# Supplementary material for: Signaling Networks Converge on TORC1-SREBP Activity to Promote Endoplasmic Reticulum Homeostasis
Source: PLoS One. 2014 Jul 9;9(7):e101164. doi: 10.1371/journal.pone.0101164 (PMC4090155; doi:10.1371/journal.pone.0101164)
Supplement: Table S1 — dsRNA libraries used for primary XBP1-EGFP screens, and amplicons used in the secondary validation screens. Z-scores from averaged normalized values, and a curated list of hits are included. (XLSX) [file pone.0101164.s006.xlsx]

## Sheet: dataset
set	Amplicon ID	Gene	xbp1EGFP Z-score-primary screen	xbp1EGFP Z-score 2ndary screen
TXN504	DRSC22996	A3-3	-0.264507
KP401	DRSC05028	14-3-3zeta	-0.300408
KP404	DRSC27525	14-3-3zeta	0.535401
TXN501	DRSC05028	14-3-3zeta	-0.634638
TXN506	DRSC27525	14-3-3zeta	-0.896318
ER/R	DRSC01864	aay	0.103129
ER/R	DRSC36744	aay	0.27199
KP401	DRSC11320	aay	1.65869
KP406	DRSC36744	aay	-0.855282
TXN505	DRSC23179	ab	2.35965
TXN507	DRSC37378	ab	1.41054
TXN501	DRSC06532	abba	1.44937
TXN504	DRSC05768	abba	1.08303
TXN506	DRSC27711	abba	0.610745
TXN504	DRSC23013	abd-A	0.69568
TXN507	DRSC29065	abd-A	-0.407351
TXN507	DRSC37379	abd-A	0.124842
TXN503	DRSC14098	Abd-B	-0.416264
TXN503	DRSC14337	Abd-B	-0.69557
TXN506	DRSC28796	Abd-B	0.461713
KP402	DRSC09661	Abl	0.0149955
KP403	DRSC23306	Abl	0.244132
KP406	DRSC36588	Abl	2.51307
KP406	DRSC36589	Abl	3.03628	2.25024
TXN502	DRSC02926	abo	1.39523
TXN507	DRSC37380	abo	1.26635
TXN505	DRSC25102	ac	0.52905
TXN502	DRSC07276	achi	3.27542
TXN505	DRSC24803	achi	-0.0749275
TXN501	DRSC07277	achi, vis	1.01956
TXN507	DRSC07277	achi, vis	0.391334
KP402	DRSC20304	acj6	0.855118
KP404	DRSC29003	acj6	1.51129
KP406	DRSC36590	acj6	3.62812
TXN502	DRSC20304	acj6	0.0908366
TXN507	DRSC29003	acj6	1.13084
KP402	DRSC08135	Ack	0.685822
KP404	DRSC28013	Ack	0.463984
KP403	DRSC14103	Acph-1	1.10328
KP406	DRSC36591	Acph-1	1.77939
TXN503	DRSC16531	Ada2b	-0.716423
TXN507	DRSC37381	Ada2b	0.376654
TXN501	DRSC04963	Adf1	0.592366
TXN504	DRSC04941	Adf1	0.833203
KP402	DRSC10248	Adk1	0.431965
KP405	DRSC29837	Adk1	0.769971
KP408	DRSC29837	Adk1	-1.71938
KP402	DRSC04043	Adk2	0.297173
KP406	DRSC36736	Adk2	-0.217457
KP402	DRSC16075	Adk3	0.641014
KP404	DRSC27968	Adk3	0.953905
KP401	DRSC05917	Ady43A	0.273232
KP404	DRSC28006	Ady43A	0.353095
TXN503	DRSC11605	Aef1	0.322711
TXN507	DRSC37382	Aef1	1.42147
ER/R	DRSC01864	Akap200	0.308044
ER/R	DRSC36791	Akap200	-0.312906
KP401	DRSC01864	Akap200	0.699915
KP406	DRSC36791	Akap200	1.03334
KP401	DRSC14108	Akt1	1.58897
KP406	DRSC36666	Akt1	0.679444
KP406	DRSC36667	Akt1	2.62352	3.21004
TXN502	DRSC00799	al	1.51544
TXN507	DRSC37383	al	0.161861
ER/R	DRSC14109	Ald	1.32135
KP401	DRSC16273	ald	-0.748373
KP407	DRSC36724	ald	0.890429
KP407	DRSC36725	ald	1.06592
TXN503	DRSC12488	Alh	-0.580671
TXN507	DRSC28926	Alh	1.20478
KP402	DRSC05918	Alk	-0.0201075
KP404	DRSC23342	Alk	0.814105
KP407	DRSC36762	Alk	3.78465	0.859736
KP407	DRSC36763	Alk	1.62828
TXN505	DRSC21784	aly	0.328759
TXN502	DRSC03484	amos	2.1143
TXN505	DRSC24784	amos	0.0641233
TXN504	DRSC23104	Antp	0.672516
TXN506	DRSC26749	Antp	0.085672
TXN504	DRSC22999	aop	2.19025
TXN505	DRSC25805	aop	-0.106028
TXN501	DRSC04917	ap	0.690919
TXN507	DRSC37384	ap	1.61838
TXN503	DRSC11601	AP-2	1.60565	0.858024
TXN507	DRSC37385	AP-2	0.104931
KP403	DRSC14116	Aph-4	0.922018
KP406	DRSC36712	Aph-4	0.37095
KP402	DRSC07639	aPKC	0.198942
KP405	DRSC29936	aPKC	1.71402
KP408	DRSC29936	aPKC	-0.0234236
TXN505	DRSC23278	apt	1.11503
TXN506	DRSC26181	apt	0.928297
TXN505	DRSC25783	ara	-0.430458
TXN503	DRSC14340	Arc42	0.231847
TXN503	DRSC15627	Arc42	-0.448057
KP401	DRSC10460	Argk	0.708282
KP402	DRSC09668	Argk	0.412575
KP403	DRSC08959	Argk	0.886854
KP403	DRSC22665	Argk	0.600549
KP404	DRSC21558	Argk	0.377177
KP405	DRSC08959	Argk	0.702234
KP408	DRSC08959	Argk	-3.51354
KP403	DRSC17136	Asator	0.231729
KP407	DRSC36753	Asator	-1.20795
KP407	DRSC36754	Asator	1.11053
ER/R	DRSC18739	ase	-0.391177
ER/R	DRSC37386	ase	1.01784
TXN504	DRSC18739	ase	0.100431
TXN507	DRSC37386	ase	1.41732
TXN501	DRSC11325	ash1	-2.13081	-2.19983
TXN507	DRSC37387	ash1	-0.430172
KP401	DRSC16903	asp	0.574068
KP406	DRSC36592	asp	5.08587	3.2223
KP406	DRSC36593	asp	3.76299
TXN505	DRSC23408	Asx	-0.213166
TXN507	DRSC37388	Asx	0.782587
TXN509	DRSC29661	ATbp	-0.730863
TXN509	DRSC37992	ATbp	-0.360182
TXN501	DRSC04130	Atf-2	-0.325653
TXN504	DRSC04413	Atf-2	0.706297
ER/R	DRSC04743	ATF6	1.69642	1.18094
ER/R	DRSC18739	ATF6	1.07195	0.970233
ER/R	DRSC28936	ATF6	-0.22291
ER/R	DRSC37386	ATF6	-0.995713
TXN502	DRSC04889	Atf6	0.656862
TXN504	DRSC04743	Atf6	1.35087
TXN507	DRSC28936	Atf6	0.973589
KP401	DRSC09809	Atg1	0.451259
KP401	DRSC09809	Atg1	0.139108
KP402	DRSC09810	Atg1	0.155247
KP402	DRSC09810	Atg1	-1.70939
ER/R	DRSC09809	ATG1	-0.0366977
ER/R	DRSC09810	ATG1	-2.32089	-1.92992
ER/R	DRSC37017	ATG1	-1.98723
ER/R	DRSC09803	ATG12	-0.28808	-1.44273
ER/R	DRSC16228	ATG13	0.355361	0.00483921
ER/R	DRSC10943	ATG18	-1.50352	-1.78994
ER/R	DRSC08273	ATG2	-0.777006	-0.358024
ER/R	DRSC00656	ATG4	0.952299
ER/R	DRSC28580	ATG4	-0.242073	0.238429
ER/R	DRSC18112	ATG5	-1.61341	-0.986327
ER/R	DRSC38116	ATG5	-0.959395
ER/R	DRSC15798	ATG6	1.01763
ER/R	DRSC24442	ATG6	-0.387505	-0.842093
ER/R	DRSC05741	ATG7	-1.0968
ER/R	DRSC06937	ATG7	-0.352523
ER/R	DRSC38117	ATG7	-1.29544	-0.370293
ER/R	DRSC18024	ATG8a	0.384461
ER/R	DRSC24298	ATG8a	-0.432849	-1.25831
ER/R	DRSC14501	ATG8b	-0.12833
ER/R	DRSC24428	ATG8b	-1.64052	-1.93792
ER/R	DRSC06848	ATG9	0.475522
ER/R	DRSC38118	ATG9	0.463243
ER/R	DRSC38119	ATG9	-1.12419	0.268421
TXN503	DRSC16904	ato	-0.494722
TXN507	DRSC37389	ato	1.20547
KP402	DRSC16905	aur	0.614894
KP404	DRSC27171	aur	1.08269
KP401	DRSC12161	auxillin	0.00248268
KP404	DRSC28178	auxillin	1.83369
KP403	DRSC16906	awd	0.488049
KP406	DRSC36594	awd	1.3313
TXN503	DRSC08140	Awh	-0.57451
TXN507	DRSC37390	Awh	0.836893
TXN501	DRSC07580	az2	0.0901553
TXN507	DRSC37391	az2	1.55207
TXN505	DRSC21922	B-H1	0.137103
TXN506	DRSC27190	B-H1	0.525712
TXN504	DRSC23012	B-H2	0.970809
TXN505	DRSC25817	B-H2	-0.784962
TXN503	DRSC08709	bab1	0.613618
TXN505	DRSC21882	bab1	-2.46881	-2.03678
TXN505	DRSC25457	bab1	-1.66236
TXN503	DRSC08150	bab2	1.51397
TXN506	DRSC26326	bab2	0.29836
KP402	DRSC07581	babo	-0.349657
KP406	DRSC36676	babo	-0.340624
KP406	DRSC36677	babo	-1.59688
KP403	DRSC14145	ball	-0.878939
KP404	DRSC26607	ball	0.303521
ER/R	DRSC14242	BAP	0.0993654
TXN504	DRSC16908	bap	0.28679
TXN506	DRSC27201	bap	-0.751348
TXN501	DRSC04964	Bap170	1.08092
TXN505	DRSC21826	Bap170	0.0567874
TXN506	DRSC27559	Bap170	0.9361
TXN502	DRSC19337	Bap60	5.1327	7.26
TXN502	DRSC20575	bbx, waw	3.3791	3.39111
TXN504	DRSC20589	bbx, waw	1.62966
TXN507	DRSC24894	bbx, waw	0.024517
TXN501	DRSC12624	bcd	0.363373
TXN505	DRSC25303	bcd	-1.23267
TXN501	DRSC05927	BEAF-32	-0.269085
TXN504	DRSC05503	BEAF-32, CG42254	0.057734
TXN509	DRSC08148	Bgb	0.218918
TXN509	DRSC25855	Bgb	-0.626958
TXN504	DRSC18742	bi	-0.15233
ER/R	DRSC10782	BI-1	1.21731
ER/R	DRSC39448	BI-1	1.21556
TXN501	DRSC07584	bic	0.0954082
TXN505	DRSC25656	bic	0.522186
TXN502	DRSC15481	bigmax	1.52132	2.18875
TXN506	DRSC27542	bigmax	0.969569
TXN503	DRSC10332	bin	-0.914513
TXN507	DRSC29845	bin	0.360988
ER/R	DRSC25105	Hsc70-3/Gp78	4.84783
ER/R	DRSC33319	Hsc70-3/Gp78	6.03474	8.35009
TXN502	DRSC17170	bip2	1.35346
TXN507	DRSC29650	bip2	-1.91232
TXN502	DRSC02757	Bka	1.29918
TXN504	DRSC22734	bl	1.50921
TXN505	DRSC24070	bl	2.2434	3.1483
TXN505	DRSC24305	Blimp-1	1.12676
TXN507	DRSC37392	Blimp-1	0.578688
TXN501	DRSC00805	bowl	-1.42094
TXN506	DRSC28379	bowl	0.302052
TXN504	DRSC17691	br	-0.357857
TXN504	DRSC17789	br	2.56708	3.01445
TXN505	DRSC25765	br	1.57016
TXN501	DRSC03497	brat	0.850717
TXN507	DRSC37393	brat	2.705	0.871554
TXN503	DRSC14166	Brf	-0.0629235
TXN503	DRSC14167	Brf	-0.60959
TXN504	DRSC23036	brk	1.39966
TXN506	DRSC27320	brk	1.3796
TXN503	DRSC11330	brm	0.940241
TXN506	DRSC26226	brm	0.17537
TXN503	DRSC08149	Bro	0.813961
TXN504	DRSC23068	bs	0.234649
TXN506	DRSC25943	bs	0.673416
TXN504	DRSC03498	bsh	0.810924
TXN505	DRSC25413	bsh	-1.63799
KP401	DRSC03499	bsk	0.560473
KP406	DRSC36595	bsk	1.76074
KP406	DRSC36596	bsk	-0.198007
KP401	DRSC17129	bt	0.835694
KP401	DRSC17171	bt	0.72465
KP403	DRSC17129	bt	0.70061
KP403	DRSC17171	bt	0.602673
KP406	DRSC36656	bt	1.13317
KP406	DRSC36657	bt	-1.27334
TXN505	DRSC25020	BtbVII	0.518745
TXN507	DRSC37394	BtbVII	1.53271
TXN504	DRSC18747	btd	1.06164
TXN507	DRSC29060	btd	1.02099
TXN504	DRSC17742	Bteb2	0.745833
TXN507	DRSC37395	Bteb2	0.645996
KP401	DRSC02666	Btk29A	0.759012
KP402	DRSC02008	Btk29A	-0.109582
KP404	DRSC22427	Btk29A	1.40857
KP407	DRSC36796	Btk29A	-1.51958
KP402	DRSC11331	btl	0.384549
KP406	DRSC36653	btl	0.0534804
KP406	DRSC36654	btl	2.57898
TXN506	DRSC26486	btn	1.10709
TXN504	DRSC13569	btn, CG31158	0.946291
KP402	DRSC04838	Bub1	0.482184
KP406	DRSC36758	Bub1	-1.4991
KP406	DRSC36759	Bub1	0.782769
TXN504	DRSC23048	Bx	1.07013
TXN506	DRSC28506	Bx	1.05524
ER/R	DRSC17743	Bx42	-1.70029	-1.45886
TXN503	DRSC11332	byn	-0.00254698
TXN507	DRSC29142	byn	0.760656
TXN509	DRSC13495	C15	1.528
TXN509	DRSC37993	C15	-0.541417
ER/R	DRSC04600	Ca-P60A	0.800024
TXN501	DRSC03501	cact	-0.643369
TXN506	DRSC28422	cact	1.45531
TXN505	DRSC23193	cad	-0.943061
TXN506	DRSC27989	cad	-0.0941346
KP403	DRSC14220	Cad96Ca	0.887516
KP403	DRSC16693	Cad96Ca	1.35992
KP406	DRSC36738	Cad96Ca	-0.660495
KP406	DRSC36739	Cad96Ca	1.11355
ER/R	DRSC16596	Caf1	-1.0199	-2.50876
TXN501	DRSC16596	Caf1	-2.28434	-3.56083
TXN507	DRSC37396	Caf1	-1.90789
KP403	DRSC14588	Caki	3.4812
KP403	DRSC16597	Caki	0.217091
KP403	DRSC16598	Caki	0.476839
KP404	DRSC21917	Caki	0.570915
KP405	DRSC14588	Caki	3.08847	3.28892
KP405	DRSC29057	Caki	3.7094
KP408	DRSC14588	Caki	0.719864
KP408	DRSC29057	Caki	2.14448
KP401	DRSC17162	CaMKI	0.794599	0.0349565
KP403	DRSC17162	CaMKI	0.363114
KP406	DRSC36713	CaMKI	-0.536731
KP406	DRSC36714	CaMKI	0.875679
KP401	DRSC17214	CaMKII	0.513344
KP403	DRSC17214	CaMKII	0.479039
KP406	DRSC36643	CaMKII	0.552356
KP406	DRSC36644	CaMKII	2.36844	0.0844825
TXN501	DRSC07272	Camta	-0.548002
TXN507	DRSC37397	Camta	0.61401
TXN504	DRSC10664	can	0.424128
TXN507	DRSC37398	can	2.5397	0.650032
KP403	DRSC23296	CanA-14F	0.722528
KP407	DRSC36612	CanA-14F, Pp2B-14D	2.85056	2.1201
KP403	DRSC16600	CanA1	0.812957
KP404	DRSC25868	CanA1	1.05281
KP403	DRSC18449	CanB	1.03638
KP405	DRSC29220	CanB	-1.63412	0.00329046
KP408	DRSC29220	CanB	0.0865743
KP403	DRSC07355	CanB2	0.816865
KP404	DRSC27440	CanB2	0.26481
TXN503	DRSC12373	cas	-2.21289	-0.923002
TXN505	DRSC24858	cas	-0.344396
TXN502	DRSC07589	cato	0.743246
TXN505	DRSC23280	caz	-0.0907839
TXN507	DRSC29957	caz	0.116674
TXN501	DRSC00655	cbt	-0.575658
TXN506	DRSC26117	cbt	0.277522
KP401	DRSC03504	cdc2	-0.0790964
KP401	DRSC16921	cdc2c	0.50565
KP406	DRSC36625	cdc2c	-0.749969
KP402	DRSC07590	cdc2rk	-0.0925248
KP405	DRSC29758	cdc2rk	1.87956
KP408	DRSC29758	cdc2rk	-0.249544
KP402	DRSC08648	Cdc37	0.0233368
KP404	DRSC27723	Cdc37	0.592918
GEFGAP	DRSC20228	Cdc42	0.616631
GEFGAP	DRSC12028	Cdep	0.38676
GEFGAP	DRSC03289	CdGAPr	1.0669
KP401	DRSC16922	cdi	0.699104
KP404	DRSC28376	cdi	1.83439
KP406	DRSC36651	cdi	3.2466
KP406	DRSC36652	cdi	0.762912
KP401	DRSC07358	Cdk4	1.70139
KP404	DRSC27263	Cdk4	2.67321	3.50378
KP401	DRSC07359	Cdk5	0.157015
KP406	DRSC36682	Cdk5	1.65541	2.00479
KP402	DRSC03290	Cdk5alpha	1.03328
KP403	DRSC23301	Cdk5alpha	2.1231	1.37039
KP403	DRSC18451	Cdk7	0.120929
KP404	DRSC23327	Cdk7	1.14545
TXN504	DRSC18451	Cdk7	-0.318347
TXN505	DRSC23327	Cdk7	-0.966426
KP401	DRSC11113	Cdk8	0.916833
KP404	DRSC28684	Cdk8	0.444901
TXN501	DRSC11113	Cdk8	-0.251307
TXN506	DRSC28684	Cdk8	0.106758
KP402	DRSC04601	Cdk9	-1.21451
TXN502	DRSC04601	Cdk9	-1.75156	-2.7469
TXN509	DRSC14371	Cenp-C	1.17308
TXN509	DRSC29707	Cenp-C	2.60484	3.20912
TXN506	DRSC28177	Cf2	2.1247
TXN505	DRSC23142	cg	-0.546575
TXN506	DRSC28656	cg	1.32112
KP402	DRSC09695	CG10089	0.712461
KP404	DRSC25988	CG10089	0.407061
TXN503	DRSC09706	CG10147	0.355958
TXN507	DRSC29564	CG10147	-0.534392
KP402	DRSC14194	CG10148	0.0528684
KP407	DRSC36714	CG10148	-2.20218
KP403	DRSC14201	CG10177	0.991293
KP404	DRSC27888	CG10177	2.11365
GEFGAP	DRSC02023	CG10188	-0.0795434
TXN501	DRSC05980	CG10209	-0.568385
TXN507	DRSC37399	CG10209	1.32542
TXN503	DRSC14218	CG10232	-0.166409
TXN503	DRSC12496	CG1024	-1.08058
TXN507	DRSC37400	CG1024	3.12357	4.67771
KP403	DRSC18655	CG10260	2.02193
KP407	DRSC36759	CG10260	2.0464	3.11109
KP407	DRSC36760	CG10260	-0.595766
TXN501	DRSC12514	CG10267	1.20657
TXN507	DRSC37401	CG10267	0.132137
KP402	DRSC02032	CG10268	0.695375
KP407	DRSC36641	CG10268	1.59003
TXN501	DRSC09716	CG10274	1.87413
TXN505	DRSC24792	CG10274	-0.323626
TXN504	DRSC04061	CG10321	0.887092
TXN506	DRSC28284	CG10321	-0.80534
TXN505	DRSC23233	CG10348	0.393433
TXN507	DRSC30046	CG10348	0.141964
TXN501	DRSC02046	CG10366	-0.68487
TXN506	DRSC26463	CG10366	-0.0616685
KP401	DRSC02049	CG10376	0.0331606
KP404	DRSC26744	CG10376	0.267992
KP407	DRSC36636	CG10376	-2.80134
KP401	DRSC04846	CG10417	0.298532
KP404	DRSC27173	CG10417	1.32001
KP407	DRSC36647	CG10417	1.11218
KP402	DRSC09723	CG10426	0.0988858
KP407	DRSC36689	CG10426	0.865464
KP407	DRSC36690	CG10426	0.0754836
TXN502	DRSC02055	CG10431	4.71333	2.53421
TXN507	DRSC37402	CG10431	1.36461
TXN502	DRSC02057	CG10447	0.555582
KP402	DRSC05991	CG10459	0.394012
KP404	DRSC22092	CG10459	1.24152
TXN501	DRSC02058	CG10462	0.441816
TXN507	DRSC37403	CG10462	1.60133
KP402	DRSC02065	CG10493	0.78707
KP403	DRSC22808	CG10493	0.509572
KP407	DRSC36637	CG10493	3.32377
TXN504	DRSC23102	CG10543	-0.351324
TXN507	DRSC37404	CG10543	0.72576
TXN501	DRSC09745	CG10576	-0.0770759
TXN507	DRSC37406	CG10576	0.164135
TXN501	DRSC02081	CG10631	0.0129161
TXN507	DRSC37407	CG10631	0.798555
TXN503	DRSC09767	CG10654	0.143964
TXN507	DRSC37408	CG10654	0.255631
TXN503	DRSC14261	CG10669	-0.431628
TXN507	DRSC37409	CG10669	1.21219
KP402	DRSC09774	CG10673	0.0246717
KP401	DRSC02097	CG10702	-0.00498768
KP407	DRSC36638	CG10702	-1.98006	NA
KP407	DRSC36639	CG10702	0.665484
KP402	DRSC09795	CG10743	0.63131
KP404	DRSC23339	CG10743	0.401047
KP404	DRSC28695	CG10743	0.72052
ER/R	DRSC09801	CG10754	1.33278
KP401	DRSC14269	CG10827	0.657522
KP405	DRSC29539	CG10827	0.372
KP408	DRSC29539	CG10827	0.279834
ER/R	DRSC14275	CG10881	-1.37218
KP402	DRSC06016	CG10933	1.05373
KP407	DRSC36658	CG10933	-1.64182
TXN507	DRSC02112	CG10949	0.938674
TXN509	DRSC27310	CG10949	-0.9505
TXN502	DRSC17769	CG10959	1.12122
TXN507	DRSC29120	CG10959	0.583637
TXN503	DRSC12153	CG10979	0.995713
TXN507	DRSC37410	CG10979	1.75515
KP401	DRSC12157	CG10999	0.134573
KP404	DRSC26577	CG10999	0.772588
TXN502	DRSC19367	CG11063	1.36854
TXN506	DRSC26225	CG11063	0.821821
TXN504	DRSC19370	CG11071	-0.188592
TXN507	DRSC29723	CG11071	-0.252665
TXN505	DRSC25203	CG11085	0.801338
TXN506	DRSC26567	CG11152	0.504818
KP402	DRSC02134	CG11221	-0.100623
KP404	DRSC28743	CG11221	0.765891
TXN505	DRSC21901	CG11247	-0.259385
TXN506	DRSC26558	CG11247	-0.115191
TXN507	DRSC11643	CG11247	2.33553
KP401	DRSC09827	CG11255	-0.291233
KP407	DRSC36691	CG11255	-0.620193
TXN505	DRSC25060	CG11294	0.280815
TXN504	DRSC18625	CG11398	1.09553
TXN507	DRSC37411	CG11398	0.659579
TXN501	DRSC04110	CG11414	-1.11638
TXN507	DRSC37412	CG11414	1.8162
KP402	DRSC11657	CG11425	1.56326
KP404	DRSC28400	CG11425	2.25765	1.82045
KP402	DRSC11658	CG11426	2.02864	1.7201
KP404	DRSC27815	CG11426	1.79035
KP402	DRSC11659	CG11437	0.511191
KP402	DRSC11660	CG11438	-0.0420499
KP407	DRSC36699	CG11438	1.18193
KP401	DRSC11661	CG11440	0.0475079
KP404	DRSC23330	CG11440	-1.95431
KP405	DRSC29129	CG11440	-2.36958	-2.10098
KP408	DRSC29129	CG11440	-1.50264
TXN501	DRSC11665	CG11456	-0.650492
TXN507	DRSC37413	CG11456	1.38272
KP401	DRSC11668	CG11489	0.0310507
KP402	DRSC11856	CG11489	0.453125
KP405	DRSC29962	CG11489	-1.46114
KP406	DRSC36763	CG11489	-1.26972
KP408	DRSC29962	CG11489	-2.00526	-2.72009
TXN509	DRSC14318	CG11504	-0.98555
TXN509	DRSC09843	CG11560	0.0975565
TXN509	DRSC27017	CG11560	0.159024
KP401	DRSC09847	CG11597	0.585184
KP407	DRSC36688	CG11597, CG5946	0.0177208
TXN505	DRSC21786	CG11617	1.44642
TXN506	DRSC28154	CG11617	1.7834	1.25083
KP401	DRSC09853	CG11660	0.247653
KP407	DRSC36686	CG11660	1.82966
KP407	DRSC36687	CG11660	0.382947
TXN504	DRSC19416	CG11695	-0.0513731
TXN507	DRSC29760	CG11695	0.506879
TXN502	DRSC19417	CG11696	3.07976
TXN507	DRSC37414	CG11696	0.017914
TXN501	DRSC00324	CG11723	0.720149
TXN505	DRSC24890	CG11723	0.460202
TXN503	DRSC14376	CG11762	-2.11312
TXN507	DRSC37415	CG11762	0.375432
KP402	DRSC09862	CG11811	-0.636284
KP407	DRSC36683	CG11811	0.888374
TXN502	DRSC00326	CG11835	1.86743
TXN507	DRSC37416	CG11835	0.296356
KP403	DRSC14413	CG11859	0.563615
KP407	DRSC36745	CG11859	-4.08271
KP407	DRSC36746	CG11859	1.11683
KP401	DRSC14415	CG11870	0.784273
KP402	DRSC14414	CG11870	0.190538
KP407	DRSC36710	CG11870	-2.1726
TXN502	DRSC14420	CG11876	3.25348
TXN507	DRSC28805	CG11902	0.265301
TXN503	DRSC06096	CG11906	0.281077
TXN507	DRSC37417	CG11906	0.516878
TXN503	DRSC14448	CG11966	0.859747
TXN507	DRSC29647	CG11966	0.0349027
TXN503	DRSC08233	CG12029	0.983354
TXN505	DRSC23137	CG12054	1.2119
TXN507	DRSC37418	CG12054	1.37284
KP403	DRSC14470	CG12069	0.80518
KP404	DRSC26204	CG12069	1.0764
TXN504	DRSC22972	CG12071	1.01559
KP402	DRSC12192	CG12147	-0.876571
KP405	DRSC30029	CG12147	0.867267
KP408	DRSC30029	CG12147	0.767157
KP401	DRSC17825	CG12151	0.686432
KP403	DRSC17825	CG12151	0.545006
KP404	DRSC26725	CG12151	0.162299
TXN509	DRSC23294	CG12155	-0.560667
KP402	DRSC08260	CG12169	0.375455
KP404	DRSC27792	CG12169	1.19299
TXN506	DRSC24690	CG12219	1.09423
TXN507	DRSC37419	CG12219	0.600176
TXN504	DRSC17831	CG12236	-0.282075
TXN505	DRSC25773	CG12236	0.245433
KP401	DRSC04121	CG12252	0.330401
KP404	DRSC26715	CG12252	-0.42777
KP407	DRSC36671	CG12252	1.22813
KP401	DRSC12534	CG1227	0.645352
KP404	DRSC25952	CG1227	1.55725
TXN506	DRSC23611	CG12299	2.07882
TXN507	DRSC37421	CG12299	-0.510729
TXN501	DRSC08269	CG1233	0.274613
TXN506	DRSC26110	CG1233	0.0429963
TXN501	DRSC06147	CG12391	0.922459
TXN507	DRSC37422	CG12391	0.463559
TXN503	DRSC08286	CG12605	-0.794591
TXN509	DRSC27326	CG12659	-0.695379
TXN509	DRSC37995	CG12659	-0.929838
KP401	DRSC08290	CG1271	0.842747
KP407	DRSC36678	CG1271	0.68046
KP407	DRSC36679	CG1271	0.738288
TXN501	DRSC06164	CG12744	-0.164596
TXN507	DRSC37423	CG12744	-0.055695
KP401	DRSC12218	CG12746	-1.62722
KP407	DRSC36705	CG12746	-2.63413	-3.40029
TXN509	DRSC23215	CG12768	0.348346
TXN509	DRSC28549	CG12768	0.301286
TXN506	DRSC25056	CG12769	1.09774
TXN507	DRSC37424	CG12769	-1.44285
TXN506	DRSC23818	CG12856, kn	1.75106
TXN501	DRSC06253	CG12942	-1.6894
TXN506	DRSC25987	CG12942	0.947384
TXN502	DRSC02219	CG13123	0.186656
TXN507	DRSC37425	CG13123	-0.391694
KP402	DRSC02221	CG13125	-0.0947461
KP407	DRSC36632	CG13125	-0.155423
TXN501	DRSC06310	CG13185	-2.11292
TXN507	DRSC37427	CG13185	1.77575
TXN502	DRSC06328	CG13204	1.99491
TXN506	DRSC27988	CG13204	0.721211
TXN504	DRSC09961	CG13287	-0.397216
TXN506	DRSC26934	CG13287	1.76355
TXN503	DRSC09970	CG13296	0.431058
TXN507	DRSC37428	CG13296	0.802242
TXN503	DRSC06387	CG13424	-0.628378
TXN506	DRSC27541	CG13424	1.64624
KP401	DRSC04837	CG1344	0.38296
KP406	DRSC36787	CG1344	-1.03271
KP406	DRSC36788	CG1344	0.48629
TXN503	DRSC14620	CG13617	1.03552
TXN507	DRSC37429	CG13617	1.11489
TXN509	DRSC14626	CG13624	-1.13744
TXN509	DRSC24359	CG13624	-0.416217
TXN501	DRSC02278	CG13773	2.95742
TXN506	DRSC28047	CG13773	0.0995209
TXN502	DRSC02279	CG13775	1.45297
TXN507	DRSC29121	CG13775	0.848112
TXN506	DRSC24686	CG13796	0.764224
TXN509	DRSC29274	CG13894	-0.654382
TXN503	DRSC08367	CG13897	-1.43486
TXN507	DRSC29262	CG13897	1.37616
KP403	DRSC23158	CG14030	1.09776
KP404	DRSC27436	CG14030	0.610494
KP407	DRSC36628	CG14030	0.97094
KP407	DRSC36629	CG14030	0.997893
TXN509	DRSC18594	CG14050	0.325424
KP402	DRSC10164	CG14163	-0.253783
KP404	DRSC28408	CG14163	0.607503
KP402	DRSC19567	CG14211	0.955567
KP404	DRSC27673	CG14211	1.62186
KP407	DRSC36617	CG14211	1.80019	2.0019
TXN504	DRSC19572	CG14216	1.40156
TXN506	DRSC27868	CG14216	1.58986	0.809918
KP403	DRSC14776	CG14297	0.187481
KP407	DRSC36729	CG14297	0.0222638
KP403	DRSC14784	CG14305	1.65166
KP404	DRSC26679	CG14305	0.184123
TXN504	DRSC20984	CG14578, bcd	1.4094
TXN504	DRSC12241	CG14655	0.549925
TXN507	DRSC29900	CG14655	1.0861
TXN503	DRSC12253	CG14667	1.77067
TXN506	DRSC28216	CG14667	0.992097
TXN501	DRSC14933	CG14710	-0.297412
TXN508	DRSC37431	CG14710	0.343878
KP402	DRSC14937	CG14714	0.48246
KP404	DRSC23337	CG14714	0.790778
KP404	DRSC28248	CG14714	1.0368
TXN509	DRSC08421	CG14962	0.0401454
TXN509	DRSC37996	CG14962	1.08582
TXN501	DRSC08464	CG15011	0.618178
TXN508	DRSC37432	CG15011	0.0253107
KP402	DRSC06505	CG15072	0.407133
KP405	DRSC29149	CG15072	1.65207
KP408	DRSC29149	CG15072	-0.496879
TXN503	DRSC06506	CG15073	-1.17988
TXN506	DRSC27105	CG15073	0.143796
TXN506	DRSC24737	CG15269	-0.757289
TXN508	DRSC37433	CG15269	-0.271776
TXN504	DRSC20515	CG1529	0.527098
TXN506	DRSC24433	CG1529	0.194824
TXN507	DRSC20515	CG1529	0.259277
TXN504	DRSC18019	CG15336	-0.160079
TXN506	DRSC28008	CG15336	0.646493
TXN501	DRSC00451	CG15436	-1.0669
TXN507	DRSC29550	CG15436	-0.0035937
TXN502	DRSC15053	CG15514	1.64128
TXN507	DRSC29785	CG15514	0.918192
KP403	DRSC15065	CG15528	0.755167
GEFGAP	DRSC06563	CG15611	0.0324664
TXN503	DRSC15118	CG15696	-1.31644
TXN506	DRSC25170	CG15696	0.644991
TXN502	DRSC06581	CG15710	1.15839
TXN502	DRSC06601	CG1602	3.02408
TXN508	DRSC37434	CG1602	-0.122225
TXN501	DRSC06602	CG1603	-1.10729
TXN506	DRSC27982	CG1603	-0.725403
TXN507	DRSC06604	CG1621	0.491409
TXN509	DRSC25252	CG1621	0.593608
KP401	DRSC19748	CG1637	1.17666
KP403	DRSC18865	CG1637	0.185422
KP403	DRSC19749	CG1637	1.18689
KP405	DRSC29080	CG1637	2.28387
KP408	DRSC29080	CG1637	-0.480635
TXN502	DRSC15134	CG1647	1.1655
TXN508	DRSC37435	CG1647	-0.095177
TXN502	DRSC06613	CG1663	-0.273738
TXN506	DRSC28315	CG1663	0.362475
ER/R	DRSC12285	CG16708	-0.130358
ER/R	DRSC36910	CG16708	-0.823725
KP401	DRSC12285	CG16708	-0.274644
KP407	DRSC36700	CG16708	0.997661
KP407	DRSC36701	CG16708	-0.252942
KP402	DRSC02515	CG16771	0.0820784
KP407	DRSC36640	CG16771	4.16021
TXN502	DRSC04279	CG16778	2.47212	2.54083
TXN506	DRSC27208	CG16778	1.86528
TXN503	DRSC15153	CG16779	-0.765822
TXN508	DRSC37436	CG16779	-1.1865
TXN503	DRSC15159	CG16899	-0.180651
TXN507	DRSC29407	CG16899	1.1134
KP403	DRSC18561	CG16903	1.33972
KP407	DRSC36761	CG16903	0.191072
TXN504	DRSC18561	CG16903	0.960189
ER/R	DRSC15166	CG16941	0.278323
TXN508	DRSC37437	CG17068	0.229007
KP403	DRSC23155	CG17090	-1.56737
KP407	DRSC36675	CG17090	-1.75155	-1.63118
KP407	DRSC36676	CG17090	-1.49845
TXN502	DRSC02579	CG17118	1.0776
KP402	DRSC02580	CG17124	0.906369
KP405	DRSC29139	CG17124	2.81801	-0.998834
KP408	DRSC29139	CG17124	-1.0364
TXN509	DRSC10252	CG17153	0.0717217
TXN503	DRSC08515	CG17181	-0.300781
TXN504	DRSC07887	CG17181	4.57529
TXN507	DRSC25608	CG17181	0.820918
TXN509	DRSC15180	CG17186	-0.896166
TXN509	DRSC27612	CG17186	0.521675
TXN507	DRSC00494	CG17257	0.694076
TXN509	DRSC27495	CG17257	-0.90753
TXN505	DRSC22448	CG17328	0.524268
TXN507	DRSC01927	CG17328	0.850199
TXN507	DRSC25397	CG17328	0.853289
TXN503	DRSC10265	CG17359	-0.38752
TXN507	DRSC24439	CG17359	-0.210826
TXN507	DRSC23446	CG17361	-0.206619
TXN502	DRSC06664	CG17385	2.0732
TXN506	DRSC26999	CG17385	1.00835
KP402	DRSC07761	CG17528	-0.207825
KP407	DRSC36645	CG17528	2.37626
KP407	DRSC36646	CG17528	-3.26705
TXN507	DRSC02628	CG17568	1.04176
TXN508	DRSC37442	CG17568	-0.15686
KP402	DRSC20636	CG17598	0.573292
KP407	DRSC36618	CG17598	0.632463
KP407	DRSC36619	CG17598	0.327464
TXN501	DRSC00505	CG17612	-0.214492
TXN506	DRSC28366	CG17612	0.822672
KP402	DRSC11907	CG17698	0.497814
KP407	DRSC36755	CG17698	0.585631
TXN501	DRSC06687	CG17724	2.83052
TXN506	DRSC27618	CG17724	0.125081
KP401	DRSC08521	CG17746	0.0906561
KP404	DRSC23333	CG17746	-0.0721892
TXN503	DRSC15273	CG17801	0.150984
TXN508	DRSC37443	CG17801	0.772364
TXN503	DRSC15274	CG17802	-0.739813
TXN507	DRSC24564	CG17802	0.246184
TXN504	DRSC22811	CG17803	-1.37394
TXN502	DRSC15276	CG17806	2.00517	2.19187
TXN508	DRSC37444	CG17806	1.0792
TXN504	DRSC18484	CG17829	1.12186
TXN507	DRSC24069	CG17829	-0.90779
TXN509	DRSC15283	CG17836	1.2835
TXN509	DRSC28718	CG17836	0.96268
ER/R	DRSC15286	CG17838	-1.21776
TXN507	DRSC02642	CG17912	3.17667
TXN509	DRSC25285	CG17912	-0.122735
TXN504	DRSC15290	CG1792	0.643955
TXN506	DRSC28745	CG1792	1.08129
TXN501	DRSC06697	CG18011	0.639105
TXN502	DRSC06706	CG18011	2.68614
KP401	DRSC06710	CG1809	0.473553
KP407	DRSC36648	CG1809	0.384673
TXN504	DRSC18149	CG18262	1.6485
TXN507	DRSC24242	CG18262	0.0417055
TXN503	DRSC10310	CG18265	1.44426
TXN508	DRSC37445	CG18265	-0.201042
TXN505	DRSC21682	CG1832	-0.506661
TXN507	DRSC29935	CG1832	-1.84618
TXN502	DRSC06752	CG18446	3.39763	0.90334
TXN508	DRSC37446	CG18446	-0.494102
TXN501	DRSC06755	CG1845	-0.958311
TXN508	DRSC37447	CG1845	-0.124242
TXN501	DRSC15281	CG18476	0.252945
TXN508	DRSC37448	CG18476	0.0769924
TXN504	DRSC23121	CG18599	0.369547
TXN505	DRSC25823	CG18599	-0.302375
TXN501	DRSC14129	CG18616, Lim1	0.73795
TXN502	DRSC02683	CG18619	3.07271
TXN503	DRSC15391	CG18764	-0.105932
TXN508	DRSC37449	CG18764	0.190435
KP402	DRSC02702	CG18854	-0.34745
KP405	DRSC29809	CG18854	1.79078	2.00199
KP408	DRSC29809	CG18854	1.64549
KP401	DRSC02218	CG18854, IP3K1	0.961576
KP401	DRSC02218	CG18854, IP3K1	0.653125
KP404	DRSC23313	CG18854, IP3K1	1.94328	1.4904
KP404	DRSC23313	CG18854, IP3K1	0.847988
TXN504	DRSC15396	CG1894	-0.74606
TXN508	DRSC37451	CG1894	-0.217689
KP401	DRSC15398	CG1906	0.419657
KP404	DRSC28570	CG1906	1.69451
KP401	DRSC15403	CG1951	0.732375
KP407	DRSC36747	CG1951	-0.334275
KP407	DRSC36748	CG1951	1.92629
TXN505	DRSC21828	CG1965	0.0445646
KP403	DRSC15408	CG1973	1.13796
KP407	DRSC36750	CG1973	2.50221
KP407	DRSC36751	CG1973	-0.966848
TXN503	DRSC12298	CG2051	0.109562
TXN507	DRSC29235	CG2051	1.00736
TXN502	DRSC17128	CG2052	1.24336
TXN504	DRSC17153	CG2052	1.0446
TXN507	DRSC25407	CG2052	1.24916
KP402	DRSC12304	CG2104	0.491089
KP407	DRSC36706	CG2104	0.00382917
TXN502	DRSC18206	CG2116	2.39993	3.12088
TXN507	DRSC24617	CG2116	1.78852
TXN504	DRSC18207	CG2120	0.0860229
TXN506	DRSC26944	CG2120	1.6371	1.35081
TXN502	DRSC18209	CG2129	2.06565	1.62038
TXN507	DRSC24934	CG2129	1.59297
TXN501	DRSC08558	CG2199	-1.23789
TXN506	DRSC26845	CG2199	1.21084
KP401	DRSC03721	CG2201	0.308253
KP407	DRSC36644	CG2201	0.00834268
TXN507	DRSC23452	CG2202	0.971926
TXN508	DRSC37452	CG2202	0.422291
KP403	DRSC19863	CG2577	0.568366
KP403	DRSC23309	CG2577	0.464412
KP404	DRSC26322	CG2577	1.08561
TXN504	DRSC22871	CG2678	0.263548
TXN507	DRSC15446	CG2678	0.247046
TXN507	DRSC29690	CG2678	1.45715
TXN502	DRSC18589	CG2712	3.33894	4.01991
TXN508	DRSC37453	CG2712	1.98155
ER/R	DRSC00535	CG2807	-1.39827
TXN509	DRSC18231	CG2875	1.62084
TXN509	DRSC37997	CG2875	-0.31639
TXN504	DRSC18236	CG2889	0.168833
TXN508	DRSC37455	CG2889	-0.734293
KP402	DRSC00554	CG2964	0.18863
KP404	DRSC27524	CG2964	0.579819
TXN502	DRSC06730	CG30020	3.66857	2.09188
TXN504	DRSC06252	CG30020	1.55861
TXN502	DRSC05970	CG30077	1.95693	0.933029
KP402	DRSC00560	CG3008	0.692167
KP407	DRSC36626	CG3008	-4.36768	1.63925
KP407	DRSC36627	CG3008	1.11292
TXN504	DRSC05571	CG30080	1.93898
TXN508	DRSC37456	CG30080	0.404377
GEFGAP	DRSC06748	CG30115	0.342735
TXN504	DRSC18266	CG3032	-0.429507
TXN507	DRSC24426	CG3032	1.68428
TXN502	DRSC04904	CG30431	1.58676
GEFGAP	DRSC04775	CG30440	-0.234612
GEFGAP	DRSC06565	CG30456	0.200367
TXN507	DRSC24998	CG3065	1.5764
TXN504	DRSC23106	CG3075	1.37237
KP401	DRSC04337	CG3105	0.659254
KP404	DRSC28829	CG3105	1.07117
KP407	DRSC36668	CG3105	5.46613	3.92872
KP407	DRSC36669	CG3105	4.10313
TXN503	DRSC14623	CG31126	0.648147
KP401	DRSC14603	CG31140	1.16535
KP403	DRSC15904	CG31140	1.05816
TXN503	DRSC15325	CG31169	0.199807
TXN504	DRSC13561	CG31169	1.31193
KP402	DRSC15444	CG31187	0.921418
KP402	DRSC16575	CG31187	0.515836
TXN502	DRSC16290	CG31224	1.49784
TXN504	DRSC15272	CG31224	0.996886
TXN503	DRSC16058	CG31272	-0.63951
TXN508	DRSC37457	CG31272	0.987902
TXN505	DRSC22164	CG31301	-0.0895953
TXN508	DRSC37458	CG31301	1.70534
TXN502	DRSC15610	CG31365	3.01939
TXN508	DRSC37459	CG31365	-0.247441
TXN505	DRSC22275	CG31367	-0.542617
TXN507	DRSC30081	CG31367	-0.756642
TXN501	DRSC15254	CG31388	0.865489
TXN508	DRSC37460	CG31388	-0.4671
TXN509	DRSC14370	CG31460	-1.29984
KP402	DRSC16510	CG31469	-0.382709
KP407	DRSC36771	CG31469	-0.382801
TXN502	DRSC03698	CG31612	0.869575
KP402	DRSC02318	CG31640	1.43188
KP402	DRSC02319	CG31640	0.688902
KP402	DRSC02504	CG31640	0.468006
KP403	DRSC22866	CG31640	0.823278
KP404	DRSC26352	CG31640	0.578477
KP405	DRSC02318	CG31640	1.05882
KP408	DRSC02318	CG31640	0.86001
TXN501	DRSC00700	CG31670	1.29748
TXN508	DRSC37462	CG31670	0.186868
KP402	DRSC02760	CG31711	0.564879
KP403	DRSC23297	CG31711	-0.143877
KP407	DRSC36772	CG31711	3.99316
KP407	DRSC36773	CG31711	1.31397
KP401	DRSC02228	CG31714	1.19279
KP402	DRSC02229	CG31714	0.580939
KP402	DRSC02902	CG31714	-0.27229
KP402	DRSC02903	CG31714	0.249753
TXN502	DRSC02830	CG31716	4.71337
TXN502	DRSC02831	CG31716	5.75826	6.14357
TXN504	DRSC01230	CG31759	-0.759748
TXN508	DRSC37463	CG31759	0.743727
TXN504	DRSC01554	CG31782	-0.564208
TXN504	DRSC01556	CG31782	0.729553
TXN505	DRSC22161	CG31904, CG13796	1.18795
TXN509	DRSC00285	CG31955	-1.1802
TXN505	DRSC21768	CG32006	-0.467359
TXN506	DRSC28120	CG32006	-0.445148
TXN503	DRSC09726	CG32105	0.174991
TXN506	DRSC26224	CG32105	1.48022
TXN504	DRSC09265	CG32121	-0.219955
TXN508	DRSC37464	CG32121	0.130738
TXN503	DRSC10660	CG32133	-0.168913
TXN508	DRSC37465	CG32133	-1.05704
TXN509	DRSC08169	CG32264	-1.19994
TXN509	DRSC08285	CG32264	0.0833011
TXN509	DRSC25774	CG32264	-0.435517
KP403	DRSC08895	CG32373	0.174674
KP407	DRSC36774	CG32373	-2.544	-1.11763
KP407	DRSC36775	CG32373	-1.12429
TXN504	DRSC19556	CG32532	1.47833
TXN504	DRSC19557	CG32532	0.854954
TXN504	DRSC21370	CG32532	0.909097
KP403	DRSC19913	CG32568	0.304845
KP407	DRSC36778	CG32568	0.228248
TXN504	DRSC20183	CG32601	-0.0417755
TXN506	DRSC27147	CG32601, CG32598	0.70037
KP403	DRSC19900	CG32649	0.354711
KP407	DRSC36779	CG32649	-2.11441
KP403	DRSC19778	CG32666	-0.215708
KP403	DRSC23298	CG32666	0.596882
KP404	DRSC28871	CG32666	1.77757
KP407	DRSC36780	CG32666	1.22778
KP403	DRSC18210	CG32687	-0.293392
KP403	DRSC18237	CG32687	1.25591
KP403	DRSC18127	CG32703	0.423694
KP403	DRSC18227	CG32703	-0.486958
KP404	DRSC21895	CG32703	0.969858
TXN507	DRSC23721	CG32767	1.74381
KP402	DRSC00588	CG3277	1.15996
KP407	DRSC36622	CG3277	0.88842
KP407	DRSC36623	CG3277	-2.66177
TXN502	DRSC18406	CG32772	2.3427
TXN505	DRSC22349	CG32772	-0.508753
TXN504	DRSC23070	CG32778	1.5958
TXN506	DRSC26563	CG32778	0.691288
TXN501	DRSC15470	CG3281	-1.08447
TXN506	DRSC28414	CG3281	1.99448
KP403	DRSC18478	CG32812	0.599159
TXN505	DRSC23151	CG32830	-0.830893
TXN504	DRSC22901	CG32847	1.17447
KP402	DRSC04354	CG3290	-0.186777
KP404	DRSC26474	CG3290	0.537211
KP402	DRSC12138	CG32944	0.358094
KP402	DRSC12341	CG32944	-0.0445494
TXN509	DRSC06573	CG33017	-0.250814
TXN509	DRSC06574	CG33017	0.796149
TXN501	DRSC12567	CG33097	0.0564977
TXN507	DRSC25154	CG33097	0.973449
TXN509	DRSC14487	CG33213	0.1387
TXN503	DRSC10014	CG33260, Trl	0.49005
GEFGAP	DRSC08891	CG33275	-0.00999223
TXN508	DRSC37466	CG33557	-0.152711
KP401	DRSC06628	CG33671, CG33672, spt4	1.56824
KP403	DRSC05356	CG33671, CG33672, spt4	1.03374
TXN501	DRSC06628	CG33671, CG33672, spt4	0.354593
TXN501	DRSC06628	CG33671, CG33672, spt4	0.109308
TXN504	DRSC05356	CG33671, CG33672, spt4	0.909514
TXN503	DRSC05988	CG33786, CG33785	-0.149299
TXN506	DRSC26790	CG33786, CG33785	1.3853
TXN503	DRSC15147	CG33936	1.22947
TXN503	DRSC15148	CG33937	0.539219
TXN501	DRSC00603	CG3407	-0.727762
TXN508	DRSC37467	CG3407	-0.422324
TXN502	DRSC00537	CG34340	0.927739
TXN502	DRSC02850	CG34367	2.68905
TXN506	DRSC28054	CG34367	1.02566
TXN503	DRSC14701	CG34376	-0.0923938
TXN507	DRSC25207	CG34376	-0.285405
TXN509	DRSC24983	CG34376	0.932616
TXN501	DRSC00523	CG34406	-0.887536
TXN502	DRSC00606	CG34406	2.30011
TXN505	DRSC25843	CG34406	-0.411184
TXN504	DRSC20029	CG34422	3.39847
TXN508	DRSC37496	CG34422	0.0999884
KP402	DRSC04375	CG3494	0.143847
KP407	DRSC36670	CG3494	-0.234317
KP402	DRSC04046	CG3530	0.647211
KP404	DRSC26569	CG3530	1.63915
KP406	DRSC36793	CG3530	0.026349
KP406	DRSC36794	CG3530	-1.77427
ER/R	DRSC00612	CG3542	0.74654
KP401	DRSC18576	CG3573	0.90208
KP406	DRSC36745	CG3573	-0.30355
KP406	DRSC36746	CG3573	0.467614
ER/R	DRSC00619	CG3605	1.1129
KP401	DRSC04394	CG3608	0.215044
KP407	DRSC36672	CG3608	1.02254
KP402	DRSC19871	CG3632	0.981032
KP407	DRSC36610	CG3632	-5.72656	0.00074383
KP407	DRSC36611	CG3632	0.897892
TXN501	DRSC10372	CG3654	0.809545
TXN508	DRSC37468	CG3654	1.13569
TXN504	DRSC18176	CG3711	1.91813
TXN504	DRSC18647	CG3711	0.0584292
TXN506	DRSC26706	CG3711	0.297924
TXN505	DRSC23143	CG3726	0.580336
TXN506	DRSC27453	CG3726	0.87805
TXN507	DRSC25057	CG3732	0.921714
KP402	DRSC15514	CG3809	1.27089
KP403	DRSC15514	CG3809	0.2778
KP407	DRSC36713	CG3809	0.451513
KP401	DRSC15517	CG3837	0.950829
KP407	DRSC36719	CG3837	0.025823
KP407	DRSC36720	CG3837	0.776544
TXN507	DRSC24965	CG3838	0.46375
TXN508	DRSC37469	CG3838	0.633606
TXN502	DRSC18327	CG3847	0.525412
TXN504	DRSC17444	CG3847	-0.298684
TXN506	DRSC26193	CG3847	-0.474164
TXN505	DRSC23126	CG3891	1.35111
TXN503	DRSC14150	CG3909	0.808352
TXN508	DRSC37470	CG3909	0.129042
TXN501	DRSC10389	CG3919	0.38066
TXN508	DRSC37471	CG3919	-0.9003
KP401	DRSC00637	CG3980	0.631613
KP407	DRSC36624	CG3980	-3.3963
KP407	DRSC36625	CG3980	1.1295
TXN501	DRSC15532	CG3995	-1.48187
TXN508	DRSC37472	CG3995	-0.437454
KP403	DRSC18339	CG4041	1.40353
KP404	DRSC26992	CG4041	0.896969
KP402	DRSC07799	CG40410	0.860309
ER/R	DRSC17741	CG4119	-1.33376
TXN504	DRSC18160	CG42499, CG32779	-0.555346
TXN504	DRSC18161	CG42499, CG32779	0.0565662
TXN506	DRSC28554	CG42499, CG32779	1.65672
ER/R	DRSC12567	CG42724	0.540029
TXN501	DRSC06865	CG4282	-0.993546
TXN508	DRSC37473	CG4282	-0.774861
KP403	DRSC18522	CG4290	0.581467
KP406	DRSC36760	CG4290	0.226935
KP406	DRSC36761	CG4290	1.53283
TXN504	DRSC19887	CG4318	1.09676
TXN505	DRSC23146	CG4328	0.0167763
TXN506	DRSC28606	CG4328	0.0809296
TXN503	DRSC15566	CG4360	0.797482
TXN507	DRSC30049	CG4360	0.281919
TXN503	DRSC15570	CG4374	-0.989012
TXN506	DRSC27482	CG4374	1.67775
TXN507	DRSC23956	CG4404	1.97803	1.87458
TXN508	DRSC37474	CG4404	1.57348
TXN502	DRSC15576	CG4424	1.16061
TXN508	DRSC37476	CG4424	1.36579
KP402	DRSC10419	CG4446	0.718913
TXN502	DRSC02753	CG4496	1.49046
TXN508	DRSC37477	CG4496	-0.457904
KP402	DRSC15593	CG4546	0.291983
KP405	DRSC29584	CG4546	2.00067
KP408	DRSC29584	CG4546	-0.225338
TXN504	DRSC18368	CG4557	0.794382
TXN507	DRSC30004	CG4557	-1.21682
TXN504	DRSC18372	CG4575	0.381916
TXN509	DRSC23828	CG4617	-0.286493
TXN509	DRSC37999	CG4617	-0.507392
KP402	DRSC00659	CG4629	0.765988
KP404	DRSC27952	CG4629	0.349599
TXN501	DRSC00660	CG4644	1.84657
TXN508	DRSC37478	CG4644	0.351198
TXN501	DRSC04483	CG4707	1.43166
TXN508	DRSC37479	CG4707	-0.0469166
TXN503	DRSC15633	CG4730	-0.0947864
TXN505	DRSC24561	CG4730	0.22056
KP403	DRSC15634	CG4733	0.633229
KP407	DRSC36732	CG4733	0.0828529
KP407	DRSC36733	CG4733	0.299918
TXN503	DRSC15654	CG4820	-0.773584
TXN508	DRSC37480	CG4820	0.76079
KP401	DRSC02783	CG4839	0.660107
KP402	DRSC02784	CG4839	-0.379549
TXN503	DRSC15663	CG4854	-0.346117
TXN506	DRSC27454	CG4854	0.668107
TXN503	DRSC10458	CG4914	-1.94167
TXN508	DRSC37481	CG4914	0.559964
TXN502	DRSC01924	CG4935	2.55823
TXN508	DRSC37482	CG4935	1.67917
TXN502	DRSC15680	CG4936	1.87831
TXN508	DRSC37483	CG4936	-0.450265
KP401	DRSC06904	CG4945	0.589847
KP405	DRSC29644	CG4945	0.610247
KP408	DRSC29644	CG4945	0.525182
KP401	DRSC10470	CG5026	-0.0767565
KP407	DRSC36681	CG5026	-2.18121
KP407	DRSC36682	CG5026	0.199911
KP402	DRSC10483	CG5144	0.441082
KP404	DRSC23349	CG5144	1.35128
KP404	DRSC28762	CG5144	1.28289
TXN501	DRSC10485	CG5147	0.0859656
TXN507	DRSC29157	CG5147	1.11523
KP401	DRSC10486	CG5150	1.00191
KP407	DRSC36680	CG5150	3.78959	2.991
TXN503	DRSC10489	CG5161	1.76662
KP402	DRSC15729	CG5169	0.375779
KP407	DRSC36723	CG5169	-3.58896
TXN503	DRSC15750	CG5245	0.356785
TXN507	DRSC29337	CG5245	1.44681
TXN501	DRSC15769	CG5319	1.36639
TXN506	DRSC27206	CG5319	0.255361
KP402	DRSC15781	CG5361	0.773414
KP407	DRSC36709	CG5361	0.00092871
TXN501	DRSC01992	CG5366	0.123019
TXN508	DRSC37484	CG5366	0.34829
TXN502	DRSC15786	CG5382	2.23854
TXN508	DRSC37485	CG5382	-0.426963
KP403	DRSC15816	CG5483	0.713561
KP404	DRSC21971	CG5483	2.15416	2.17532
KP404	DRSC26140	CG5483	1.36308	1.01738
KP405	DRSC15816	CG5483	0.14281
KP407	DRSC36734	CG5483	1.97724
KP407	DRSC36735	CG5483	0.173548
KP408	DRSC15816	CG5483	0.0727839
TXN501	DRSC04515	CG5591	1.48141
TXN502	DRSC04291	CG5591	6.47793	2.01939
KP402	DRSC10527	CG5626	0.0350236
KP404	DRSC27583	CG5626	0.470129
TXN501	DRSC15852	CG5641	2.05379
TXN508	DRSC37486	CG5641	-0.341576
KP401	DRSC11781	CG5656	0.667742
KP407	DRSC36698	CG5656	0.384196
TXN505	DRSC23206	CG5669	-0.296065
TXN508	DRSC37487	CG5669	0.0525826
TXN502	DRSC02881	CG5708	4.85809
TXN508	DRSC37488	CG5708	-1.01722
KP401	DRSC06951	CG5757	0.225837
KP407	DRSC36660	CG5757	1.27846
KP401	DRSC02896	CG5790	-0.324564
KP404	DRSC26201	CG5790	1.36384
KP403	DRSC15953	CG6036	-0.193927
KP404	DRSC23322	CG6036	0.724679
KP401	DRSC10590	CG6114	0.462114
KP407	DRSC36694	CG6114	0.257029
KP407	DRSC36695	CG6114	-2.62977
TXN501	DRSC06967	CG6197	0.283856
TXN506	DRSC27505	CG6197	1.99076
TXN501	DRSC16002	CG6254	-0.873544
TXN508	DRSC37489	CG6254	0.154826
TXN503	DRSC10612	CG6272	0.206521
TXN501	DRSC16007	CG6276	0.644786
TXN506	DRSC27870	CG6276	-0.878203
KP401	DRSC07412	CG6355, CG33981	-0.0178497
KP404	DRSC28045	CG6355, CG33981	0.86612
KP406	DRSC36797	CG6355, CG33981	-2.18572
KP407	DRSC36588	CG6355, CG33981	0.189018
KP403	DRSC16028	CG6364	2.16056	3.12088
KP407	DRSC36742	CG6364	1.65084
KP402	DRSC02950	CG6380	0.845858
KP407	DRSC36633	CG6380	1.18219
KP401	DRSC10655	CG6498	1.09029
KP405	DRSC29525	CG6498	1.02315
KP408	DRSC29525	CG6498	-5.39993
TXN501	DRSC16084	CG6654	-1.72651
TXN508	DRSC37490	CG6654	0.221515
KP401	DRSC16085	CG6656	1.35556
KP407	DRSC36737	CG6656	0.137949
KP407	DRSC36738	CG6656	-0.217367
TXN509	DRSC10694	CG6683	0.604541
TXN509	DRSC25674	CG6683	-0.720972
TXN501	DRSC02979	CG6686	-1.52371
TXN506	DRSC27705	CG6686	0.676994
TXN508	DRSC37491	CG6686	-2.4882	-4.00039
TXN501	DRSC16095	CG6689	-2.72818
TXN506	DRSC28313	CG6689	1.44205
TXN502	DRSC07009	CG6751	1.02343
TXN508	DRSC37492	CG6751	0.24351
TXN503	DRSC10706	CG6765	0.138622
TXN505	DRSC24612	CG6765	-0.121875
TXN501	DRSC16118	CG6791	0.187631
TXN507	DRSC29079	CG6791	1.85442
TXN501	DRSC02994	CG6792	-0.188566
TXN508	DRSC37493	CG6792	0.306774
KP403	DRSC16119	CG6800	0.0273287
KP401	DRSC07011	CG6805	0.0403964
KP405	DRSC29352	CG6805	0.327607
KP408	DRSC29352	CG6805	0.275258
TXN503	DRSC16121	CG6808	0.816547
TXN503	DRSC14934	CG6808, CG14711	1.16468
TXN503	DRSC14934	CG6808, CG14711	-2.7546
TXN506	DRSC23982	CG6808, CG14711	1.67732
TXN506	DRSC23982	CG6808, CG14711	0.85437
TXN503	DRSC16122	CG6813	1.02723
TXN508	DRSC37494	CG6813	-0.351869
TXN503	DRSC10725	CG6843	0.644631
TXN507	DRSC29943	CG6843	0.482713
TXN501	DRSC10728	CG6854	1.0358
TXN503	DRSC10729	CG6854	2.48033	3.10824
TXN504	DRSC09342	CG6854	1.71304
TXN501	DRSC08577	CG6905	0.144685
TXN503	DRSC08687	CG6905, Roc1b	1.60891
TXN506	DRSC26879	CG6905, Roc1b	0.812841
TXN503	DRSC16917	CG6937, btn	1.10115
KP401	DRSC08144	CG7028	0.107254
KP404	DRSC27510	CG7028	-0.299187
TXN509	DRSC16181	CG7045	-0.272026
TXN503	DRSC16182	CG7046	0.93519
TXN503	DRSC16186	CG7056	0.19523
TXN507	DRSC29035	CG7056	1.47241
KP401	DRSC16188	CG7069	0.981507
KP407	DRSC36739	CG7069	1.58548
KP407	DRSC36740	CG7069	1.11136
KP402	DRSC03005	CG7094	-0.183317
KP405	DRSC29956	CG7094	3.01022
KP408	DRSC29956	CG7094	-0.8594
KP402	DRSC07014	CG7097	-0.195844
KP402	DRSC07015	CG7097	0.463991
KP402	DRSC07016	CG7097	-0.00253888
KP404	DRSC28168	CG7097	1.06699
TXN501	DRSC03006	CG7099	-0.757997
TXN506	DRSC27321	CG7099	0.577616
TXN502	DRSC20023	CG7101	0.0747269
TXN504	DRSC22845	CG7101	2.24882
TXN508	DRSC37495	CG7101	0.43677
KP402	DRSC02000	CG7115	0.312155
KP405	DRSC29878	CG7115	1.23372
KP408	DRSC29878	CG7115	1.04312
KP402	DRSC03013	CG7134	-0.439203
KP404	DRSC26430	CG7134	1.05039
KP401	DRSC16207	CG7156	0.720345
KP404	DRSC27345	CG7156	2.02337
KP407	DRSC36726	CG7156	-1.50225
KP402	DRSC03021	CG7180	0.598732
KP407	DRSC36634	CG7180	-0.637836
KP407	DRSC36635	CG7180	1.75263
KP401	DRSC09674	CG7207	0.499107
KP406	DRSC36789	CG7207	-2.03242
KP406	DRSC36790	CG7207	2.25036
KP402	DRSC03037	CG7236	-1.10364
KP404	DRSC26976	CG7236	1.02559
GEFGAP	DRSC10066	CG7323	0.857177
TXN502	DRSC16234	CG7357	1.14943
KP402	DRSC16236	CG7362	0.484485
KP405	DRSC29548	CG7362	-0.262415
KP407	DRSC36718	CG7362	0.923747
KP408	DRSC29548	CG7362	-1.44676
TXN504	DRSC22821	CG7368	0.718914
TXN507	DRSC10826	CG7368	-0.0351301
TXN507	DRSC29098	CG7368	1.18062
TXN501	DRSC10827	CG7372	1.63481
TXN507	DRSC29714	CG7372	1.09099
ER/R	DRSC10828	CG7375	-0.987526
KP403	DRSC20041	CG7378	0.27646
KP407	DRSC36616	CG7378	0.717612
TXN503	DRSC10832	CG7386	1.8077
TXN507	DRSC29368	CG7386	1.02256
KP401	DRSC10857	CG7497	-0.0802824
KP404	DRSC28188	CG7497	1.59047
KP401	DRSC11836	CG7597	0.550794
KP404	DRSC23323	CG7597	2.44201
KP405	DRSC29623	CG7597	4.42166	2.54083
KP408	DRSC29623	CG7597	-0.608837
TXN501	DRSC11836	CG7597	0.396589
TXN505	DRSC23323	CG7597	-0.678076
TXN507	DRSC29623	CG7597	-1.11395
KP402	DRSC10890	CG7616	-0.552784
KP407	DRSC36684	CG7616	-4.33191
KP407	DRSC36685	CG7616	1.56769
TXN503	DRSC16287	CG7691	0.016682
TXN508	DRSC37497	CG7691	0.213627
TXN509	DRSC23103	CG7745	-1.24748
TXN509	DRSC29591	CG7745	1.37178
TXN502	DRSC07045	CG7786	1.8882
TXN506	DRSC26604	CG7786	0.027709
TXN503	DRSC10916	CG7804	0.821998
TXN506	DRSC28623	CG7804	0.0106692
TXN501	DRSC03073	CG7818	0.0782217
TXN508	DRSC37498	CG7818	-0.0541213
TXN509	DRSC10921	CG7839	1.33251
TXN509	DRSC38000	CG7839	-0.262259
TXN502	DRSC16349	CG7928	0.804503
TXN508	DRSC37499	CG7928	0.5367
TXN503	DRSC16355	CG7963	-0.651996
TXN508	DRSC37500	CG7963	0.303286
TXN501	DRSC16357	CG7987	1.57393	2.10955
TXN507	DRSC30002	CG7987	1.82614
KP401	DRSC08610	CG7995	-0.450263
KP407	DRSC36677	CG7995	2.75732
KP402	DRSC07062	CG8057	0.0267669
KP404	DRSC21464	CG8057	0.082866
KP404	DRSC23316	CG8057	-0.44948
TXN502	DRSC07074	CG8089	1.15131
TXN508	DRSC37501	CG8089	0.117559
KP403	DRSC20080	CG8105	0.415764
KP407	DRSC36606	CG8105	3.01031
TXN504	DRSC20082	CG8117	0.682142
TXN506	DRSC27713	CG8117	0.894239
TXN504	DRSC20083	CG8119	-0.721646
TXN506	DRSC27407	CG8119	0.649457
TXN503	DRSC16389	CG8145	-0.421688
TXN506	DRSC26026	CG8145	1.33493
TXN503	DRSC16392	CG8159	0.699397
TXN506	DRSC27425	CG8159	2.28094	1.73085
ER/R	DRSC20088	CG8173	0.733296
ER/R	DRSC36823	CG8173	-3.75986
KP403	DRSC20088	CG8173	0.59468
KP407	DRSC36613	CG8173	-0.381672
KP403	DRSC23019	CG8179	0.960669
KP404	DRSC25838	CG8179	0.403956
KP407	DRSC36654	CG8179	-2.41714
KP407	DRSC36655	CG8179	2.48579
TXN509	DRSC07112	CG8216	2.62851
ER/R	DRSC07119	CG8237	0.874509
ER/R	DRSC16400	CG8273	-0.532091
KP402	DRSC16404	CG8286	0.28101
KP404	DRSC27012	CG8286	1.04149
TXN501	DRSC07135	CG8290	0.675072
TXN506	DRSC26133	CG8290	0.519212
KP402	DRSC07138	CG8298	0.197036
KP407	DRSC36649	CG8298	-1.43452
KP407	DRSC36650	CG8298	1.11786
TXN503	DRSC16405	CG8301	-1.91563
TXN506	DRSC28170	CG8301	0.112632
TXN503	DRSC16407	CG8319	-0.767268
TXN505	DRSC24607	CG8319	-1.12438
TXN503	DRSC16412	CG8359	0.376982
TXN508	DRSC37503	CG8359	0.971984
TXN502	DRSC07157	CG8388	0.568757
TXN508	DRSC37504	CG8388	0.733497
TXN503	DRSC16427	CG8478	1.12558
TXN508	DRSC37505	CG8478	0.105524
KP401	DRSC07192	CG8485	0.619246
KP404	DRSC23332	CG8485	0.285492
KP402	DRSC20109	CG8509	0.0405365
KP407	DRSC36607	CG8509	1.21824
GEFGAP	DRSC20111	CG8557	0.0135017
KP403	DRSC20112	CG8565	0.150348
KP407	DRSC36608	CG8565	-1.59036
KP407	DRSC36609	CG8565	0.113673
TXN502	DRSC20114	CG8578	0.451621
TXN508	DRSC37506	CG8578	0.38417
ER/R	DRSC16441	CG8630	-1.44467
TXN509	DRSC07225	CG8632	-0.579524
TXN509	DRSC38001	CG8632	0.361663
KP401	DRSC07250	CG8726	0.513996
KP404	DRSC26566	CG8726	1.1319
TXN509	DRSC23043	CG8765	-0.347441
TXN509	DRSC26371	CG8765	1.17999
KP401	DRSC11046	CG8789	0.113149
KP403	DRSC09626	CG8789	0.351293
KP403	DRSC21373	CG8789	1.46391
KP402	DRSC16451	CG8866	0.408136
KP405	DRSC29838	CG8866	-0.0562389
KP408	DRSC29838	CG8866	-0.11955
TXN503	DRSC16452	CG8870	0.752224
TXN508	DRSC37507	CG8870	-0.64864
KP402	DRSC05953	CG8878	0.876748
KP406	DRSC36783	CG8878	-0.426407
KP406	DRSC36784	CG8878	0.29353
TXN504	DRSC23027	CG8924	0.00338074
TXN508	DRSC37508	CG8924	0.750936
TXN505	DRSC23741	CG8944	-0.27373
TXN508	DRSC37509	CG8944	0.686378
TXN501	DRSC07300	CG8950	3.50455
TXN508	DRSC37510	CG8950	0.153709
TXN502	DRSC20153	CG9104	1.38638
TXN508	DRSC37511	CG9104	-1.28232
TXN501	DRSC08628	CG9139	0.73943
TXN507	DRSC29819	CG9139	1.19857
TXN504	DRSC20171	CG9215	0.462264
TXN508	DRSC37512	CG9215	0.072067
KP402	DRSC03158	CG9222	-0.0259636
KP402	DRSC04535	CG9236	0.577458
KP407	DRSC36663	CG9236	-2.63136
KP402	DRSC11055	CG9238	-0.134982
KP407	DRSC36692	CG9238	2.74716
KP407	DRSC36693	CG9238	0.0232728
TXN501	DRSC03192	CG9305	-0.699685
TXN507	DRSC28804	CG9305	2.36832
KP401	DRSC11065	CG9311	-0.00092507
KP404	DRSC28489	CG9311	1.04254
KP402	DRSC03202	CG9326	0.452292
KP407	DRSC36642	CG9326	-0.188999
TXN501	DRSC04554	CG9418	-0.589338
TXN505	DRSC25355	CG9418	1.23958
TXN501	DRSC04555	CG9437	-0.468831
KP402	DRSC11075	CG9452	0.811914
KP404	DRSC23344	CG9452	0.549696
TXN506	DRSC26447	CG9571	0.758064
TXN502	DRSC20199	CG9609	2.26808	1.42038
TXN506	DRSC26952	CG9609	0.292091
KP401	DRSC11081	CG9619	0.620084
KP407	DRSC36696	CG9619	-1.14678
KP407	DRSC36697	CG9619
TXN504	DRSC17507	CG9650	1.25504
TXN505	DRSC25005	CG9650	-0.761549
TXN508	DRSC37513	CG9650	-1.08366
TXN501	DRSC11094	CG9705	1.70212	1.53403
TXN508	DRSC37514	CG9705	0.152147
TXN501	DRSC12585	CG9727	0.177073
TXN507	DRSC28868	CG9727	1.43888
KP401	DRSC16553	CG9746	0.585104
KP407	DRSC36707	CG9746	0.230957
KP407	DRSC36708	CG9746	1.23043
KP403	DRSC20210	CG9784	-0.149648
KP404	DRSC28204	CG9784	0.0830514
TXN503	DRSC16564	CG9793	-0.528669
TXN507	DRSC29605	CG9793	0.953655
TXN501	DRSC16566	CG9797	2.38578	1.85095
TXN507	DRSC29073	CG9797	1.92518
TXN502	DRSC04586	CG9876	2.38688
TXN508	DRSC37515	CG9876	1.02681
TXN502	DRSC04590	CG9890	3.33054
TXN505	DRSC25594	CG9890	-0.950832
TXN502	DRSC04593	CG9895	2.82628
TXN507	DRSC30003	CG9895	-0.628124
KP402	DRSC00738	CG9961	0.813917
KP404	DRSC23343	CG9961	0.615173
KP404	DRSC25842	CG9961	1.23686
KP402	DRSC00739	CG9962	-0.175543
KP404	DRSC27772	CG9962	0.314443
TXN501	DRSC00745	Chd1	-0.742045
TXN508	DRSC37516	Chd1	-1.16725	0.00292811
TXN503	DRSC11114	Chd3	0.315341
TXN505	DRSC23701	Chd3	-1.69609	-0.500398
TXN504	DRSC18447	CHES-1-like	0.457517
TXN508	DRSC37517	CHES-1-like	0.0524136
TXN501	DRSC04602	Chi	-1.3606
TXN506	DRSC28484	Chi	0.684361
TXN502	DRSC00485	chinmo	3.89692	4.21002
TXN502	DRSC00509	chinmo	2.50727
TXN505	DRSC22413	chinmo	0.604642
TXN506	DRSC28547	chinmo	1.91584
TXN501	DRSC03341	chm	-0.629459
TXN505	DRSC24941	chm	-0.475855
TXN501	DRSC06086	chn	0.197224
TXN507	DRSC29342	chn	-0.0891233
TXN501	DRSC11630	Chro	1.72021	2.11103
TXN508	DRSC37518	Chro	0.740921
TXN504	DRSC17172	ci	-0.405264
TXN508	DRSC37519	ci	0.790481
TXN504	DRSC21243	cic	-0.414363
TXN505	DRSC25516	cic	-0.710368
KP403	DRSC20231	CkIalpha	0.573214
KP403	DRSC22609	CkIalpha	0.7965
KP403	DRSC23308	CkIalpha	-0.120535
KP404	DRSC25564	CkIalpha	0.644142
KP402	DRSC11946	CkIIalpha	1.2951
KP407	DRSC36781	CkIIalpha	-0.783292
TXN503	DRSC11115	CkIIalpha-i1	0.177595
TXN508	DRSC37520	CkIIalpha-i1	-0.184486
KP403	DRSC20230	CkIIbeta	-0.156756
KP402	DRSC07361	CkIIbeta2	0.646739
KP406	DRSC36774	CkIIbeta2	2.71572
KP401	DRSC03292	Cks30A	-0.119881
KP406	DRSC36661	Cks30A	-0.623365
TXN503	DRSC11117	Clk	0.897315
TXN508	DRSC37521	Clk	-0.304313
TXN502	DRSC15289	cnc	3.03749
TXN503	DRSC15600	cnc	0.352081
TXN503	DRSC15601	cnc	-0.0780914
ER/R	DRSC07242	Coil	-0.897289
TXN502	DRSC04138	comr	0.616162
TXN508	DRSC37522	comr	-0.259535
TXN502	DRSC19881	CoRest	1.62274
TXN505	DRSC22305	CoRest	0.0157228
TXN504	DRSC22988	corto	0.885647
TXN505	DRSC25778	corto	1.2195
TXN501	DRSC16607	Cp190	4.34614	3.11201
TXN508	DRSC37523	Cp190	-0.25187
TXN506	DRSC26079	CR33987	1.73974	0.0029281
TXN502	DRSC18387	CR40450, CG32767	2.07301
TXN507	DRSC37377	CR40580	1.17822
TXN502	DRSC03513	crc	3.2468	4.12009
TXN508	DRSC37524	crc	1.86643
TXN501	DRSC11122	CrebA	1.27683
TXN508	DRSC37525	CrebA	-0.475466
TXN505	DRSC23558	CrebB-17A	0.531266
TXN503	DRSC16595	CREG	0.244694
TXN504	DRSC22882	Crg-1, CR42205	0.287092
TXN507	DRSC29136	Crg-1, CR42205	-0.419829
TXN507	DRSC29346	croc	1.14131
TXN501	DRSC03514	crol	-0.229657
TXN504	DRSC21348	crol	1.40067
TXN506	DRSC26800	crol	0.685853
TXN502	DRSC03515	crp	1.99206
TXN508	DRSC37526	crp	-0.540838
KP403	DRSC23272	Csk	0.846912
KP404	DRSC26697	Csk	0.934971
KP407	DRSC36711	Csk	-0.124447
KP407	DRSC36712	Csk	1.12389
TXN505	DRSC22381	CSN5	0.756614
TXN506	DRSC27904	CSN5	1.19468
KP401	DRSC02257	CSN8	0.566367
KP403	DRSC18756	csw	1.4459
KP404	DRSC23326	csw	1.78735
KP406	DRSC36599	csw	-0.105876
KP406	DRSC36600	csw	1.98161	1.7802
TXN504	DRSC18757	ct	1.26379
TXN505	DRSC25100	ct	-0.811981
TXN501	DRSC11004	CTCF	0.511419
TXN506	DRSC28022	CTCF	0.180549
TXN508	DRSC37438	cwo	-0.0762328
TXN508	DRSC37439	cwo	-0.339107
TXN503	DRSC11337	cyc	0.662182
TXN508	DRSC37527	cyc	0.0780156
KP401	DRSC11123	CycA	0.494964
KP403	DRSC09132	CycA	-0.89241
KP407	DRSC36782	CycA	-0.993268	-1.32385
KP401	DRSC04605	CycB	0.160453
KP407	DRSC36783	CycB	-0.732647
KP401	DRSC16619	CycC	1.60685
KP406	DRSC36640	CycC	2.78367	3.12009
TXN501	DRSC16619	CycC	1.54262
KP403	DRSC20233	CycD	3.52646
KP404	DRSC25031	CycD	3.65856	6.12009
KP401	DRSC03295	CycE	1.50653
KP402	DRSC03296	CycE	2.38444	4.21002
KP401	DRSC14324	CycG	1.10894
KP403	DRSC14324	CycG	0.393602
KP404	DRSC23345	CycG	1.48018	0.209298
KP407	DRSC36752	CycG	0.848536
KP402	DRSC11861	CycH	0.967327
KP403	DRSC21308	CycH	0.903458
TXN503	DRSC11861	CycH	0.880937
TXN504	DRSC21308	CycH	0.50529
TXN508	DRSC37528	CycH	0.56681
KP401	DRSC08653	CycJ	0.686575
KP405	DRSC29329	CycJ	3.10135
KP408	DRSC29329	CycJ	0.522368
TXN501	DRSC08653	CycJ	-0.981981
TXN507	DRSC29329	CycJ	0.0851685
KP401	DRSC03714	CycK	0.477565
KP406	DRSC36762	CycK	1.12191
TXN501	DRSC03714	CycK	0.272444
KP401	DRSC11124	CycT	0.0877342
KP403	DRSC23304	CycT	-0.742929
KP405	DRSC29416	CycT	0.547763
KP406	DRSC36756	CycT	-1.4026
KP406	DRSC36757	CycT
KP408	DRSC29416	CycT	0.18177
TXN505	DRSC23304	CycT	-2.23267
TXN507	DRSC29416	CycT	-2.37846	-3.11102
TXN502	DRSC20234	Cyp1	2.27286	3.11675
TXN506	DRSC27284	Cyp1	1.64242
TXN503	DRSC11132	D	0.139207
TXN505	DRSC25367	D	1.56111
TXN501	DRSC11133	D19A	0.713546
TXN506	DRSC26967	D19A	0.512962
TXN503	DRSC11134	D19B	1.84226
TXN505	DRSC25382	D19B	-1.5865
TXN501	DRSC04881	d4	-0.372554
TXN504	DRSC22674	d4	-0.420135
TXN506	DRSC26581	d4	0.0445966
TXN502	DRSC03517	da	1.21734
TXN508	DRSC37529	da	1.47174
TXN502	DRSC03518	dac	2.25154
TXN508	DRSC37530	dac	0.118494
TXN501	DRSC16642	Dad	1.94093	-0.0333829
TXN506	DRSC28345	Dad	0.833205
KP401	DRSC16643	Dak1	0.943261
KP407	DRSC36589	Dak1	0.273813
TXN502	DRSC18419	dalao	-1.90391
TXN507	DRSC18419	dalao	-2.10951	-1.85562
TXN507	DRSC28822	dalao	0.101672
KP401	DRSC07601	dap	0.695034
KP406	DRSC36662	dap	-1.38774	0.891118
KP406	DRSC36663	dap	-0.773107
KP401	DRSC16929	dco	0.638977
KP405	DRSC29211	dco	0.413535
KP407	DRSC36788	dco	0.839248
KP408	DRSC29211	dco	-0.0913536
KP402	DRSC02150	Ddr	0.616475
KP402	DRSC03229	Ddr	0.997866
KP402	DRSC03230	Ddr	0.666759
KP403	DRSC22818	Ddr	0.684411
KP405	DRSC03229	Ddr	-0.0422037
KP408	DRSC03229	Ddr	-1.57019
TXN506	DRSC25984	Deaf1	1.41669
TXN507	DRSC04965	debcl	0.696762
TXN509	DRSC30010	debcl	-0.554971
TXN502	DRSC16931	dei	1.40147
TXN506	DRSC27383	dei	1.18626
TXN509	DRSC23928	Dek	0.196768
TXN509	DRSC38002	Dek	0.599928
TXN508	DRSC37531	Df31	-3.8432	-2.11292
ER/R	DRSC03207	dFAST	0.403481
TXN503	DRSC12593	Dfd	-1.11102
TXN506	DRSC27981	Dfd	0.406417
KP402	DRSC06782	Dgk	0.812453
KP403	DRSC05064	Dgk	0.0436081
KP403	DRSC05065	Dgk	-0.120135
KP404	DRSC25166	Dgk	0.375274
KP405	DRSC06782	Dgk	0.726457
KP408	DRSC06782	Dgk	-0.154526
KP401	DRSC07399	Dgkepsilon	0.983549
KP406	DRSC36733	Dgkepsilon	0.871821
TXN502	DRSC03316	Dif	1.90045
TXN502	DRSC02442	Dif, CG15141	3.48697
TXN504	DRSC20321	dik	2.14097
TXN504	DRSC20322	dik	0.0458
TXN502	DRSC03100	dimm	0.514151
TXN508	DRSC37532	dimm	0.37832
TXN506	DRSC27354	DIP1	-0.106085
TXN509	DRSC12346	Dip2	0.646215
TXN503	DRSC07401	Dip3	0.545059
TXN507	DRSC29615	Dip3	-0.343505
TXN505	DRSC25113	disco	-0.482238
TXN504	DRSC20173	disco-r	0.288729
TXN504	DRSC20174	disco-r	1.00842
TXN502	DRSC03521	dl	2.05245	1.65029
TXN507	DRSC29023	dl	-0.481094
KP401	DRSC20324	dlg1	0.527494
KP403	DRSC18896	dlg1	0.52931
KP403	DRSC19767	dlg1	0.285127
KP405	DRSC29546	dlg1	1.84181
KP407	DRSC36787	dlg1	0.888429
KP408	DRSC29546	dlg1	0.28325
TXN502	DRSC04610	Dll	3.19629	2.90187
TXN506	DRSC27225	Dll	0.926871
TXN503	DRSC08705	dlt	1.0757
TXN506	DRSC26168	dlt	1.64279
TXN505	DRSC23360	dm	5.3384
TXN508	DRSC37533	dm	0.351259
TXN505	DRSC23784	dmrt11E	0.0415776
TXN503	DRSC15865	dmrt93B	-1.97613	0.00085742
TXN507	DRSC29931	dmrt93B	-0.277257
TXN505	DRSC25777	dmrt99B	-0.418018
KP403	DRSC16933	dnk	1.00813
KP405	DRSC29240	dnk	2.62041
KP408	DRSC29240	dnk	2.01669
KP401	DRSC03522	dnt	0.0210512
KP404	DRSC25886	dnt	0.459194
KP406	DRSC36749	dnt	0.941528
ER/R	DRSC13892	doa	0.378551
ER/R	DRSC13895	doa	1.04637
KP401	DRSC16650	Doa	3.87357	4.11193
KP403	DRSC13892	Doa	0.750584
KP403	DRSC13893	Doa	0.250362
KP403	DRSC13896	Doa	2.07794
KP406	DRSC36602	Doa	1.36861
KP406	DRSC36603	Doa	0.363067
TXN503	DRSC11146	Doc1	-0.665404
TXN505	DRSC25859	Doc1	-0.295284
TXN504	DRSC22716	Doc2	-1.00592
TXN505	DRSC25293	Doc2	0.49002
TXN503	DRSC10480	Doc3	0.821982
TXN506	DRSC28205	Doc3	1.45451
KP402	DRSC19583	dome	1.22229
KP407	DRSC36769	dome	-0.634011
KP407	DRSC36770	dome	1.11729
ER/R	DRSC07402	Dp	3.3444
ER/R	DRSC37534	Dp	5.82685
TXN501	DRSC07402	Dp	9.23735	7.55982
TXN502	DRSC00472	dp	2.78771
TXN504	DRSC00233	dp	2.04748	1.32033
TXN504	DRSC00234	dp	1.02535
TXN508	DRSC37534	Dp	6.83804
TXN502	DRSC07605	dpn	3.44595
TXN506	DRSC28443	dpn	0.0782797
KP402	DRSC00813	dpp	0.548164
KP403	DRSC00118	dpp	-0.566541
KP403	DRSC00121	dpp	0.781927
KP404	DRSC26853	dpp	1.19891
KP407	DRSC36785	dpp	0.865376
ER/R	DRSC22708	Dr	1.89275	3.11092
TXN504	DRSC22708	Dr	1.59903
TXN501	DRSC03319	Dref	0.310451
TXN508	DRSC37535	Dref	0.0734596
KP401	DRSC03523	drl	0.833989
KP404	DRSC28564	drl	1.61271
KP402	DRSC06155	Drl-2	0.000847903
KP402	DRSC06858	Drl-2	-0.557291
KP403	DRSC05393	Drl-2	0.71011
KP407	DRSC36652	Drl-2	0.410983
KP407	DRSC36653	Drl-2	-3.15498
TXN502	DRSC00277	drm	2.80101
TXN508	DRSC37536	drm	0.0805098
TXN505	DRSC23510	dsf	0.188259
TXN508	DRSC37537	dsf	-0.555955
KP401	DRSC18462	Dsor1	0.592618
KP404	DRSC27547	Dsor1	1.23219
TXN504	DRSC23078	Dsp1	0.538585
TXN506	DRSC28760	Dsp1	0.00178408
ER/R	DRSC07698	dStau	1.90781
ER/R	DRSC34478	dStau	2.95986	2.10098
TXN504	DRSC12649	dsx	-0.484099
TXN506	DRSC26707	dsx	1.61744
TXN502	DRSC04680	dve	0.503677
TXN506	DRSC28692	dve	0.187183
TXN502	DRSC18766	dwg	0.82816
TXN507	DRSC29174	dwg	2.45851
TXN503	DRSC14529	dys	-0.180971
TXN503	DRSC14896	dys	-0.0742584
TXN501	DRSC08583	E(bx)	-0.906289
TXN503	DRSC08172	E(bx)	-1.44731	-1.93029
TXN503	DRSC08509	E(bx)	-2.40182	-3.20009
TXN502	DRSC07408	E(Pc)	0.496436	1.50293
TXN504	DRSC05281	E(Pc)	1.94429	1.76781
TXN502	DRSC18768	e(r)	-0.536894
ER/R	DRSC16654	E(spl)	0.547276
ER/R	DRSC28065	E(spl)	0.532982
TXN503	DRSC16654	E(spl)	0.0375677
TXN506	DRSC28065	E(spl)	1.14124
TXN505	DRSC23242	E(var)3-9	-0.890896
TXN507	DRSC29480	E(var)3-9	-0.319405
TXN502	DRSC20326	e(y)1	2.09729
TXN505	DRSC25903	e(y)1	6.14145	4.34014
TXN504	DRSC19640	e(y)2	0.177044
TXN509	DRSC11147	E(z)	0.421824
TXN509	DRSC29388	E(z)	-0.840393
TXN503	DRSC16655	E2f	3.95131	2.10919
TXN507	DRSC29572	E2f	1.57345	2.00919
TXN501	DRSC03320	E2f2	1.55536
TXN508	DRSC37538	E2f2	0.491877
TXN505	DRSC23157	E5	-0.327844
TXN506	DRSC28326	E5	0.820603
TXN503	DRSC16939	ea	0.320297
TXN505	DRSC25595	ea	-1.02387
TXN501	DRSC15675	ear	-1.62859	-1.91154
TXN505	DRSC24291	ear	-1.25277
KP403	DRSC20329	eas	0.968813
KP405	DRSC29435	eas	-0.203398
KP407	DRSC36786	eas	1.62869
KP408	DRSC29435	eas	-0.563174
TXN501	DRSC08574	ecd	1.87171
TXN508	DRSC37539	ecd	-0.349663
ER/R	DRSC04906	EcR	-1.31807	0.298101
ER/R	DRSC04910	EcR	0.205325
TXN501	DRSC04910	EcR	0.800604
TXN502	DRSC04906	EcR	0.813874
KP402	DRSC07409	EDTP	0.372563
KP406	DRSC36785	EDTP	-1.33837
KP406	DRSC36786	EDTP	2.48416
ER/R	DRSC03737	Ef2b	1.35994
TXN503	DRSC11885	eg	-0.273753
TXN506	DRSC26147	eg	1.16121
KP401	DRSC04613	Egfr	0.28471
KP403	DRSC03871	Egfr	0.679871
KP406	DRSC36621	Egfr	2.9921	1.7801
KP406	DRSC36622	Egfr	2.27504
TXN506	DRSC28455	egg	1.24127
ER/R	DRSC16938	eIF-3p66	1.42719
ER/R	DRSC16332	eIF2B-alpha	-0.738265
ER/R	DRSC06905	eIF3-S8	1.44733
ER/R	DRSC06900	eIF3-S9	1.33428
KP401	DRSC08658	Eip63E	0.756894
KP406	DRSC36655	Eip63E	-1.22812	-0.873687
TXN503	DRSC11160	Eip74EF	1.5705
TXN505	DRSC23794	Eip74EF	4.29381	3.22928
TXN504	DRSC23047	Eip75B	2.2794	2.11191
TXN508	DRSC37540	Eip75B	1.73691
TXN504	DRSC23097	Eip78C	1.75964	2.19918
TXN504	DRSC23072	Eip93F	1.56196
TXN506	DRSC27506	Eip93F	1.52986	2.29992
TXN504	DRSC01379	elB	1.24931
TXN505	DRSC25039	elB	1.38221
TXN502	DRSC16109	EloA	0.0748899
TXN505	DRSC23920	EloA	-1.73938
TXN503	DRSC16663	Elongin-B	1.46197
TXN508	DRSC37541	Elongin-B	0.837601
TXN503	DRSC07423	Elongin-C	0.215997
TXN507	DRSC29393	Elongin-C	1.71069
TXN505	DRSC23238	emc	1.09549
TXN506	DRSC28439	emc	1.62029	1.52351
TXN505	DRSC25044	ems	0.173321
TXN508	DRSC37542	ems	-0.729271
TXN502	DRSC07609	en	1.67661
TXN505	DRSC25628	en	0.138348
TXN501	DRSC04096	enok	-2.2048
TXN508	DRSC37543	enok	-1.98605	-3.22772
KP403	DRSC17164	Eph	-0.0199589
KP406	DRSC36767	Eph	-0.712718
KP406	DRSC36768	Eph	2.54815
ER/R	DRSC19804	ERj3P	0.560557
ER/R	DRSC22494	ERj3P	-0.335056
ER/R	DRSC01984	ERj5	-0.0273698
ER/R	DRSC08660	ero1	0.896976	1.17542
ER/R	DRSC07718	ERp31	-0.121288
ER/R	DRSC26561	ERp32	0.561967
ER/R	DRSC20215	ERp44	2.03865	3.22928
ER/R	DRSC29891	ERp60	-0.00558987
ER/R	DRSC32447	ERp60	-1.22605	1.25886
ER/R	DRSC07309	ERp70	0.375895
ER/R	DRSC24471	ERp70	-0.573974	1.23252
TXN501	DRSC10840	ERR	0.68352
TXN508	DRSC37544	ERR	0.156101
TXN502	DRSC03530	esg	1.15398
TXN508	DRSC37545	esg	-0.45668
TXN502	DRSC00751	Ets21C	1.41998
TXN508	DRSC37546	Ets21C	-0.329982
TXN501	DRSC10738	Ets65A	1.0362
TXN501	DRSC11164	Ets65A	0.330544
TXN503	DRSC09968	Ets65A	0.417124
TXN503	DRSC16127	Ets96B	-0.212751
TXN506	DRSC27110	Ets96B	0.703967
TXN504	DRSC16665	Ets97D	1.17849
TXN506	DRSC27682	Ets97D	1.39406
TXN505	DRSC24625	Ets98B	-0.373401
ER/R	DRSC40684	eve	0.977356
TXN505	DRSC24980	eve	-0.656701
TXN504	DRSC20330	exd	1.0277
TXN507	DRSC30099	exd	1.20065
TXN503	DRSC10972	exex	-0.75013
TXN505	DRSC24644	exex	0.223844
TXN504	DRSC17173	ey	0.90724
TXN506	DRSC26309	ey	-0.109895
TXN501	DRSC03510	eya	-1.63359
TXN508	DRSC37547	eya	-0.974547
TXN505	DRSC23136	eyg	0.760745
TXN506	DRSC26636	eyg	0.522681
KP402	DRSC07426	Fak56D	0.739735
KP404	DRSC26626	Fak56D	0.910644
KP406	DRSC36729	Fak56D	-0.185827
KP406	DRSC36730	Fak56D	-1.07309
KP404	DRSC29115	fbl	1.18239
KP402	DRSC11886	fbl, CG33969	0.375527
KP404	DRSC27922	fbl, CG33969	0.66862
TXN501	DRSC04121	Fcp1	0.0282843
TXN506	DRSC26715	Fcp1	0.628001
TXN507	DRSC37420	Fcp1	-0.502984
TXN504	DRSC23032	fd3F	1.33938
TXN501	DRSC04685	fd59A	-3.03426
TXN505	DRSC25524	fd59A	0.1558
TXN503	DRSC08717	fd64A	-0.124447
TXN505	DRSC25265	fd64A	-0.348374
TXN503	DRSC16946	fd96Ca	-0.0356579
TXN505	DRSC23974	fd96Ca	2.23445	1.78093
TXN503	DRSC16947	fd96Cb	0.157226
TXN505	DRSC25322	fd96Cb	0.318145
TXN503	DRSC12507	Fer1	0.234875
TXN503	DRSC12555	Fer1	0.38206
TXN507	DRSC29849	Fer1	0.539118
TXN503	DRSC15925	Fer2	0.0246432
TXN508	DRSC37548	Fer2	0.837065
TXN501	DRSC16133	Fer3	-0.145625
TXN504	DRSC16949	fkh	1.39234
TXN506	DRSC28213	fkh	0.503477
KP403	DRSC17992	flw	1.07124
KP403	DRSC18774	flw	0.0815017
KP404	DRSC25161	flw	1.94625
ER/R	DRSC16674	Fmr1	1.36701
ER/R	DRSC26781	Fmr1	-0.834387
KP401	DRSC00818	for	0.851179
KP403	DRSC00195	for	0.576915
KP404	DRSC25103	for	0.754334
KP406	DRSC36604	for	-0.0529882
KP406	DRSC36605	for	-2.07908
TXN501	DRSC15463	foxo	-0.0724622
TXN508	DRSC37549	foxo	0.525099
KP402	DRSC16673	Fps85D	0.214307
KP403	DRSC12735	Fps85D	0.846932
KP405	DRSC29894	Fps85D	4.97361
KP406	DRSC36606	Fps85D	-0.247294
KP408	DRSC29894	Fps85D	-0.525072
ER/R	DRSC16950	fray	0.347989
ER/R	DRSC36742	fray	1.09075
KP403	DRSC16950	fray	0.811303
KP406	DRSC36742	fray	-1.79767
KP406	DRSC36743	fray	0.250339
TXN505	DRSC24960	fru	-2.9607
TXN507	DRSC16953	fru	-0.0642478
KP401	DRSC18778	fs(1)h	1.97874
KP404	DRSC29017	fs(1)h	0.874319
KP405	DRSC18778	fs(1)h	0.970673
KP408	DRSC18778	fs(1)h	-0.109875
ER/R	DRSC03328	Fs(2)Ket	-0.333648
TXN501	DRSC00819	ft	-0.37227
TXN508	DRSC37550	ft	-0.712512
ER/R	DRSC12626	ftz	-0.610214
ER/R	DRSC28088	ftz	-0.0737867
TXN503	DRSC12626	ftz	0.138046
TXN506	DRSC28088	ftz	0.826848
TXN508	DRSC37551	ftz	-0.762156
TXN505	DRSC25015	ftz-f1	0.382254
TXN508	DRSC37552	ftz-f1	0.294453
KP403	DRSC20333	fu	0.172981
KP404	DRSC27965	fu	0.795572
KP406	DRSC36607	fu	0.464072
TXN502	DRSC03324	fu2	0.712002
TXN508	DRSC37553	fu2	-0.246291
ER/R	DRSC17952	Futsch	-0.932978
KP401	DRSC08580	fwd	1.2048
KP404	DRSC26680	fwd	0.823737
KP406	DRSC36636	fwd	-1.77396
KP406	DRSC36637	fwd	2.57793
ER/R	DRSC10087	fz2	1.17632
TXN509	DRSC18619	G9a	-0.626749
TXN509	DRSC37998	G9a	-0.720484
TXN502	DRSC00561	GABA-B-R3	2.2903
TXN507	DRSC29404	GABA-B-R3	0.315668
ER/R	DRSC06033	gadd45	0.691002
TXN501	DRSC03156	Gas41	-2.97614
TXN501	DRSC02803	GATAd	-0.785959
TXN508	DRSC37554	GATAd	-0.621025
TXN505	DRSC23209	GATAe	-0.601361
TXN508	DRSC37555	GATAe	-0.960735
TXN504	DRSC19974	gce	0.817623
TXN505	DRSC25266	gce	0.78992
ER/R	DRSC03536	gcm	0.529779
TXN502	DRSC03536	gcm	1.78359	2.10999
TXN502	DRSC03538	gcm2	0.315414
TXN507	DRSC29823	gcm2	2.47963	1.7899
KP401	DRSC16678	Gcn2	0.300019
KP403	DRSC16678	Gcn2	0.0812443
KP406	DRSC36723	Gcn2	-0.0702968
KP406	DRSC36724	Gcn2	0.931225
GEFGAP	DRSC08318	GEF64c	0.368935
KP401	DRSC04688	gek	0.654846
KP406	DRSC36740	gek	0.0900443
KP406	DRSC36741	gek	-1.33564
TXN501	DRSC06093	gem	-0.591519
TXN502	DRSC06847	gem	2.03243
KP401	DRSC16154	gish	0.309375
KP406	DRSC36673	gish	-0.691307
TXN506	DRSC27242	gl	-0.447362
TXN508	DRSC37556	gl	0.165923
TXN501	DRSC03539	glu	2.59476	3.21093
TXN506	DRSC26151	glu	2.26781
TXN501	DRSC04689	gol	-2.0716	-0.891209
KP402	DRSC04618	Gp150	0.365027
KP404	DRSC29033	Gp150	1.18825
KP401	DRSC16682	Gprk2	-0.00374308
KP403	DRSC16682	Gprk2	-0.125653
KP404	DRSC23336	Gprk2	0.0915825
KP406	DRSC36647	Gprk2	-1.45217
KP406	DRSC36648	Gprk2	0.971852
TXN503	DRSC14593	Gr93a	-0.166729
GEFGAP	DRSC20131	Graf	0.595892
TXN502	DRSC04691	grau	0.638138
TXN506	DRSC27330	grau	-0.585229
TXN501	DRSC07624	grh	2.12264
TXN503	DRSC07625	grh	0.343549
TXN504	DRSC05680	grh	0.86019
TXN505	DRSC25829	grn	0.352057
KP401	DRSC03541	grp, CG31782	0.335575
TXN501	DRSC03541	grp, CG31782	-0.916979
ER/R	DRSC18524	Grp170	-0.444161
ER/R	DRSC15827	Grp93	2.6242	4.29302
ER/R	DRSC27798	Grp93	2.0281
TXN502	DRSC04692	gsb	2.35947
TXN505	DRSC25821	gsb	-0.327467
ER/R	DRSC04021	gsb-n	1.71876
ER/R	DRSC04693	gsb-n	-3.62299
TXN502	DRSC04693	gsb-n	-2.43315
TXN504	DRSC04021	gsb-n	-0.969654
TXN502	DRSC00755	Gsc	2.30882
TXN505	DRSC25752	Gsc	0.222471
ER/R	DRSC07436	GstS1	1.11839
TXN504	DRSC23119	gt	1.12552
TXN506	DRSC28482	gt	1.64526
KP401	DRSC16305	gwl	-0.030896
KP406	DRSC36638	gwl	5.10446	2.89181
KP406	DRSC36639	gwl	2.06699
TXN505	DRSC23249	h	-0.721204
TXN507	DRSC30106	h	-0.0978961
TXN502	DRSC03339	H15	1.51062
TXN505	DRSC25176	H15	1.1638
TXN504	DRSC22555	H2.0	1.23198
TXN502	DRSC02070	ham	1.40856
TXN506	DRSC27582	ham	-0.103212
TXN502	DRSC02656	Hand	1.58089
TXN505	DRSC23216	hang	0.703424
TXN507	DRSC29322	hang	1.39547
TXN501	DRSC11354	hay	0.337113
TXN508	DRSC37557	hay	1.63022	1.8713
TXN501	DRSC16963	hb	-0.225249
TXN506	DRSC27856	hb	1.09777
TXN502	DRSC04239	hbn	0.764137
TXN502	DRSC17143	Hcf	1.59777
TXN508	DRSC37558	Hcf	-0.495112
KP402	DRSC02317	HDC01074	-0.107645
KP407	DRSC36756	HDC11616	0.0164011
KP403	DRSC17556	HDC17960	0.737097
KP403	DRSC17860	HDC17961	0.272689
KP403	DRSC19839	hep	0.729874
KP403	DRSC20337	hep	0.126986
KP404	DRSC26331	hep	-0.0772708
KP406	DRSC36660	hep	-0.422159
ER/R	DRSC14082	heph	0.98992
ER/R	DRSC16783	heph	-0.308824
TXN501	DRSC03543	her	-0.290962
TXN504	DRSC19965	Her	2.11725
TXN508	DRSC37559	Her	-0.437073
TXN508	DRSC37560	her	1.0086
TXN504	DRSC23030	Hey	1.41868
TXN508	DRSC37561	Hey	-0.0443949
TXN503	DRSC11181	HGTX	-0.10353
TXN504	DRSC09319	HGTX	0.890941
TXN505	DRSC23599	hkb	3.20959	2.10918
TXN508	DRSC37562	hkb	0.379913
TXN503	DRSC11182	HLH106	3.40932
TXN508	DRSC37563	HLH106	5.88413	7.12081
TXN504	DRSC18669	HLH3B	0.293456
TXN505	DRSC25447	HLH3B	2.953
TXN505	DRSC25228	HLH4C	0.558409
TXN507	DRSC18670	HLH4C	1.42151
TXN503	DRSC07438	HLH54F	0.632936
TXN508	DRSC37564	HLH54F	-0.747093
ER/R	DRSC28511	HLHm3	-3.34291	0.887843
ER/R	DRSC40434	HLHm3	1.22929
TXN505	DRSC23160	HLHm3	0.446956
TXN506	DRSC28511	HLHm3	1.32553
TXN503	DRSC16695	HLHm5	0.061592
TXN506	DRSC28232	HLHm5	0.439519
TXN503	DRSC16696	HLHm7	0.017402
TXN507	DRSC29451	HLHm7	0.364399
TXN502	DRSC16697	HLHmbeta	1.78362
TXN508	DRSC37565	HLHmbeta	-1.00256
TXN503	DRSC16698	HLHmdelta	-0.715497
TXN503	DRSC16699	HLHmgamma	-1.66799
TXN505	DRSC25532	HLHmgamma	7.22192
TXN507	DRSC04619	HmgD	0.203682
TXN509	DRSC26171	HmgD	0.193224
TXN502	DRSC04620	HmgZ	0.801495
TXN504	DRSC03888	HmgZ	0.020315
TXN504	DRSC17740	Hmr	2.74228	1.2881
TXN508	DRSC37566	Hmr	-0.935872
TXN505	DRSC25028	Hmx	5.79254
TXN504	DRSC03344	Hnf4	2.08472
TXN506	DRSC26864	Hnf4	3.32827	5.12011
KP403	DRSC20340	hop	0.252468
KP404	DRSC23334	hop	1.32589
KP404	DRSC26551	hop	0.954928
TXN504	DRSC18418	HP1b	1.59085
TXN507	DRSC29826	HP1b	0.533163
TXN502	DRSC16166	HP1c	1.98677
TXN506	DRSC28423	HP1c	0.802078
TXN507	DRSC16166	HP1c	0.153689
TXN503	DRSC16379	HP1e	-0.580261
TXN502	DRSC00471	HP6	0.900226
KP401	DRSC06065	hpo	0.454026
KP407	DRSC36661	hpo	0.595866
KP407	DRSC36662	hpo	1.33782
TXN505	DRSC23230	Hr38	0.86603
TXN506	DRSC28077	Hr38	0.0977632
TXN501	DRSC03346	Hr39	-0.507511
TXN506	DRSC26006	Hr39	1.4063
TXN504	DRSC23080	Hr4	1.48265
TXN506	DRSC28298	Hr4	1.84327	1.78102
TXN501	DRSC07441	Hr46	-1.06986
TXN508	DRSC37567	Hr46	-0.955007
TXN502	DRSC06627	Hr51	1.74459	1.64009
TXN504	DRSC22829	Hr51	0.943677
ER/R	DRSC11866	Hr78	0.474652
ER/R	DRSC27893	Hr78	-0.0400895
TXN501	DRSC11866	Hr78	-0.872792
TXN506	DRSC27893	Hr78	0.932005
TXN503	DRSC12521	Hr83	-0.147766
TXN505	DRSC25662	Hr83	0.113238
TXN502	DRSC16707	Hr96	0.363908
[truncated: 1,442 more rows]

## Sheet: list of hits
gene ID	FlyBase ID	Human orthologs
Abl	FBgn0000017	ENSG00000097007 ABL2
Akt1	FBgn0010379	AKT2 ENSG00000118515 SGK3 ENSG00000117020 AKT1 ENSG00000101049
asp	FBgn0000140	ASPM
Bap60	FBgn0025463	SMARCD2 SMARCD3 SMARCD1
bbx, waw	FBgn0024251	ENSG00000114439
bigmax	FBgn0039509	MLXIP ENSG00000009950 MLX
bl	FBgn0015907	HNRPK
br	FBgn0000210	-
Caki	FBgn0013759	CASK
CanA-14F, Pp2B-14D	FBgn0030758	-
Cdk4	FBgn0016131	CDK4 CDK6
Cdk5	FBgn0013762	CDK16 CDK5 CDK17 CDK14 ENSG00000117266
Cenp-C	FBgn0086697	-
CG1024	FBgn0027514	-
CG10260	FBgn0261922	PI4KA
CG10431	FBgn0032730	-
CG11425	FBgn0037167	PPAP2C PPAP2B PPAP2A
CG11426	FBgn0037166	PPAP2C PPAP2B PPAP2A
CG14211	FBgn0031044	DUSP12
CG16778	FBgn0266129	-
CG17806	FBgn0038548	-
CG18854	FBgn0042174	-
CG18854, IP3K1	FBgn0042174	-
CG2116	FBgn0030003	-
CG2129	FBgn0030008	-
CG2712	FBgn0024975	-
CG30020	FBgn0050020	-
CG3008	FBgn0031643	RIOK1 RIOK3
CG3105	FBgn0034950	PASK
CG31716	FBgn0051716	CNOT4
CG4404	FBgn0030432	-
CG5150	FBgn0035620	ALPI ALPPL2 ALPL ALPP
CG5483	FBgn0038816	-
CG5591	FBgn0263667	-
CG6364	FBgn0263398	UCK1 UCK2
CG6854	FBgn0262707	CTPS CTPS2
CG7597	FBgn0037093	ENSG00000136807 CDK12 CDK13
CG7987	FBgn0038244	-
CG8159	FBgn0037619	-
CG9705	FBgn0036661	CSDC2 CARHSP1
CG9797	FBgn0037621	-
chinmo	FBgn0086758	-
Chro	FBgn0044324	-
Cp190	FBgn0000283	-
crc	FBgn0000370	ATF4
csw	FBgn0000382	ENSG00000179295 PTPN6
CycC	FBgn0004597	CCNC
CycD	FBgn0010315	CCND1/3
CycE	FBgn0010382	CCNE2 CCNE1
Cyp1	FBgn0004432	PPID ENSG00000185250 ENSG00000255963 ENSG00000255854 ENSG00000198161 NKTR PPIE PPIAL4D PPIH PPIA PPIF PPIAL4G PPIG
dl	FBgn0260632	p65
Dll	FBgn0000157	-
Doa	FBgn0265998	CLK1 ENSG00000176444 CLK4 CLK3
Dp	FBgn0011763	TFDP3 TFDP2 TFDP1
Dr	FBgn0000492	MSX2
dStau	FBgn0003520	SATUFEN1/2
E(Pc)	FBgn0000581	ENSG00000120616 EPC2
E(Pc)	FBgn0000581	ENSG00000120616 EPC2
e(y)1	FBgn0000617	TAF9B
E2f	FBgn0011766	E2F1
Egfr	FBgn0003731	ERBB3 ENSG00000141736 EGFR ERBB4
Eip74EF	FBgn0000567	ELF1 ELF2 ELF4
Eip75B	FBgn0000568	-
Eip78C	FBgn0004865	-
Eip93F	FBgn0264490	-
emc	FBgn0000575	ID1 ID2 ID3
ERp44	FBgn0014002	PDIA2/PDIA3
fd96Ca	FBgn0004897	FOXI1 FOXE3 FOXB1 FOXD4L6 FOXD4L2 FOXA3 FOXS1 FOXD4L4 FOXL1 FOXD4L5 FOXI2 FOXD4L3 FOXD4L1 FOXC2 FOXD4 FOXB2
gcm	FBgn0014179	-
gcm2	FBgn0019809	-
glu	FBgn0015391	SMC4
Grp93	FBgn0039562	HSP90A1/B1
gwl	FBgn0260399	ENSG00000120539
hay	FBgn0001179	ERCC3
hkb	FBgn0261434	-
HLH106	FBgn0261283	ENSG00000072310 SREBF2
Hnf4	FBgn0004914	HNF4G NR2A1
Hr4	FBgn0264562	-
Hr51	FBgn0034012	NR2E1
Hsc70-3/Gp78	FBgn0001218	HSPA5
Hsromega	FBgn0001234	-
InR	FBgn0013984	IGF1R
IP3K2	FBgn0085388	ITPKC ITPKB ITPKA
ird5	FBgn0024222	IKBKB CHUK
Iswi	FBgn0011604	SMARCA5 ENSG00000102038
jigr1	FBgn0039350	-
kay	FBgn0001297	FOS
knrl	FBgn0001323	-
KP78b	FBgn0026063	ENSG00000072518 ENSG00000075413 MARK4 ENSG00000116141
l(1)G0232	FBgn0028341	PTPN9
MED10	FBgn0036581	MED10
MED20	FBgn0013531	MED20
MED26	FBgn0039923	MED26
mei-41	FBgn0004367	ATR
Mkk4	FBgn0024326	MAP2K3 MAP2K4 MAP2K6 ENSG00000076984
mts	FBgn0004177	PPP6C ENSG00000104695 PPP2CA
Nipped-A	FBgn0053554	TRRAP
Nurf-38	FBgn0016687	PPA2 PPA1
odd	FBgn0002985	OSR2 OSR1
p58alpha
Pcaf	FBgn0020388	KAT2A
pdm2	FBgn0004394	POU3F3 POU3F1 POU3F4 POU3F2 POU2F2 POU1F1 POU2F3 POU5F1P1 POU5F1
Pi3K21B	FBgn0020622	-
Pi3K59F	FBgn0015277	PIK3C3
Pi3K68D	FBgn0015278	PIK3C2A PIK3C2G PIK3C2B
Pk61C	FBgn0020386	PKD
Pkcdelta	FBgn0259680	PRKCQ PRKCD PRKCE PRKCH PRKCA PRKCG PRKCB
PKD	FBgn0038603	PRKD2 PRKD1 PRKD3
Pp2A-29B	FBgn0260439	ENSG00000137713 PPP2R1A
Pp4-19C	FBgn0023177	PPP6C ENSG00000104695 PPP2CA
Qm	FBgn0019662	GGPS1
RACK1	FBgn0020618	RACK1
retn	FBgn0004795	RETN
RhoGAP15b	FBgn0030808	-
RhoGAP19d	FBgn0031118	-
RhoGAP50C
SC35	FBgn0265298	SRSF2 ENSG00000262283 ENSG00000188529 SRSF10 SRSF12
Sirt7	FBgn0039631	SIRT7
Sk1	FBgn0030300	ENSG00000176170 SPHK2
Sk2	FBgn0052484	SPHK2
slik	FBgn0035001	-
Smg1	FBgn0263968	SMG1
Sos	FBgn0001965	SOS2 SOS1
Sox15	FBgn0005613	SOX7
Spt6	FBgn0028982	ENSG00000109111
sqd	FBgn0263396	HNRNPA0 DAZAP1 HNRNPA2B1 ENSG00000197451 HNRNPD MSI2 HNRNPA1L2 ENSG00000135486 HNRNPA3 HNRPDL MSI1
Srp54	FBgn0024285	ENSG00000153914
Ssrp	FBgn0010278	SSRP1
sug	FBgn0033782	ZIC5 GLIS2 ZIC4
Sxc	FBgn0261403	OGT
Taf1	FBgn0010355	TAF1L TAF1
Taf10b, Taf10	FBgn0028398	TAF10
Taf12L	FBgn0031623	TAF12L
Taf4	FBgn0010280	TAF4 TAF4B
Tango4	FBgn0030365	ENSG00000171566
Tfb4	FBgn0031309	GTF2H3
Tor	FBgn0021796	MTOR
Trio	FBgn0024277	TRIO
wdn	FBgn0005642	-
xbp1	FBgn0021872	XBP1
Xpd	FBgn0261850	ERCC2
ash1	FBgn0005386	ASH1L
ATG1	FBgn0260945
ATG18	FBgn0035850	WIPI1/2
ATG8b	FBgn0034366	LC3ap
bab1	FBgn0004870	-
Caf1	FBgn0263979	ENSG00000162521
Caf1	FBgn0263979	ENSG00000162521
Cdk9	FBgn0019949	ENSG00000136807 CDK12 CDK13
CG11440	FBgn0037163	PPAP2C PPAP2B PPAP2A
CG11489	FBgn0025702	ENSG00000135250 SRPK1 SRPK3
CG12746	FBgn0037341	ENSG00000147535 ENSG00000203805
CG17090	FBgn0035142	HIPK2 ENSG00000163349 ENSG00000110422
CG6686	FBgn0032388	SART1
CycT	FBgn0025455	CCNT1 ENSG00000082258
dalao	FBgn0030093	SMARCE1
Df31	FBgn0022893	-
E(bx)	FBgn0000541	ENSG00000171634
E(bx)	FBgn0000541	ENSG00000171634
ear	FBgn0026441	ZNF703 YLPM1 FOXK1
enok	FBgn0034975	ENSG00000172977 KAT6A KAT7 ENSG00000156650
ial	FBgn0024227	ENSG00000105146 aurkb ENSG00000087586
ire-1	FBgn0261984	ERN1
JIL-1	FBgn0020412	RPS6KA5 RPS6KA4
Jra	FBgn0001291	JUNB JUND JUN
jumu	FBgn0015396	FOXN1
kto	FBgn0001324	ENSG00000184634 ENSG00000144893
Lmpt	FBgn0261565	-
MED1	FBgn0037109	ENSG00000125686
MED4	FBgn0035754	MED4
Mes-4	FBgn0039559	-
mip120	FBgn0033846	MTL5 LIN54
mip130	FBgn0023509	-
MRG15	FBgn0027378	MORF4L1 MORF4L2
mRNA-capping-enzyme		RNGTT
Myt1	FBgn0040298	PKMYT1
nej	FBgn0261617	CREBBP EP300
p38b	FBgn0024846	MAPK9 MAPK12 MAPK11 MAPK13 ENSG00000112062 ENSG00000109339
Pc	FBgn0003042	-
Pkg21D	FBgn0000442	PRKG1 PRKG2
polo	FBgn0003124	PLK2 PLK3 PLK1
Pten	FBgn0026379	TPTE ENSG00000132958 PTEN
sgg	FBgn0003371	GSK3A GSK3B
skd	FBgn0003415	-
synj	FBgn0034691	SYNJ2 SYNJ1
trbl	FBgn0028978	-
ush	FBgn0003963	-
wdb	FBgn0027492	PPP2R5D PPP2R5C PPP2R5B PPP2R5A PPP2R5E
			"suppressors" of UPR signaling
			"enhancers" of UPR signaling
