# Supplementary material for: Signaling Networks Converge on TORC1-SREBP Activity to Promote Endoplasmic Reticulum Homeostasis
Source: PLoS One. 2014 Jul 9;9(7):e101164. doi: 10.1371/journal.pone.0101164 (PMC4090155; doi:10.1371/journal.pone.0101164)
Supplement: Table S2 — Data from SREBP-sensitized double RNAi screens for XBP1-EGFP regulators. Z-scores from averaged normalized values and a curated full list of hits are included. (XLSX) [file pone.0101164.s007.xlsx]

## Sheet: 4assays-corrected.txt
Gene ID	Amplicon ID	Zscore-xbp1	Zscore-lipid droplets pattern
Akt	DRSC36667	2.49	5.89
Atf6	DRSC04743	-1.01	0.1
ATG1	DRSC09810	-1.55	-1.56
ATG12	DRSC09803	1.75	2.97
ATG13	DRSC16228	-0.24	0.5
ATG18	DRSC10943	-1.45	0.72
ATG2	DRSC08273	0.36	0.18
ATG4	DRSC28580	-0.14	-1.33
ATG5	DRSC18112	-1.31	0.54
ATG6	DRSC24442	-0.99	-1.25
ATG7	DRSC38117	-1.53	4.81
ATG8a	DRSC24298	-1.12	2.5
ATG8b	DRSC24428	-0.92	1.9
ATG9	DRSC38119	-0.8	0.71
BiP	DRSC33319	13.11	7.13
Brummer	DRSC10502	4.31	6.75
Cct1	DRSC08157	1.4	2.44
Cdk4	DRSC27263	4.34	7.06
Cdk8	DRSC11113	-1.22	2.5
CG10426	DRSC36690	1.07	0.88
CG11425	DRSC28400	1.66	-1.9
CG12746	DRSC36705	-2.31	-0.47
CG14030	DRSC23158	0.75	-0.88
CG14211	DRSC36617	-0.12	0.52
CG15011	DRSC08464	0.86	-1.23
CG17090	DRSC36675	-1.92	-0.95
CG17124	DRSC29139	1.43	-0.39
CG18854, IP3K1	DRSC23313	2.31	-1.65
CG31716	DRSC02831	1.95	-4.11
CG6686	DRSC37491	-3.07	6.13
Cls	DRSC28289	-1.85	-2.65
crc	DRSC03513	3.83	1.41
CTCF	DRSC28022	1.12	-1.09
CycB	DRSC36783	-0.23	-1.46
CycD	DRSC25031	6.78	4.9
CycG	DRSC23345	0.89	-1.02
dorsal	DRSC03521	1.41	-0.22
Dp	DRSC07402	24.53	7.83
dSCAP	DRSC04907	1.42	2.65
EcR	DRSC04906	-2.12	1.19
Egfr	DRSC36621	1.57	3.02
enok	DRSC37543	-1.8	3.87
ERp44	DRSC20215	1.25	2.21
Fmr1	DRSC16674	-0.56	-1.61
foxo	DRSC37549	0.85	-0.51
Grp93	DRSC15827	1.5	-0.96
HLH106	DRSC37563	21.26	15.45
HmgD	DRSC26171	-0.61	4.36
ial	DRSC23324	-2.26	-6.82
InR	DRSC36686	1.48	-1.25
IP3K2	DRSC19747	1.44	-6.8
IP3KI	DRSC02734	2.32	-6.8
ire1	DRSC36730	-8.23	-1.13
Jun	DRSC07447	-3.57	-4.05
MED20	DRSC03463	3.23	13.37
mei-41	DRSC36631	-1.18	-3.5
Myt-1	DRSC30071	-2.89	-4.31
Nipped-A	DRSC04883	2.66	1.31
p38b	DRSC36755	-1.72	0.66
p53	DRSC17024	-1.34	-1.16
Pek	DRSC12361	-0.95	0.94
Pi3K21B	DRSC00771	3.91	1.03
Pi3K92E	DRSC16788	1.3	0.02
Pi4KIIalpha	DRSC29095	0.43	-1.62
Pk61C	DRSC08682	2.3	-3.52
Pkg21D	DRSC29092	-1.48	1.1
Pld	DRSC24641	-0.05	-1.54
polo	DRSC11384	-1.49	-5.81
Pp1-13C	DRSC20269	3.22	1.13
Pp2A-B	DRSC16344	-0.89	-3.68
Pten	DRSC29950	-0.89	-1.68
Rac1	DRSC08688	0.93	2.26
Rac2	DRSC11262	-0.36	6
raptor	DRSC18359	14.33	17
regucalcin	DRSC20366	-1.25	-1.54
rictor	DRSC20071	-1.87	-4.38
Rtnl1	DRSC02684	-0.55	1.34
S6k	DRSC36709	1.01	3.07
S6kII	DRSC20645	0.55	-1.99
sgg	DRSC17722	-2.2	-1
SK1	DRSC19774	2.5	1.78
Sk2	DRSC36776	3.12	1.78
sktl	DRSC36718	1.99	-5.34
Smg1	DRSC18366	2.02	-4.6
Sos	DRSC03439	2.76	8.32
Spt-I	DRSC06860	-1.49	1.3
sug	DRSC29599	-1.32	2.16
synj	DRSC36665	-2.01	-1.97
Tor	DRSC36734	5.23	8.46
trbl	DRSC36590	-1.73	-2.81
Trio	DRSC07928	1.95	5.37
TSC2	DRSC11351	-2.87	-3.67
ush	DRSC00843	-4.34	-2.99
wdb	DRSC14163	-2.78	-3.1
xbp1	DRSC21624	-6.03	-3.22
Yop	DRSC27133	-0.03	4.47
