# Supplementary material for: Signaling Networks Converge on TORC1-SREBP Activity to Promote Endoplasmic Reticulum Homeostasis
Source: PLoS One. 2014 Jul 9;9(7):e101164. doi: 10.1371/journal.pone.0101164 (PMC4090155; doi:10.1371/journal.pone.0101164)
Supplement: Table S3 — “XH” manually curated dsRNA set used for focused screenings included selected hits and a number of additional amplicons targeting interested genes not present in the primary screens. Z-scores from averaged normalized values are provided for each assay, performed in duplicate. (XLSX) [file pone.0101164.s008.xlsx]

## Sheet: dataset
set	Amplicon ID	Gene	Z-score
TXN504	DRSC22996	A3-3	0.349312
KP401	DRSC05028	14-3-3zeta	0.269025
KP404	DRSC27525	14-3-3zeta	-0.249709
TXN501	DRSC05028	14-3-3zeta	2.06816
TXN506	DRSC27525	14-3-3zeta	0.932254
ER/R	DRSC01864	aay	-0.565671
ER/R	DRSC36744	aay	-0.353904
KP401	DRSC11320	aay	1.24151
KP406	DRSC36744	aay	-0.488401
TXN505	DRSC23179	ab	-0.275129
TXN507	DRSC37378	ab	2.32843
TXN501	DRSC06532	abba	-0.966846
TXN504	DRSC05768	abba	-0.136584
TXN506	DRSC27711	abba	-1.04766
TXN504	DRSC23013	abd-A	-0.586157
TXN507	DRSC29065	abd-A	0.470589
TXN507	DRSC37379	abd-A	2.07068
TXN503	DRSC14098	Abd-B	0.580882
TXN503	DRSC14337	Abd-B	-1.74501
TXN506	DRSC28796	Abd-B	0.389908
KP402	DRSC09661	Abl	0.0642256
KP403	DRSC23306	Abl	-1.21273
KP406	DRSC36588	Abl	-0.891698
KP406	DRSC36589	Abl	-1.36622
TXN502	DRSC02926	abo	0.664215
TXN507	DRSC37380	abo	1.31748
TXN505	DRSC25102	ac	-1.36442
TXN502	DRSC07276	achi	1.21748
TXN505	DRSC24803	achi	-0.496395
TXN501	DRSC07277	achi, vis	0.500339
TXN507	DRSC07277	achi, vis	-0.16278
KP402	DRSC20304	acj6	-2.1856
KP404	DRSC29003	acj6	1.24203
KP406	DRSC36590	acj6	-0.54381
TXN502	DRSC20304	acj6	2.86711
TXN507	DRSC29003	acj6	1.18719
KP402	DRSC08135	Ack	0.292077
KP404	DRSC28013	Ack	-0.0552043
KP403	DRSC14103	Acph-1	-1.45213
KP406	DRSC36591	Acph-1	0.0236483
TXN503	DRSC16531	Ada2b	0.0935566
TXN507	DRSC37381	Ada2b	-0.525292
TXN501	DRSC04963	Adf1	-0.70787
TXN504	DRSC04941	Adf1	-0.187345
KP402	DRSC10248	Adk1	-0.993354
KP405	DRSC29837	Adk1	0.40441
KP408	DRSC29837	Adk1	-1.00282
KP402	DRSC04043	Adk2	0.759704
KP406	DRSC36736	Adk2	-0.151564
KP402	DRSC16075	Adk3	-1.91383
KP404	DRSC27968	Adk3	-1.31647
KP401	DRSC05917	Ady43A	1.75507
KP404	DRSC28006	Ady43A	-0.795614
TXN503	DRSC11605	Aef1	0.901405
TXN507	DRSC37382	Aef1	0.785481
ER/R	DRSC01864	Akap200	1.01863
ER/R	DRSC36791	Akap200	1.61459
KP401	DRSC01864	Akap200	0.509143
KP406	DRSC36791	Akap200	-1.18175
KP401	DRSC14108	Akt1	3.39729
KP406	DRSC36666	Akt1	-0.771312
KP406	DRSC36667	Akt1	-0.783356
TXN502	DRSC00799	al	-1.46484
TXN507	DRSC37383	al	0.67321
ER/R	DRSC14109	Ald	1.89198
KP401	DRSC16273	ald	-1.20561
KP407	DRSC36724	ald	-0.526787
KP407	DRSC36725	ald	1.22184
TXN503	DRSC12488	Alh	-0.914068
TXN507	DRSC28926	Alh	1.17266
KP402	DRSC05918	Alk	-1.26834
KP404	DRSC23342	Alk	-0.512182
KP407	DRSC36762	Alk	-0.811188
KP407	DRSC36763	Alk	-1.26957
TXN505	DRSC21784	aly	-0.579079
TXN502	DRSC03484	amos	-0.108917
TXN505	DRSC24784	amos	0.365951
TXN504	DRSC23104	Antp	1.59777
TXN506	DRSC26749	Antp	-0.0137658
TXN504	DRSC22999	aop	0.28422
TXN505	DRSC25805	aop	0.815909
TXN501	DRSC04917	ap	-0.353984
TXN507	DRSC37384	ap	0.795996
TXN503	DRSC11601	AP-2	3.48423
TXN507	DRSC37385	AP-2	2.35045
KP403	DRSC14116	Aph-4	-0.302552
KP406	DRSC36712	Aph-4	-1.08041
KP402	DRSC07639	aPKC	1.79967
KP405	DRSC29936	aPKC	-0.561195
KP408	DRSC29936	aPKC	-0.720273
TXN505	DRSC23278	apt	0.403627
TXN506	DRSC26181	apt	-0.54682
TXN505	DRSC25783	ara	1.16411
TXN503	DRSC14340	Arc42	-1.0488
TXN503	DRSC15627	Arc42	0.316303
KP401	DRSC10460	Argk	-0.101616
KP402	DRSC09668	Argk	-0.871245
KP403	DRSC08959	Argk	-1.35236
KP403	DRSC22665	Argk	-0.856903
KP404	DRSC21558	Argk	0.406454
KP405	DRSC08959	Argk	-1.12946
KP408	DRSC08959	Argk	-1.67692
KP403	DRSC17136	Asator	0.621663
KP407	DRSC36753	Asator	-1.30669
KP407	DRSC36754	Asator	-1.30264
ER/R	DRSC18739	ase	-1.51072
ER/R	DRSC37386	ase	0.471746
TXN504	DRSC18739	ase	1.16746
TXN507	DRSC37386	ase	0.875861
TXN501	DRSC11325	ash1	1.54234
TXN507	DRSC37387	ash1	1.70296
KP401	DRSC16903	asp	-2.42589
KP406	DRSC36592	asp	-0.450707
KP406	DRSC36593	asp	-0.699614
TXN505	DRSC23408	Asx	1.74766
TXN507	DRSC37388	Asx	2.52002
TXN509	DRSC29661	ATbp	0.699317
TXN509	DRSC37992	ATbp	-0.729923
TXN501	DRSC04130	Atf-2	0.692585
TXN504	DRSC04413	Atf-2	-1.46807
ER/R	DRSC04743	ATF6	1.93592
ER/R	DRSC18739	ATF6	1.5097
ER/R	DRSC28936	ATF6	-0.496828
ER/R	DRSC37386	ATF6	-0.0200113
TXN502	DRSC04889	Atf6	1.61072
TXN504	DRSC04743	Atf6	0.447521
TXN507	DRSC28936	Atf6	1.88924
KP401	DRSC09809	Atg1	3.57348
KP401	DRSC09809	Atg1	2.97948
KP402	DRSC09810	Atg1	-0.0235239
KP402	DRSC09810	Atg1	-0.0864042
ER/R	DRSC09809	ATG1	-0.502429
ER/R	DRSC09810	ATG1	-0.208208
ER/R	DRSC37017	ATG1	0.0604188
ER/R	DRSC09803	ATG12	0.98408
ER/R	DRSC16228	ATG13	-0.0851121
ER/R	DRSC10943	ATG18	1.77209
ER/R	DRSC08273	ATG2	1.02309
ER/R	DRSC00656	ATG4	1.4803
ER/R	DRSC28580	ATG4	0.338016
ER/R	DRSC18112	ATG5	-0.160603
ER/R	DRSC38116	ATG5	0.367448
ER/R	DRSC15798	ATG6	0.787637
ER/R	DRSC24442	ATG6	0.0719166
ER/R	DRSC05741	ATG7	1.67914
ER/R	DRSC06937	ATG7	1.12743
ER/R	DRSC38117	ATG7	1.5595
ER/R	DRSC18024	ATG8a	1.37098
ER/R	DRSC24298	ATG8a	2.50609
ER/R	DRSC14501	ATG8b	-0.506373
ER/R	DRSC24428	ATG8b	1.26033
ER/R	DRSC06848	ATG9	1.22223
ER/R	DRSC38118	ATG9	-0.0991397
ER/R	DRSC38119	ATG9	-0.815921
TXN503	DRSC16904	ato	-0.542557
TXN507	DRSC37389	ato	0.436414
KP402	DRSC16905	aur	1.44155
KP404	DRSC27171	aur	1.14146
KP401	DRSC12161	auxillin	2.58763
KP404	DRSC28178	auxillin	0.0819598
KP403	DRSC16906	awd	-1.61956
KP406	DRSC36594	awd	1.18748
TXN503	DRSC08140	Awh	2.94553
TXN507	DRSC37390	Awh	0.10265
TXN501	DRSC07580	az2	0.257186
TXN507	DRSC37391	az2	1.27824
TXN505	DRSC21922	B-H1	-0.447752
TXN506	DRSC27190	B-H1	-0.674316
TXN504	DRSC23012	B-H2	-1.84532
TXN505	DRSC25817	B-H2	0.598433
TXN503	DRSC08709	bab1	-0.460224
TXN505	DRSC21882	bab1	2.42928
TXN505	DRSC25457	bab1	-0.44004
TXN503	DRSC08150	bab2	1.41485
TXN506	DRSC26326	bab2	-0.102616
KP402	DRSC07581	babo	1.55453
KP406	DRSC36676	babo	-1.32081
KP406	DRSC36677	babo	-0.707045
KP403	DRSC14145	ball	2.10939
KP404	DRSC26607	ball	2.7553
ER/R	DRSC14242	BAP	0.329601
TXN504	DRSC16908	bap	0.383704
TXN506	DRSC27201	bap	0.346661
TXN501	DRSC04964	Bap170	-0.472249
TXN505	DRSC21826	Bap170	0.00947853
TXN506	DRSC27559	Bap170	0.40145
TXN502	DRSC19337	Bap60	0.129545
TXN502	DRSC20575	bbx, waw	0.417381
TXN504	DRSC20589	bbx, waw	-1.90264
TXN507	DRSC24894	bbx, waw	0.156192
TXN501	DRSC12624	bcd	1.53027
TXN505	DRSC25303	bcd	1.51452
TXN501	DRSC05927	BEAF-32	-0.178054
TXN504	DRSC05503	BEAF-32, CG42254	-0.63572
TXN509	DRSC08148	Bgb	1.76631
TXN509	DRSC25855	Bgb	0.407859
TXN504	DRSC18742	bi	2.5307
ER/R	DRSC10782	BI-1	-0.750795
ER/R	DRSC39448	BI-1	-1.03734
TXN501	DRSC07584	bic	-0.572288
TXN505	DRSC25656	bic	-0.982768
TXN502	DRSC15481	bigmax	-0.665562
TXN506	DRSC27542	bigmax	-1.13231
TXN503	DRSC10332	bin	1.39273
TXN507	DRSC29845	bin	-1.46127
ER/R	DRSC25105	Hsc70-3/Gp78	4.03216
ER/R	DRSC33319	Hsc70-3/Gp78	5.81624
TXN502	DRSC17170	bip2	-0.776921
TXN507	DRSC29650	bip2	-0.925436
TXN502	DRSC02757	Bka	-0.606415
TXN504	DRSC22734	bl	-0.50836
TXN505	DRSC24070	bl	1.84882
TXN505	DRSC24305	Blimp-1	-1.16449
TXN507	DRSC37392	Blimp-1	-1.04137
TXN501	DRSC00805	bowl	0.452675
TXN506	DRSC28379	bowl	-0.178285
TXN504	DRSC17691	br	-1.97697
TXN504	DRSC17789	br	-0.642265
TXN505	DRSC25765	br	-0.0466544
TXN501	DRSC03497	brat	-0.304134
TXN507	DRSC37393	brat	0.223959
TXN503	DRSC14166	Brf	0.527625
TXN503	DRSC14167	Brf	0.198902
TXN504	DRSC23036	brk	-2.05494
TXN506	DRSC27320	brk	-1.09807
TXN503	DRSC11330	brm	-1.26403
TXN506	DRSC26226	brm	0.745761
TXN503	DRSC08149	Bro	-2.30044
TXN504	DRSC23068	bs	-2.1773
TXN506	DRSC25943	bs	-3.06257
TXN504	DRSC03498	bsh	0.127983
TXN505	DRSC25413	bsh	0.00552269
KP401	DRSC03499	bsk	-0.877505
KP406	DRSC36595	bsk	-1.52149
KP406	DRSC36596	bsk	-1.07586
KP401	DRSC17129	bt	0.751391
KP401	DRSC17171	bt	-0.404677
KP403	DRSC17129	bt	-0.232095
KP403	DRSC17171	bt	-0.97415
KP406	DRSC36656	bt	-1.32143
KP406	DRSC36657	bt	0.610747
TXN505	DRSC25020	BtbVII	0.326972
TXN507	DRSC37394	BtbVII	1.14077
TXN504	DRSC18747	btd	-0.621507
TXN507	DRSC29060	btd	0.925889
TXN504	DRSC17742	Bteb2	1.15164
TXN507	DRSC37395	Bteb2	-0.0495278
KP401	DRSC02666	Btk29A	-1.05018
KP402	DRSC02008	Btk29A	-0.478549
KP404	DRSC22427	Btk29A	5.35132
KP407	DRSC36796	Btk29A	-1.30743
KP402	DRSC11331	btl	-0.256204
KP406	DRSC36653	btl	-0.479736
KP406	DRSC36654	btl	-1.15147
TXN506	DRSC26486	btn	0.679738
TXN504	DRSC13569	btn, CG31158	-0.292229
KP402	DRSC04838	Bub1	0.323012
KP406	DRSC36758	Bub1	-1.25762
KP406	DRSC36759	Bub1	-2.88024
TXN504	DRSC23048	Bx	-1.33535
TXN506	DRSC28506	Bx	0.289217
ER/R	DRSC17743	Bx42	-0.849376
TXN503	DRSC11332	byn	1.93889
TXN507	DRSC29142	byn	2.03032
TXN509	DRSC13495	C15	-0.0196456
TXN509	DRSC37993	C15	2.10776
ER/R	DRSC04600	Ca-P60A	0.839275
TXN501	DRSC03501	cact	1.3663
TXN506	DRSC28422	cact	0.142913
TXN505	DRSC23193	cad	-0.525565
TXN506	DRSC27989	cad	-1.518
KP403	DRSC14220	Cad96Ca	0.352059
KP403	DRSC16693	Cad96Ca	0.161588
KP406	DRSC36738	Cad96Ca	-1.44822
KP406	DRSC36739	Cad96Ca	-0.279103
ER/R	DRSC16596	Caf1	-0.766136
TXN501	DRSC16596	Caf1	-1.6848
TXN507	DRSC37396	Caf1	-0.158284
KP403	DRSC14588	Caki	0.0582892
KP403	DRSC16597	Caki	-0.919426
KP403	DRSC16598	Caki	-1.98033
KP404	DRSC21917	Caki	1.56885
KP405	DRSC14588	Caki	4.57429
KP405	DRSC29057	Caki	2.30914
KP408	DRSC14588	Caki	1.82094
KP408	DRSC29057	Caki	0.662318
KP401	DRSC17162	CaMKI	1.09526
KP403	DRSC17162	CaMKI	-2.31341
KP406	DRSC36713	CaMKI	-2.46692
KP406	DRSC36714	CaMKI	-1.6667
KP401	DRSC17214	CaMKII	0.45446
KP403	DRSC17214	CaMKII	0.0239668
KP406	DRSC36643	CaMKII	-1.81777
KP406	DRSC36644	CaMKII	-2.47969
TXN501	DRSC07272	Camta	3.38992
TXN507	DRSC37397	Camta	0.192623
TXN504	DRSC10664	can	-0.954009
TXN507	DRSC37398	can	-0.418051
KP403	DRSC23296	CanA-14F	-1.33526
KP407	DRSC36612	CanA-14F, Pp2B-14D	-0.957914
KP403	DRSC16600	CanA1	-1.54245
KP404	DRSC25868	CanA1	2.20219
KP403	DRSC18449	CanB	-1.842
KP405	DRSC29220	CanB	-0.574144
KP408	DRSC29220	CanB	-1.50619
KP403	DRSC07355	CanB2	-1.31146
KP404	DRSC27440	CanB2	2.50984
TXN503	DRSC12373	cas	-0.718486
TXN505	DRSC24858	cas	-0.754302
TXN502	DRSC07589	cato	0.527842
TXN505	DRSC23280	caz	0.424118
TXN507	DRSC29957	caz	-1.15748
TXN501	DRSC00655	cbt	-0.46949
TXN506	DRSC26117	cbt	-1.00286
KP401	DRSC03504	cdc2	0.728605
KP401	DRSC16921	cdc2c	1.61416
KP406	DRSC36625	cdc2c	1.17821
KP402	DRSC07590	cdc2rk	-0.234604
KP405	DRSC29758	cdc2rk	0.336751
KP408	DRSC29758	cdc2rk	-0.740046
KP402	DRSC08648	Cdc37	-1.92972
KP404	DRSC27723	Cdc37	-0.959233
GEFGAP	DRSC20228	Cdc42	-0.678734
GEFGAP	DRSC12028	Cdep	-0.630451
GEFGAP	DRSC03289	CdGAPr	-0.278553
KP401	DRSC16922	cdi	0.469349
KP404	DRSC28376	cdi	1.61376
KP406	DRSC36651	cdi	-0.729361
KP406	DRSC36652	cdi	-0.450213
KP401	DRSC07358	Cdk4	-1.29936
KP404	DRSC27263	Cdk4	-1.27162
KP401	DRSC07359	Cdk5	0.436418
KP406	DRSC36682	Cdk5	-0.976438
KP402	DRSC03290	Cdk5alpha	0.00679162
KP403	DRSC23301	Cdk5alpha	1.17281
KP403	DRSC18451	Cdk7	0.0119753
KP404	DRSC23327	Cdk7	-1.03341
TXN504	DRSC18451	Cdk7	0.852991
TXN505	DRSC23327	Cdk7	-0.330647
KP401	DRSC11113	Cdk8	0.320718
KP404	DRSC28684	Cdk8	-1.64007
TXN501	DRSC11113	Cdk8	-0.638314
TXN506	DRSC28684	Cdk8	-1.59995
KP402	DRSC04601	Cdk9	3.00647
TXN502	DRSC04601	Cdk9	-0.0537645
TXN509	DRSC14371	Cenp-C	2.20325
TXN509	DRSC29707	Cenp-C	0.192869
TXN506	DRSC28177	Cf2	-0.576579
TXN505	DRSC23142	cg	0.74408
TXN506	DRSC28656	cg	-0.93744
KP402	DRSC09695	CG10089	-1.44249
KP404	DRSC25988	CG10089	3.43786
TXN503	DRSC09706	CG10147	-0.999272
TXN507	DRSC29564	CG10147	0.0606952
KP402	DRSC14194	CG10148	0.672604
KP407	DRSC36714	CG10148	-0.552619
KP403	DRSC14201	CG10177	-0.221594
KP404	DRSC27888	CG10177	1.67439
GEFGAP	DRSC02023	CG10188	1.44953
TXN501	DRSC05980	CG10209	-0.237642
TXN507	DRSC37399	CG10209	0.356628
TXN503	DRSC14218	CG10232	0.344156
TXN503	DRSC12496	CG1024	1.79313
TXN507	DRSC37400	CG1024	0.506287
KP403	DRSC18655	CG10260	-0.50339
KP407	DRSC36759	CG10260	0.606378
KP407	DRSC36760	CG10260	-1.75397
TXN501	DRSC12514	CG10267	0.120362
TXN507	DRSC37401	CG10267	0.545548
KP402	DRSC02032	CG10268	0.35752
KP407	DRSC36641	CG10268	-0.588809
TXN501	DRSC09716	CG10274	1.02255
TXN505	DRSC24792	CG10274	-0.891391
TXN504	DRSC04061	CG10321	0.216092
TXN506	DRSC28284	CG10321	-1.4162
TXN505	DRSC23233	CG10348	1.29268
TXN507	DRSC30046	CG10348	-0.923643
TXN501	DRSC02046	CG10366	1.04391
TXN506	DRSC26463	CG10366	-0.401154
KP401	DRSC02049	CG10376	-0.171234
KP404	DRSC26744	CG10376	0.111843
KP407	DRSC36636	CG10376	-0.274191
KP401	DRSC04846	CG10417	-0.859954
KP404	DRSC27173	CG10417	-0.885754
KP407	DRSC36647	CG10417	-0.469487
KP402	DRSC09723	CG10426	0.659904
KP407	DRSC36689	CG10426	-1.28237
KP407	DRSC36690	CG10426	-0.821385
TXN502	DRSC02055	CG10431	0.607043
TXN507	DRSC37402	CG10431	1.1534
TXN502	DRSC02057	CG10447	0.711262
KP402	DRSC05991	CG10459	-0.990209
KP404	DRSC22092	CG10459	1.27186
TXN501	DRSC02058	CG10462	-1.65776
TXN507	DRSC37403	CG10462	0.85651
KP402	DRSC02065	CG10493	-0.557858
KP403	DRSC22808	CG10493	-2.94019
KP407	DRSC36637	CG10493	-0.377601
TXN504	DRSC23102	CG10543	0.272009
TXN507	DRSC37404	CG10543	0.0412117
TXN501	DRSC09745	CG10576	0.185329
TXN507	DRSC37406	CG10576	0.557672
TXN501	DRSC02081	CG10631	1.35748
TXN507	DRSC37407	CG10631	0.767077
TXN503	DRSC09767	CG10654	-1.00249
TXN507	DRSC37408	CG10654	2.39572
TXN503	DRSC14261	CG10669	0.305015
TXN507	DRSC37409	CG10669	0.170795
KP402	DRSC09774	CG10673	1.76066
KP401	DRSC02097	CG10702	-1.78127
KP407	DRSC36638	CG10702	-1.4791
KP407	DRSC36639	CG10702	-0.602264
KP402	DRSC09795	CG10743	-0.045362
KP404	DRSC23339	CG10743	-0.594239
KP404	DRSC28695	CG10743	1.08392
ER/R	DRSC09801	CG10754	0.632743
KP401	DRSC14269	CG10827	0.768497
KP405	DRSC29539	CG10827	0.351907
KP408	DRSC29539	CG10827	-1.80784
ER/R	DRSC14275	CG10881	0.0272863
KP402	DRSC06016	CG10933	1.04781
KP407	DRSC36658	CG10933	-0.894204
TXN507	DRSC02112	CG10949	-0.860523
TXN509	DRSC27310	CG10949	-1.88064
TXN502	DRSC17769	CG10959	-0.88684
TXN507	DRSC29120	CG10959	0.328274
TXN503	DRSC12153	CG10979	-1.63076
TXN507	DRSC37410	CG10979	0.570289
KP401	DRSC12157	CG10999	0.342036
KP404	DRSC26577	CG10999	-0.397787
TXN502	DRSC19367	CG11063	-1.5563
TXN506	DRSC26225	CG11063	-0.127123
TXN504	DRSC19370	CG11071	1.6837
TXN507	DRSC29723	CG11071	0.0830147
TXN505	DRSC25203	CG11085	0.411417
TXN506	DRSC26567	CG11152	-0.921903
KP402	DRSC02134	CG11221	7.36913
KP404	DRSC28743	CG11221	-0.661729
TXN505	DRSC21901	CG11247	0.109106
TXN506	DRSC26558	CG11247	-0.955671
TXN507	DRSC11643	CG11247	0.286813
KP401	DRSC09827	CG11255	1.25862
KP407	DRSC36691	CG11255	-1.795
TXN505	DRSC25060	CG11294	0.573772
TXN504	DRSC18625	CG11398	-0.00833138
TXN507	DRSC37411	CG11398	0.39159
TXN501	DRSC04110	CG11414	-2.25475
TXN507	DRSC37412	CG11414	-0.13681
KP402	DRSC11657	CG11425	-0.627922
KP404	DRSC28400	CG11425	-0.21486
KP402	DRSC11658	CG11426	-0.0892549
KP404	DRSC27815	CG11426	1.62191
KP402	DRSC11659	CG11437	1.12892
KP402	DRSC11660	CG11438	-0.239836
KP407	DRSC36699	CG11438	-0.196155
KP401	DRSC11661	CG11440	-2.22009
KP404	DRSC23330	CG11440	1.87028
KP405	DRSC29129	CG11440	-0.395352
KP408	DRSC29129	CG11440	-0.681696
TXN501	DRSC11665	CG11456	0.550874
TXN507	DRSC37413	CG11456	0.052269
KP401	DRSC11668	CG11489	-1.4014
KP402	DRSC11856	CG11489	7.20783
KP405	DRSC29962	CG11489	3.34783
KP406	DRSC36763	CG11489	1.41753
KP408	DRSC29962	CG11489	-0.975184
TXN509	DRSC14318	CG11504	-0.515437
TXN509	DRSC09843	CG11560	2.19075
TXN509	DRSC27017	CG11560	0.716206
KP401	DRSC09847	CG11597	3.60507
KP407	DRSC36688	CG11597, CG5946	1.63249
TXN505	DRSC21786	CG11617	0.152246
TXN506	DRSC28154	CG11617	-1.63162
KP401	DRSC09853	CG11660	-2.35772
KP407	DRSC36686	CG11660	-0.909051
KP407	DRSC36687	CG11660	0.466683
TXN504	DRSC19416	CG11695	0.308161
TXN507	DRSC29760	CG11695	-0.934944
TXN502	DRSC19417	CG11696	0.276857
TXN507	DRSC37414	CG11696	1.01496
TXN501	DRSC00324	CG11723	0.685468
TXN505	DRSC24890	CG11723	1.11912
TXN503	DRSC14376	CG11762	-0.638044
TXN507	DRSC37415	CG11762	0.842549
KP402	DRSC09862	CG11811	-1.68064
KP407	DRSC36683	CG11811	-0.0469086
TXN502	DRSC00326	CG11835	-2.13117
TXN507	DRSC37416	CG11835	1.00814
KP403	DRSC14413	CG11859	0.76993
KP407	DRSC36745	CG11859	-0.471759
KP407	DRSC36746	CG11859	-1.95018
KP401	DRSC14415	CG11870	-1.79454
KP402	DRSC14414	CG11870	-1.07277
KP407	DRSC36710	CG11870	-1.12922
TXN502	DRSC14420	CG11876	2.75456
TXN507	DRSC28805	CG11902	2.05149
TXN503	DRSC06096	CG11906	0.600342
TXN507	DRSC37417	CG11906	0.692295
TXN503	DRSC14448	CG11966	-1.57752
TXN507	DRSC29647	CG11966	-1.46137
TXN503	DRSC08233	CG12029	-0.585889
TXN505	DRSC23137	CG12054	0.501687
TXN507	DRSC37418	CG12054	0.123046
KP403	DRSC14470	CG12069	3.92359
KP404	DRSC26204	CG12069	0.66098
TXN504	DRSC22972	CG12071	-0.886428
KP402	DRSC12192	CG12147	2.73123
KP405	DRSC30029	CG12147	-0.670999
KP408	DRSC30029	CG12147	-1.07752
KP401	DRSC17825	CG12151	-0.915955
KP403	DRSC17825	CG12151	-1.32799
KP404	DRSC26725	CG12151	0.134639
TXN509	DRSC23294	CG12155	1.1591
KP402	DRSC08260	CG12169	-1.45721
KP404	DRSC27792	CG12169	-0.329835
TXN506	DRSC24690	CG12219	1.16347
TXN507	DRSC37419	CG12219	-0.966018
TXN504	DRSC17831	CG12236	1.39881
TXN505	DRSC25773	CG12236	1.98838
KP401	DRSC04121	CG12252	-0.422435
KP404	DRSC26715	CG12252	-0.679282
KP407	DRSC36671	CG12252	-1.16588
KP401	DRSC12534	CG1227	1.91769
KP404	DRSC25952	CG1227	1.8184
TXN506	DRSC23611	CG12299	-0.322938
TXN507	DRSC37421	CG12299	-0.0878197
TXN501	DRSC08269	CG1233	-1.13
TXN506	DRSC26110	CG1233	0.797828
TXN501	DRSC06147	CG12391	0.795159
TXN507	DRSC37422	CG12391	0.262313
TXN503	DRSC08286	CG12605	-1.55133
TXN509	DRSC27326	CG12659	-1.15133
TXN509	DRSC37995	CG12659	2.76721
KP401	DRSC08290	CG1271	0.151887
KP407	DRSC36678	CG1271	-1.67331
KP407	DRSC36679	CG1271	0.147928
TXN501	DRSC06164	CG12744	-0.337145
TXN507	DRSC37423	CG12744	0.448403
KP401	DRSC12218	CG12746	-3.06226
KP407	DRSC36705	CG12746	-1.83839
TXN509	DRSC23215	CG12768	-0.218451
TXN509	DRSC28549	CG12768	-2.20592
TXN506	DRSC25056	CG12769	2.45049
TXN507	DRSC37424	CG12769	0.478212
TXN506	DRSC23818	CG12856, kn	0.00939821
TXN501	DRSC06253	CG12942	-0.128254
TXN506	DRSC25987	CG12942	-0.666141
TXN502	DRSC02219	CG13123	0.0627797
TXN507	DRSC37425	CG13123	-0.059983
KP402	DRSC02221	CG13125	-1.24105
KP407	DRSC36632	CG13125	-1.29844
TXN501	DRSC06310	CG13185	-0.214262
TXN507	DRSC37427	CG13185	1.65096
TXN502	DRSC06328	CG13204	0.988375
TXN506	DRSC27988	CG13204	0.271176
TXN504	DRSC09961	CG13287	1.33802
TXN506	DRSC26934	CG13287	-1.53595
TXN503	DRSC09970	CG13296	2.39397
TXN507	DRSC37428	CG13296	0.957544
TXN503	DRSC06387	CG13424	0.616662
TXN506	DRSC27541	CG13424	0.457059
KP401	DRSC04837	CG1344	-0.0882764
KP406	DRSC36787	CG1344	-0.392043
KP406	DRSC36788	CG1344	-0.614562
TXN503	DRSC14620	CG13617	1.74953
TXN507	DRSC37429	CG13617	0.109528
TXN509	DRSC14626	CG13624	-0.47892
TXN509	DRSC24359	CG13624	0.986441
TXN501	DRSC02278	CG13773	0.881648
TXN506	DRSC28047	CG13773	-0.687758
TXN502	DRSC02279	CG13775	-1.46442
TXN507	DRSC29121	CG13775	-0.87309
TXN506	DRSC24686	CG13796	1.11268
TXN509	DRSC29274	CG13894	-0.302683
TXN503	DRSC08367	CG13897	-1.03713
TXN507	DRSC29262	CG13897	-0.440731
KP403	DRSC23158	CG14030	5.09233
KP404	DRSC27436	CG14030	-0.271255
KP407	DRSC36628	CG14030	-0.357717
KP407	DRSC36629	CG14030	0.289238
TXN509	DRSC18594	CG14050	3.42633
KP402	DRSC10164	CG14163	2.64612
KP404	DRSC28408	CG14163	-1.47579
KP402	DRSC19567	CG14211	1.17293
KP404	DRSC27673	CG14211	0.894409
KP407	DRSC36617	CG14211	-1.72181
TXN504	DRSC19572	CG14216	-1.00436
TXN506	DRSC27868	CG14216	-0.504036
KP403	DRSC14776	CG14297	3.29167
KP407	DRSC36729	CG14297	0.954296
KP403	DRSC14784	CG14305	-1.2278
KP404	DRSC26679	CG14305	-1.29876
TXN504	DRSC20984	CG14578, bcd	-0.546523
TXN504	DRSC12241	CG14655	-0.297964
TXN507	DRSC29900	CG14655	-0.116643
TXN503	DRSC12253	CG14667	-0.0303732
TXN506	DRSC28216	CG14667	-0.311098
TXN501	DRSC14933	CG14710	1.67032
TXN508	DRSC37431	CG14710	2.91211
KP402	DRSC14937	CG14714	0.27248
KP404	DRSC23337	CG14714	-0.296307
KP404	DRSC28248	CG14714	2.15308
TXN509	DRSC08421	CG14962	-0.243984
TXN509	DRSC37996	CG14962	2.02117
TXN501	DRSC08464	CG15011	-0.516496
TXN508	DRSC37432	CG15011	-0.41466
KP402	DRSC06505	CG15072	-0.954838
KP405	DRSC29149	CG15072	-0.792826
KP408	DRSC29149	CG15072	-1.49415
TXN503	DRSC06506	CG15073	-0.916383
TXN506	DRSC27105	CG15073	-1.37998
TXN506	DRSC24737	CG15269	-0.394088
TXN508	DRSC37433	CG15269	0.664035
TXN504	DRSC20515	CG1529	-0.634413
TXN506	DRSC24433	CG1529	-2.19789
TXN507	DRSC20515	CG1529	-0.246974
TXN504	DRSC18019	CG15336	1.04003
TXN506	DRSC28008	CG15336	1.01906
TXN501	DRSC00451	CG15436	1.09599
TXN507	DRSC29550	CG15436	0.161444
TXN502	DRSC15053	CG15514	-0.674714
TXN507	DRSC29785	CG15514	-0.716276
KP403	DRSC15065	CG15528	1.18744
GEFGAP	DRSC06563	CG15611	0.0706688
TXN503	DRSC15118	CG15696	0.287169
TXN506	DRSC25170	CG15696	0.214204
TXN502	DRSC06581	CG15710	0.290339
TXN502	DRSC06601	CG1602	0.48305
TXN508	DRSC37434	CG1602	-1.72142
TXN501	DRSC06602	CG1603	-0.167539
TXN506	DRSC27982	CG1603	0.794863
TXN507	DRSC06604	CG1621	-0.243227
TXN509	DRSC25252	CG1621	-1.26444
KP401	DRSC19748	CG1637	0.666489
KP403	DRSC18865	CG1637	-0.977902
KP403	DRSC19749	CG1637	-0.799161
KP405	DRSC29080	CG1637	-1.30948
KP408	DRSC29080	CG1637	0.791827
TXN502	DRSC15134	CG1647	-0.295947
TXN508	DRSC37435	CG1647	1.01732
TXN502	DRSC06613	CG1663	-0.435452
TXN506	DRSC28315	CG1663	-0.580973
ER/R	DRSC12285	CG16708	-1.25857
ER/R	DRSC36910	CG16708	0.892897
KP401	DRSC12285	CG16708	-1.48448
KP407	DRSC36700	CG16708	-0.809425
KP407	DRSC36701	CG16708	-0.0904888
KP402	DRSC02515	CG16771	1.34924
KP407	DRSC36640	CG16771	-0.793117
TXN502	DRSC04279	CG16778	1.38128
TXN506	DRSC27208	CG16778	-0.384596
TXN503	DRSC15153	CG16779	0.762895
TXN508	DRSC37436	CG16779	1.62326
TXN503	DRSC15159	CG16899	-1.88367
TXN507	DRSC29407	CG16899	-0.176342
KP403	DRSC18561	CG16903	-0.932471
KP407	DRSC36761	CG16903	-1.97125
TXN504	DRSC18561	CG16903	-1.5484
ER/R	DRSC15166	CG16941	0.573647
TXN508	DRSC37437	CG17068	1.13049
KP403	DRSC23155	CG17090	-1.74629
KP407	DRSC36675	CG17090	-1.04251
KP407	DRSC36676	CG17090	-1.82405
TXN502	DRSC02579	CG17118	2.24682
KP402	DRSC02580	CG17124	-0.313302
KP405	DRSC29139	CG17124	-0.137956
KP408	DRSC29139	CG17124	-1.38044
TXN509	DRSC10252	CG17153	2.09141
TXN503	DRSC08515	CG17181	0.0020394
TXN504	DRSC07887	CG17181	-1.82834
TXN507	DRSC25608	CG17181	-0.563933
TXN509	DRSC15180	CG17186	0.871638
TXN509	DRSC27612	CG17186	1.16795
TXN507	DRSC00494	CG17257	0.0155402
TXN509	DRSC27495	CG17257	1.4152
TXN505	DRSC22448	CG17328	-0.249974
TXN507	DRSC01927	CG17328	-0.890233
TXN507	DRSC25397	CG17328	0.0673825
TXN503	DRSC10265	CG17359	-1.68694
TXN507	DRSC24439	CG17359	0.23929
TXN507	DRSC23446	CG17361	0.889476
TXN502	DRSC06664	CG17385	-0.0659948
TXN506	DRSC26999	CG17385	-0.774671
KP402	DRSC07761	CG17528	0.665334
KP407	DRSC36645	CG17528	-1.97348
KP407	DRSC36646	CG17528	-1.10553
TXN507	DRSC02628	CG17568	0.00438871
TXN508	DRSC37442	CG17568	1.66209
KP402	DRSC20636	CG17598	-1.446
KP407	DRSC36618	CG17598	-1.7748
KP407	DRSC36619	CG17598	-2.11289
TXN501	DRSC00505	CG17612	-1.98435
TXN506	DRSC28366	CG17612	0.0312428
KP402	DRSC11907	CG17698	0.966885
KP407	DRSC36755	CG17698	-1.98786
TXN501	DRSC06687	CG17724	1.08059
TXN506	DRSC27618	CG17724	0.65872
KP401	DRSC08521	CG17746	0.309148
KP404	DRSC23333	CG17746	0.000483972
TXN503	DRSC15273	CG17801	-1.95169
TXN508	DRSC37443	CG17801	1.39522
TXN503	DRSC15274	CG17802	1.47844
TXN507	DRSC24564	CG17802	0.129901
TXN504	DRSC22811	CG17803	-0.572578
TXN502	DRSC15276	CG17806	2.52849
TXN508	DRSC37444	CG17806	1.22449
TXN504	DRSC18484	CG17829	-1.43638
TXN507	DRSC24069	CG17829	-0.352499
TXN509	DRSC15283	CG17836	0.847871
TXN509	DRSC28718	CG17836	0.977652
ER/R	DRSC15286	CG17838	1.19782
TXN507	DRSC02642	CG17912	-0.448282
TXN509	DRSC25285	CG17912	0.554093
TXN504	DRSC15290	CG1792	-0.583828
TXN506	DRSC28745	CG1792	-1.92233
TXN501	DRSC06697	CG18011	0.878542
TXN502	DRSC06706	CG18011	1.94052
KP401	DRSC06710	CG1809	-1.19439
KP407	DRSC36648	CG1809	0.107765
TXN504	DRSC18149	CG18262	0.53361
TXN507	DRSC24242	CG18262	0.836139
TXN503	DRSC10310	CG18265	-0.0159979
TXN508	DRSC37445	CG18265	-0.979838
TXN505	DRSC21682	CG1832	0.939132
TXN507	DRSC29935	CG1832	-0.496769
TXN502	DRSC06752	CG18446	0.82064
TXN508	DRSC37446	CG18446	0.468424
TXN501	DRSC06755	CG1845	0.19919
TXN508	DRSC37447	CG1845	-0.276912
TXN501	DRSC15281	CG18476	-0.154014
TXN508	DRSC37448	CG18476	0.273826
TXN504	DRSC23121	CG18599	0.270161
TXN505	DRSC25823	CG18599	0.928763
TXN501	DRSC14129	CG18616, Lim1	-0.729639
TXN502	DRSC02683	CG18619	0.724882
TXN503	DRSC15391	CG18764	-0.529027
TXN508	DRSC37449	CG18764	-0.309446
KP402	DRSC02702	CG18854	-1.3116
KP405	DRSC29809	CG18854	0.400038
KP408	DRSC29809	CG18854	-1.08395
KP401	DRSC02218	CG18854, IP3K1	-0.398087
KP401	DRSC02218	CG18854, IP3K1	-0.815917
KP404	DRSC23313	CG18854, IP3K1	4.34813
KP404	DRSC23313	CG18854, IP3K1	1.20141
TXN504	DRSC15396	CG1894	-0.080814
TXN508	DRSC37451	CG1894	0.955764
KP401	DRSC15398	CG1906	-0.484685
KP404	DRSC28570	CG1906	0.219885
KP401	DRSC15403	CG1951	-1.18737
KP407	DRSC36747	CG1951	-1.34598
KP407	DRSC36748	CG1951	-0.614301
TXN505	DRSC21828	CG1965	-0.812063
KP403	DRSC15408	CG1973	-0.437858
KP407	DRSC36750	CG1973	-1.93695
KP407	DRSC36751	CG1973	-1.73375
TXN503	DRSC12298	CG2051	-0.656687
TXN507	DRSC29235	CG2051	-1.51223
TXN502	DRSC17128	CG2052	1.27643
TXN504	DRSC17153	CG2052	-0.658844
TXN507	DRSC25407	CG2052	0.835207
KP402	DRSC12304	CG2104	-0.213228
KP407	DRSC36706	CG2104	-1.47606
TXN502	DRSC18206	CG2116	1.22099
TXN507	DRSC24617	CG2116	0.0527623
TXN504	DRSC18207	CG2120	-0.397513
TXN506	DRSC26944	CG2120	-0.00283525
TXN502	DRSC18209	CG2129	-0.222917
TXN507	DRSC24934	CG2129	0.475208
TXN501	DRSC08558	CG2199	-1.41232
TXN506	DRSC26845	CG2199	0.629699
KP401	DRSC03721	CG2201	-1.39524
KP407	DRSC36644	CG2201	-1.41619
TXN507	DRSC23452	CG2202	-0.371388
TXN508	DRSC37452	CG2202	0.0955394
KP403	DRSC19863	CG2577	-2.23244
KP403	DRSC23309	CG2577	-0.233864
KP404	DRSC26322	CG2577	1.13892
TXN504	DRSC22871	CG2678	-0.922795
TXN507	DRSC15446	CG2678	-0.664473
TXN507	DRSC29690	CG2678	0.31559
TXN502	DRSC18589	CG2712	-0.21435
TXN508	DRSC37453	CG2712	0.973821
ER/R	DRSC00535	CG2807	1.39028
TXN509	DRSC18231	CG2875	0.558438
TXN509	DRSC37997	CG2875	0.420023
TXN504	DRSC18236	CG2889	-0.119007
TXN508	DRSC37455	CG2889	-0.664699
KP402	DRSC00554	CG2964	1.17718
KP404	DRSC27524	CG2964	1.99636
TXN502	DRSC06730	CG30020	-0.74047
TXN504	DRSC06252	CG30020	0.793375
TXN502	DRSC05970	CG30077	-0.540489
KP402	DRSC00560	CG3008	2.22679
KP407	DRSC36626	CG3008	-0.772462
KP407	DRSC36627	CG3008	-1.70789
TXN504	DRSC05571	CG30080	0.782846
TXN508	DRSC37456	CG30080	1.39545
GEFGAP	DRSC06748	CG30115	-0.384321
TXN504	DRSC18266	CG3032	2.11913
TXN507	DRSC24426	CG3032	0.602276
TXN502	DRSC04904	CG30431	0.417371
GEFGAP	DRSC04775	CG30440	0.620962
GEFGAP	DRSC06565	CG30456	0.117307
TXN507	DRSC24998	CG3065	0.03543
TXN504	DRSC23106	CG3075	0.327712
KP401	DRSC04337	CG3105	-0.398801
KP404	DRSC28829	CG3105	1.13432
KP407	DRSC36668	CG3105	-1.73693
KP407	DRSC36669	CG3105	-1.96472
TXN503	DRSC14623	CG31126	2.36906
KP401	DRSC14603	CG31140	0.885517
KP403	DRSC15904	CG31140	1.17289
TXN503	DRSC15325	CG31169	-1.5506
TXN504	DRSC13561	CG31169	-0.581588
KP402	DRSC15444	CG31187	0.00311076
KP402	DRSC16575	CG31187	1.04568
TXN502	DRSC16290	CG31224	0.962671
TXN504	DRSC15272	CG31224	1.31219
TXN503	DRSC16058	CG31272	-0.554814
TXN508	DRSC37457	CG31272	2.56648
TXN505	DRSC22164	CG31301	-0.791564
TXN508	DRSC37458	CG31301	0.100348
TXN502	DRSC15610	CG31365	-0.215199
TXN508	DRSC37459	CG31365	1.45739
TXN505	DRSC22275	CG31367	-0.451613
TXN507	DRSC30081	CG31367	-0.313133
TXN501	DRSC15254	CG31388	0.32581
TXN508	DRSC37460	CG31388	-0.160338
TXN509	DRSC14370	CG31460	1.03145
KP402	DRSC16510	CG31469	-1.12715
KP407	DRSC36771	CG31469	1.26246
TXN502	DRSC03698	CG31612	-0.303314
KP402	DRSC02318	CG31640	1.30407
KP402	DRSC02319	CG31640	-0.504274
KP402	DRSC02504	CG31640	-1.20898
KP403	DRSC22866	CG31640	7.55115
KP404	DRSC26352	CG31640	-1.0128
KP405	DRSC02318	CG31640	-1.28996
KP408	DRSC02318	CG31640	0.836617
TXN501	DRSC00700	CG31670	1.18344
TXN508	DRSC37462	CG31670	-0.262672
KP402	DRSC02760	CG31711	-0.919672
KP403	DRSC23297	CG31711	-1.31507
KP407	DRSC36772	CG31711	-1.27509
KP407	DRSC36773	CG31711	-1.27792
KP401	DRSC02228	CG31714	0.129659
KP402	DRSC02229	CG31714	-1.35856
KP402	DRSC02902	CG31714	-0.531493
KP402	DRSC02903	CG31714	2.31156
TXN502	DRSC02830	CG31716	-1.33503
TXN502	DRSC02831	CG31716	0.349186
TXN504	DRSC01230	CG31759	-1.54964
TXN508	DRSC37463	CG31759	-0.848136
TXN504	DRSC01554	CG31782	-0.076506
TXN504	DRSC01556	CG31782	1.43574
TXN505	DRSC22161	CG31904, CG13796	0.316893
TXN509	DRSC00285	CG31955	0.851492
TXN505	DRSC21768	CG32006	0.250308
TXN506	DRSC28120	CG32006	-0.136717
TXN503	DRSC09726	CG32105	-0.106801
TXN506	DRSC26224	CG32105	-0.673673
TXN504	DRSC09265	CG32121	-0.655239
TXN508	DRSC37464	CG32121	-0.109412
TXN503	DRSC10660	CG32133	-0.861361
TXN508	DRSC37465	CG32133	-0.339307
TXN509	DRSC08169	CG32264	2.41754
TXN509	DRSC08285	CG32264	0.127303
TXN509	DRSC25774	CG32264	-1.87962
KP403	DRSC08895	CG32373	-1.2416
KP407	DRSC36774	CG32373	-1.18624
KP407	DRSC36775	CG32373	-0.940812
TXN504	DRSC19556	CG32532	1.08841
TXN504	DRSC19557	CG32532	-0.855112
TXN504	DRSC21370	CG32532	0.371996
KP403	DRSC19913	CG32568	-1.14666
KP407	DRSC36778	CG32568	1.22754
TXN504	DRSC20183	CG32601	-0.205527
TXN506	DRSC27147	CG32601, CG32598	-1.25588
KP403	DRSC19900	CG32649	-2.58116
KP407	DRSC36779	CG32649	-1.73977
KP403	DRSC19778	CG32666	-2.76869
KP403	DRSC23298	CG32666	-0.742567
KP404	DRSC28871	CG32666	-1.49812
KP407	DRSC36780	CG32666	1.07088
KP403	DRSC18210	CG32687	-0.730775
KP403	DRSC18237	CG32687	-1.32007
KP403	DRSC18127	CG32703	-2.21027
KP403	DRSC18227	CG32703	6.52525
KP404	DRSC21895	CG32703	0.468091
TXN507	DRSC23721	CG32767	0.0384575
KP402	DRSC00588	CG3277	-1.15172
KP407	DRSC36622	CG3277	-1.69411
KP407	DRSC36623	CG3277	-0.837826
TXN502	DRSC18406	CG32772	2.85892
TXN505	DRSC22349	CG32772	0.882649
TXN504	DRSC23070	CG32778	-1.52472
TXN506	DRSC26563	CG32778	-0.20473
TXN501	DRSC15470	CG3281	1.33807
TXN506	DRSC28414	CG3281	-1.61156
KP403	DRSC18478	CG32812	1.22876
TXN505	DRSC23151	CG32830	-0.896906
TXN504	DRSC22901	CG32847	0.199014
KP402	DRSC04354	CG3290	-0.497857
KP404	DRSC26474	CG3290	0.872031
KP402	DRSC12138	CG32944	-0.530818
KP402	DRSC12341	CG32944	-1.25865
TXN509	DRSC06573	CG33017	0.596197
TXN509	DRSC06574	CG33017	-0.713591
TXN501	DRSC12567	CG33097	1.14806
TXN507	DRSC25154	CG33097	-0.139636
TXN509	DRSC14487	CG33213	0.220746
TXN503	DRSC10014	CG33260, Trl	-1.56698
GEFGAP	DRSC08891	CG33275	0.147075
TXN508	DRSC37466	CG33557	-0.85337
KP401	DRSC06628	CG33671, CG33672, spt4	0.239909
KP403	DRSC05356	CG33671, CG33672, spt4	-1.68405
TXN501	DRSC06628	CG33671, CG33672, spt4	-0.258663
TXN501	DRSC06628	CG33671, CG33672, spt4	-0.342389
TXN504	DRSC05356	CG33671, CG33672, spt4	-1.83332
TXN503	DRSC05988	CG33786, CG33785	1.84199
TXN506	DRSC26790	CG33786, CG33785	0.230587
TXN503	DRSC15147	CG33936	0.861255
TXN503	DRSC15148	CG33937	-0.122474
TXN501	DRSC00603	CG3407	-2.09563
TXN508	DRSC37467	CG3407	0.385437
TXN502	DRSC00537	CG34340	0.347535
TXN502	DRSC02850	CG34367	0.0558496
TXN506	DRSC28054	CG34367	0.0520965
TXN503	DRSC14701	CG34376	1.30642
TXN507	DRSC25207	CG34376	-1.9103
TXN509	DRSC24983	CG34376	0.0193045
TXN501	DRSC00523	CG34406	2.17625
TXN502	DRSC00606	CG34406	-0.56624
TXN505	DRSC25843	CG34406	-1.16594
TXN504	DRSC20029	CG34422	-2.15952
TXN508	DRSC37496	CG34422	1.2082
KP402	DRSC04375	CG3494	0.626401
KP407	DRSC36670	CG3494	-0.742297
KP402	DRSC04046	CG3530	-2.03591
KP404	DRSC26569	CG3530	2.9203
KP406	DRSC36793	CG3530	0.195536
KP406	DRSC36794	CG3530	-0.371952
ER/R	DRSC00612	CG3542	1.12819
KP401	DRSC18576	CG3573	1.10968
KP406	DRSC36745	CG3573	-0.180754
KP406	DRSC36746	CG3573	-2.17487
ER/R	DRSC00619	CG3605	1.34827
KP401	DRSC04394	CG3608	0.413225
KP407	DRSC36672	CG3608	-1.04671
KP402	DRSC19871	CG3632	0.504759
KP407	DRSC36610	CG3632	-1.79473
KP407	DRSC36611	CG3632	-1.12718
TXN501	DRSC10372	CG3654	-0.760501
TXN508	DRSC37468	CG3654	-0.0629189
TXN504	DRSC18176	CG3711	-1.5439
TXN504	DRSC18647	CG3711	-0.330964
TXN506	DRSC26706	CG3711	-0.0378912
TXN505	DRSC23143	CG3726	1.34896
TXN506	DRSC27453	CG3726	-1.21464
TXN507	DRSC25057	CG3732	-0.833187
KP402	DRSC15514	CG3809	2.45738
KP403	DRSC15514	CG3809	0.922366
KP407	DRSC36713	CG3809	-0.944046
KP401	DRSC15517	CG3837	-1.65717
KP407	DRSC36719	CG3837	-1.22006
KP407	DRSC36720	CG3837	-1.5259
TXN507	DRSC24965	CG3838	-1.24229
TXN508	DRSC37469	CG3838	-0.834957
TXN502	DRSC18327	CG3847	-1.4429
TXN504	DRSC17444	CG3847	-1.05541
TXN506	DRSC26193	CG3847	0.122512
TXN505	DRSC23126	CG3891	4.29994
TXN503	DRSC14150	CG3909	0.910343
TXN508	DRSC37470	CG3909	-1.21083
TXN501	DRSC10389	CG3919	-1.08412
TXN508	DRSC37471	CG3919	-0.305141
KP401	DRSC00637	CG3980	-1.27818
KP407	DRSC36624	CG3980	-0.415328
KP407	DRSC36625	CG3980	-1.14706
TXN501	DRSC15532	CG3995	1.46968
TXN508	DRSC37472	CG3995	-1.45773
KP403	DRSC18339	CG4041	-1.01148
KP404	DRSC26992	CG4041	2.28909
KP402	DRSC07799	CG40410	-0.246433
ER/R	DRSC17741	CG4119	1.67382
TXN504	DRSC18160	CG42499, CG32779	-1.15824
TXN504	DRSC18161	CG42499, CG32779	-0.448555
TXN506	DRSC28554	CG42499, CG32779	-0.429265
ER/R	DRSC12567	CG42724	1.56396
TXN501	DRSC06865	CG4282	-0.69024
TXN508	DRSC37473	CG4282	-0.796727
KP403	DRSC18522	CG4290	3.29955
KP406	DRSC36760	CG4290	-1.45164
KP406	DRSC36761	CG4290	-1.65918
TXN504	DRSC19887	CG4318	0.856008
TXN505	DRSC23146	CG4328	0.485982
TXN506	DRSC28606	CG4328	-0.293036
TXN503	DRSC15566	CG4360	0.107149
TXN507	DRSC30049	CG4360	-0.349458
TXN503	DRSC15570	CG4374	-0.19937
TXN506	DRSC27482	CG4374	0.305492
TXN507	DRSC23956	CG4404	0.214406
TXN508	DRSC37474	CG4404	-0.695734
TXN502	DRSC15576	CG4424	0.181392
TXN508	DRSC37476	CG4424	0.077411
KP402	DRSC10419	CG4446	1.23775
TXN502	DRSC02753	CG4496	-0.955336
TXN508	DRSC37477	CG4496	0.126456
KP402	DRSC15593	CG4546	-0.22782
KP405	DRSC29584	CG4546	0.118301
KP408	DRSC29584	CG4546	-0.515383
TXN504	DRSC18368	CG4557	1.52352
TXN507	DRSC30004	CG4557	-0.408466
TXN504	DRSC18372	CG4575	-0.515199
TXN509	DRSC23828	CG4617	0.778788
TXN509	DRSC37999	CG4617	1.15227
KP402	DRSC00659	CG4629	0.696058
KP404	DRSC27952	CG4629	2.7161
TXN501	DRSC00660	CG4644	-1.67112
TXN508	DRSC37478	CG4644	-0.689764
TXN501	DRSC04483	CG4707	-0.879791
TXN508	DRSC37479	CG4707	0.128593
TXN503	DRSC15633	CG4730	1.28049
TXN505	DRSC24561	CG4730	-0.588093
KP403	DRSC15634	CG4733	-2.71561
KP407	DRSC36732	CG4733	-0.67087
KP407	DRSC36733	CG4733	-0.313361
TXN503	DRSC15654	CG4820	0.0191002
TXN508	DRSC37480	CG4820	0.863557
KP401	DRSC02783	CG4839	-0.203125
KP402	DRSC02784	CG4839	-0.0389247
TXN503	DRSC15663	CG4854	-1.11402
TXN506	DRSC27454	CG4854	0.209885
TXN503	DRSC10458	CG4914	0.391178
TXN508	DRSC37481	CG4914	-0.55696
TXN502	DRSC01924	CG4935	-0.317653
TXN508	DRSC37482	CG4935	-1.02818
TXN502	DRSC15680	CG4936	0.936112
TXN508	DRSC37483	CG4936	-0.617233
KP401	DRSC06904	CG4945	1.97461
KP405	DRSC29644	CG4945	1.35412
KP408	DRSC29644	CG4945	0.562842
KP401	DRSC10470	CG5026	-1.58618
KP407	DRSC36681	CG5026	-0.585897
KP407	DRSC36682	CG5026	0.525125
KP402	DRSC10483	CG5144	-0.350967
KP404	DRSC23349	CG5144	2.39532
KP404	DRSC28762	CG5144	-0.449011
TXN501	DRSC10485	CG5147	3.21024
TXN507	DRSC29157	CG5147	1.27263
KP401	DRSC10486	CG5150	1.01625
KP407	DRSC36680	CG5150	-1.57937
TXN503	DRSC10489	CG5161	-2.08196
KP402	DRSC15729	CG5169	-0.54768
KP407	DRSC36723	CG5169	-1.53055
TXN503	DRSC15750	CG5245	0.525304
TXN507	DRSC29337	CG5245	-0.628055
TXN501	DRSC15769	CG5319	-0.90032
TXN506	DRSC27206	CG5319	0.484848
KP402	DRSC15781	CG5361	1.7405
KP407	DRSC36709	CG5361	1.54369
TXN501	DRSC01992	CG5366	-0.62771
TXN508	DRSC37484	CG5366	1.6931
TXN502	DRSC15786	CG5382	1.67774
TXN508	DRSC37485	CG5382	1.11898
KP403	DRSC15816	CG5483	-0.58519
KP404	DRSC21971	CG5483	-1.16136
KP404	DRSC26140	CG5483	-1.1634
KP405	DRSC15816	CG5483	0.212113
KP407	DRSC36734	CG5483	1.15957
KP407	DRSC36735	CG5483	0.543656
KP408	DRSC15816	CG5483	-1.11405
TXN501	DRSC04515	CG5591	0.681618
TXN502	DRSC04291	CG5591	0.34804
KP402	DRSC10527	CG5626	0.931763
KP404	DRSC27583	CG5626	0.531572
TXN501	DRSC15852	CG5641	0.662846
TXN508	DRSC37486	CG5641	0.160397
KP401	DRSC11781	CG5656	2.22605
KP407	DRSC36698	CG5656	-1.70996
TXN505	DRSC23206	CG5669	0.16802
TXN508	DRSC37487	CG5669	-0.599761
TXN502	DRSC02881	CG5708	4.81697
TXN508	DRSC37488	CG5708	-0.953228
KP401	DRSC06951	CG5757	-0.510738
KP407	DRSC36660	CG5757	-1.54241
KP401	DRSC02896	CG5790	1.75885
KP404	DRSC26201	CG5790	1.65483
KP403	DRSC15953	CG6036	0.0275057
KP404	DRSC23322	CG6036	1.10138
KP401	DRSC10590	CG6114	-0.942436
KP407	DRSC36694	CG6114	-1.49557
KP407	DRSC36695	CG6114	-0.0326744
TXN501	DRSC06967	CG6197	-0.415064
TXN506	DRSC27505	CG6197	0.258134
TXN501	DRSC16002	CG6254	0.573891
TXN508	DRSC37489	CG6254	-1.68226
TXN503	DRSC10612	CG6272	-1.47306
TXN501	DRSC16007	CG6276	-0.147534
TXN506	DRSC27870	CG6276	-2.08954
KP401	DRSC07412	CG6355, CG33981	5.84586
KP404	DRSC28045	CG6355, CG33981	0.213745
KP406	DRSC36797	CG6355, CG33981	-0.873157
KP407	DRSC36588	CG6355, CG33981	2.48169
KP403	DRSC16028	CG6364	-0.927784
KP407	DRSC36742	CG6364	-1.90653
KP402	DRSC02950	CG6380	-0.738236
KP407	DRSC36633	CG6380	-1.14726
KP401	DRSC10655	CG6498	2.40623
KP405	DRSC29525	CG6498	0.169943
KP408	DRSC29525	CG6498	-0.128392
TXN501	DRSC16084	CG6654	0.743596
TXN508	DRSC37490	CG6654	1.05673
KP401	DRSC16085	CG6656	0.533641
KP407	DRSC36737	CG6656	-0.654152
KP407	DRSC36738	CG6656	-1.17749
TXN509	DRSC10694	CG6683	1.07767
TXN509	DRSC25674	CG6683	-1.16917
TXN501	DRSC02979	CG6686	2.55626
TXN506	DRSC27705	CG6686	-1.04602
TXN508	DRSC37491	CG6686	2.35432
TXN501	DRSC16095	CG6689	0.109801
TXN506	DRSC28313	CG6689	-0.123231
TXN502	DRSC07009	CG6751	0.426168
TXN508	DRSC37492	CG6751	-0.5134
TXN503	DRSC10706	CG6765	-1.75462
TXN505	DRSC24612	CG6765	0.771726
TXN501	DRSC16118	CG6791	0.273223
TXN507	DRSC29079	CG6791	-0.930314
TXN501	DRSC02994	CG6792	0.13286
TXN508	DRSC37493	CG6792	-0.68082
KP403	DRSC16119	CG6800	-2.20076
KP401	DRSC07011	CG6805	-0.603901
KP405	DRSC29352	CG6805	-0.356544
KP408	DRSC29352	CG6805	-0.957965
TXN503	DRSC16121	CG6808	1.03966
TXN503	DRSC14934	CG6808, CG14711	0.144822
TXN503	DRSC14934	CG6808, CG14711	-0.872884
TXN506	DRSC23982	CG6808, CG14711	2.14257
TXN506	DRSC23982	CG6808, CG14711	-1.50964
TXN503	DRSC16122	CG6813	0.48694
TXN508	DRSC37494	CG6813	-0.684827
TXN503	DRSC10725	CG6843	-0.147189
TXN507	DRSC29943	CG6843	-0.642172
TXN501	DRSC10728	CG6854	1.18261
TXN503	DRSC10729	CG6854	-1.69255
TXN504	DRSC09342	CG6854	-2.87751
TXN501	DRSC08577	CG6905	1.00586
TXN503	DRSC08687	CG6905, Roc1b	1.45605
TXN506	DRSC26879	CG6905, Roc1b	2.96134
TXN503	DRSC16917	CG6937, btn	2.65692
KP401	DRSC08144	CG7028	0.591288
KP404	DRSC27510	CG7028	-0.204559
TXN509	DRSC16181	CG7045	0.0684114
TXN503	DRSC16182	CG7046	-0.955127
TXN503	DRSC16186	CG7056	-2.13216
TXN507	DRSC29035	CG7056	1.04955
KP401	DRSC16188	CG7069	1.30567
KP407	DRSC36739	CG7069	0.815218
KP407	DRSC36740	CG7069	1.12781
KP402	DRSC03005	CG7094	0.933635
KP405	DRSC29956	CG7094	-0.855289
KP408	DRSC29956	CG7094	-2.42808
KP402	DRSC07014	CG7097	-0.382167
KP402	DRSC07015	CG7097	-1.21368
KP402	DRSC07016	CG7097	-0.354579
KP404	DRSC28168	CG7097	1.67382
TXN501	DRSC03006	CG7099	1.2725
TXN506	DRSC27321	CG7099	-0.715889
TXN502	DRSC20023	CG7101	-0.430502
TXN504	DRSC22845	CG7101	1.98231
TXN508	DRSC37495	CG7101	0.680446
KP402	DRSC02000	CG7115	-1.43388
KP405	DRSC29878	CG7115	0.00951578
KP408	DRSC29878	CG7115	-0.00895124
KP402	DRSC03013	CG7134	0.709176
KP404	DRSC26430	CG7134	3.7465
KP401	DRSC16207	CG7156	-1.55029
KP404	DRSC27345	CG7156	1.01001
KP407	DRSC36726	CG7156	-1.7353
KP402	DRSC03021	CG7180	-0.772986
KP407	DRSC36634	CG7180	-0.676081
KP407	DRSC36635	CG7180	1.11879
KP401	DRSC09674	CG7207	-1.77287
KP406	DRSC36789	CG7207	-1.67255
KP406	DRSC36790	CG7207	-0.282572
KP402	DRSC03037	CG7236	-0.897659
KP404	DRSC26976	CG7236	0.334334
GEFGAP	DRSC10066	CG7323	-0.0182113
TXN502	DRSC16234	CG7357	0.942248
KP402	DRSC16236	CG7362	0.605863
KP405	DRSC29548	CG7362	-0.197255
KP407	DRSC36718	CG7362	-0.975737
KP408	DRSC29548	CG7362	-0.469404
TXN504	DRSC22821	CG7368	-0.750401
TXN507	DRSC10826	CG7368	0.369459
TXN507	DRSC29098	CG7368	0.379686
TXN501	DRSC10827	CG7372	0.334975
TXN507	DRSC29714	CG7372	-0.501949
ER/R	DRSC10828	CG7375	1.33285
KP403	DRSC20041	CG7378	-0.179016
KP407	DRSC36616	CG7378	-1.4907
TXN503	DRSC10832	CG7386	-0.73522
TXN507	DRSC29368	CG7386	0.777886
KP401	DRSC10857	CG7497	-2.54499
KP404	DRSC28188	CG7497	-0.208691
KP401	DRSC11836	CG7597	4.04589
KP404	DRSC23323	CG7597	-0.343549
KP405	DRSC29623	CG7597	2.74606
KP408	DRSC29623	CG7597	0.656385
TXN501	DRSC11836	CG7597	-0.227464
TXN505	DRSC23323	CG7597	-0.975393
TXN507	DRSC29623	CG7597	-1.04395
KP402	DRSC10890	CG7616	-0.893962
KP407	DRSC36684	CG7616	-0.938567
KP407	DRSC36685	CG7616	-0.357243
TXN503	DRSC16287	CG7691	0.297508
TXN508	DRSC37497	CG7691	0.57237
TXN509	DRSC23103	CG7745	-1.53632
TXN509	DRSC29591	CG7745	-1.3678
TXN502	DRSC07045	CG7786	1.38829
TXN506	DRSC26604	CG7786	0.35087
TXN503	DRSC10916	CG7804	-0.0976053
TXN506	DRSC28623	CG7804	-0.867609
TXN501	DRSC03073	CG7818	0.216107
TXN508	DRSC37498	CG7818	0.221895
TXN509	DRSC10921	CG7839	0.0244122
TXN509	DRSC38000	CG7839	-0.196671
TXN502	DRSC16349	CG7928	-1.07665
TXN508	DRSC37499	CG7928	0.904781
TXN503	DRSC16355	CG7963	1.6636
TXN508	DRSC37500	CG7963	-1.60573
TXN501	DRSC16357	CG7987	0.756418
TXN507	DRSC30002	CG7987	-0.593998
KP401	DRSC08610	CG7995	-0.745457
KP407	DRSC36677	CG7995	-1.4919
KP402	DRSC07062	CG8057	-0.386283
KP404	DRSC21464	CG8057	1.19072
KP404	DRSC23316	CG8057	2.65692
TXN502	DRSC07074	CG8089	0.741794
TXN508	DRSC37501	CG8089	-0.0482803
KP403	DRSC20080	CG8105	-1.1161
KP407	DRSC36606	CG8105	1.27833
TXN504	DRSC20082	CG8117	-0.32571
TXN506	DRSC27713	CG8117	-0.699861
TXN504	DRSC20083	CG8119	-0.811154
TXN506	DRSC27407	CG8119	-0.886869
TXN503	DRSC16389	CG8145	0.27836
TXN506	DRSC26026	CG8145	-0.844011
TXN503	DRSC16392	CG8159	-0.161258
TXN506	DRSC27425	CG8159	-0.83377
ER/R	DRSC20088	CG8173	0.152779
ER/R	DRSC36823	CG8173	0.309174
KP403	DRSC20088	CG8173	0.854193
KP407	DRSC36613	CG8173	-1.41523
KP403	DRSC23019	CG8179	-2.84337
KP404	DRSC25838	CG8179	1.36197
KP407	DRSC36654	CG8179	-1.26352
KP407	DRSC36655	CG8179	-0.797061
TXN509	DRSC07112	CG8216	1.61198
ER/R	DRSC07119	CG8237	1.1213
ER/R	DRSC16400	CG8273	-0.753748
KP402	DRSC16404	CG8286	-1.4606
KP404	DRSC27012	CG8286	-0.156832
TXN501	DRSC07135	CG8290	-0.195215
TXN506	DRSC26133	CG8290	-0.474194
KP402	DRSC07138	CG8298	0.399413
KP407	DRSC36649	CG8298	-1.21824
KP407	DRSC36650	CG8298	-1.70918
TXN503	DRSC16405	CG8301	-1.79732
TXN506	DRSC28170	CG8301	-1.08828
TXN503	DRSC16407	CG8319	0.268938
TXN505	DRSC24607	CG8319	0.530514
TXN503	DRSC16412	CG8359	0.422114
TXN508	DRSC37503	CG8359	0.421633
TXN502	DRSC07157	CG8388	-0.0605494
TXN508	DRSC37504	CG8388	-0.809705
TXN503	DRSC16427	CG8478	-0.893694
TXN508	DRSC37505	CG8478	-0.69161
KP401	DRSC07192	CG8485	6.35333
KP404	DRSC23332	CG8485	2.64733
KP402	DRSC20109	CG8509	1.00701
KP407	DRSC36607	CG8509	-0.955815
GEFGAP	DRSC20111	CG8557	-0.151438
KP403	DRSC20112	CG8565	-1.12983
KP407	DRSC36608	CG8565	-0.361676
KP407	DRSC36609	CG8565	-1.37272
TXN502	DRSC20114	CG8578	0.165288
TXN508	DRSC37506	CG8578	-1.86721
ER/R	DRSC16441	CG8630	1.12781
TXN509	DRSC07225	CG8632	-0.250349
TXN509	DRSC38001	CG8632	2.59038
KP401	DRSC07250	CG8726	2.78169
KP404	DRSC26566	CG8726	1.74373
TXN509	DRSC23043	CG8765	1.13519
TXN509	DRSC26371	CG8765	0.46277
KP401	DRSC11046	CG8789	-1.58672
KP403	DRSC09626	CG8789	-0.652544
KP403	DRSC21373	CG8789	-1.74837
KP402	DRSC16451	CG8866	-1.51789
KP405	DRSC29838	CG8866	0.166984
KP408	DRSC29838	CG8866	-0.434081
TXN503	DRSC16452	CG8870	0.224043
TXN508	DRSC37507	CG8870	0.905102
KP402	DRSC05953	CG8878	-0.64906
KP406	DRSC36783	CG8878	0.188637
KP406	DRSC36784	CG8878	-0.325211
TXN504	DRSC23027	CG8924	-0.628297
TXN508	DRSC37508	CG8924	0.213881
TXN505	DRSC23741	CG8944	-0.884354
TXN508	DRSC37509	CG8944	-0.676914
TXN501	DRSC07300	CG8950	0.338239
TXN508	DRSC37510	CG8950	-0.233185
TXN502	DRSC20153	CG9104	-1.44728
TXN508	DRSC37511	CG9104	0.817819
TXN501	DRSC08628	CG9139	-0.555734
TXN507	DRSC29819	CG9139	-0.936218
TXN504	DRSC20171	CG9215	-0.739825
TXN508	DRSC37512	CG9215	-0.455181
KP402	DRSC03158	CG9222	1.98445
KP402	DRSC04535	CG9236	0.839444
KP407	DRSC36663	CG9236	-1.04918
KP402	DRSC11055	CG9238	1.29986
KP407	DRSC36692	CG9238	-0.687682
KP407	DRSC36693	CG9238	-1.42827
TXN501	DRSC03192	CG9305	0.182288
TXN507	DRSC28804	CG9305	-0.508967
KP401	DRSC11065	CG9311	0.951575
KP404	DRSC28489	CG9311	0.00496327
KP402	DRSC03202	CG9326	-1.52172
KP407	DRSC36642	CG9326	1.46378
TXN501	DRSC04554	CG9418	0.471803
TXN505	DRSC25355	CG9418	-0.539477
TXN501	DRSC04555	CG9437	0.139693
KP402	DRSC11075	CG9452	-0.300645
KP404	DRSC23344	CG9452	4.68963
TXN506	DRSC26447	CG9571	0.147905
TXN502	DRSC20199	CG9609	-0.542014
TXN506	DRSC26952	CG9609	0.445413
KP401	DRSC11081	CG9619	-0.602675
KP407	DRSC36696	CG9619	-1.39024
KP407	DRSC36697	CG9619	-1.27353
TXN504	DRSC17507	CG9650	-0.316052
TXN505	DRSC25005	CG9650	1.4045
TXN508	DRSC37513	CG9650	-0.104642
TXN501	DRSC11094	CG9705	-0.613856
TXN508	DRSC37514	CG9705	0.794707
TXN501	DRSC12585	CG9727	0.0643978
TXN507	DRSC28868	CG9727	5.10451
KP401	DRSC16553	CG9746	-0.552559
KP407	DRSC36707	CG9746	-1.30949
KP407	DRSC36708	CG9746	-0.72918
KP403	DRSC20210	CG9784	-1.30426
KP404	DRSC28204	CG9784	-1.78946
TXN503	DRSC16564	CG9793	-1.13487
TXN507	DRSC29605	CG9793	-0.59235
TXN501	DRSC16566	CG9797	6.07302
TXN507	DRSC29073	CG9797	0.164316
TXN502	DRSC04586	CG9876	0.361505
TXN508	DRSC37515	CG9876	-1.09899
TXN502	DRSC04590	CG9890	-0.405806
TXN505	DRSC25594	CG9890	-0.931887
TXN502	DRSC04593	CG9895	4.09125
TXN507	DRSC30003	CG9895	0.309494
KP402	DRSC00738	CG9961	-0.500653
KP404	DRSC23343	CG9961	1.25616
KP404	DRSC25842	CG9961	0.654738
KP402	DRSC00739	CG9962	0.446015
KP404	DRSC27772	CG9962	4.60449
TXN501	DRSC00745	Chd1	0.659824
TXN508	DRSC37516	Chd1	-0.377966
TXN503	DRSC11114	Chd3	0.118804
TXN505	DRSC23701	Chd3	-1.28233
TXN504	DRSC18447	CHES-1-like	-0.0184979
TXN508	DRSC37517	CHES-1-like	-0.511874
TXN501	DRSC04602	Chi	-0.166975
TXN506	DRSC28484	Chi	-2.16957
TXN502	DRSC00485	chinmo	1.79668
TXN502	DRSC00509	chinmo	2.98896
TXN505	DRSC22413	chinmo	-0.421774
TXN506	DRSC28547	chinmo	-1.17855
TXN501	DRSC03341	chm	-0.0755795
TXN505	DRSC24941	chm	-1.33654
TXN501	DRSC06086	chn	0.539544
TXN507	DRSC29342	chn	-1.59221
TXN501	DRSC11630	Chro	2.12937
TXN508	DRSC37518	Chro	1.53995
TXN504	DRSC17172	ci	1.32633
TXN508	DRSC37519	ci	-0.886484
TXN504	DRSC21243	cic	-1.63737
TXN505	DRSC25516	cic	-0.643969
KP403	DRSC20231	CkIalpha	-2.34679
KP403	DRSC22609	CkIalpha	-2.04255
KP403	DRSC23308	CkIalpha	2.07683
KP404	DRSC25564	CkIalpha	1.27483
KP402	DRSC11946	CkIIalpha	0.751834
KP407	DRSC36781	CkIIalpha	-0.547065
TXN503	DRSC11115	CkIIalpha-i1	0.489243
TXN508	DRSC37520	CkIIalpha-i1	-1.35001
KP403	DRSC20230	CkIIbeta	-1.793
KP402	DRSC07361	CkIIbeta2	-1.59459
KP406	DRSC36774	CkIIbeta2	-1.65499
KP401	DRSC03292	Cks30A	-1.18039
KP406	DRSC36661	Cks30A	-1.26038
TXN503	DRSC11117	Clk	0.139423
TXN508	DRSC37521	Clk	-0.993755
TXN502	DRSC15289	cnc	-0.775505
TXN503	DRSC15600	cnc	2.75319
TXN503	DRSC15601	cnc	2.34463
ER/R	DRSC07242	Coil	-0.858946
TXN502	DRSC04138	comr	-0.514653
TXN508	DRSC37522	comr	0.276232
TXN502	DRSC19881	CoRest	0.122009
TXN505	DRSC22305	CoRest	0.385653
TXN504	DRSC22988	corto	-2.30776
TXN505	DRSC25778	corto	-0.0981539
TXN501	DRSC16607	Cp190	3.14998
TXN508	DRSC37523	Cp190	1.55384
TXN506	DRSC26079	CR33987	0.494374
TXN502	DRSC18387	CR40450, CG32767	1.23499
TXN507	DRSC37377	CR40580	0.0324786
TXN502	DRSC03513	crc	-0.51894
TXN508	DRSC37524	crc	-0.904668
TXN501	DRSC11122	CrebA	-0.852282
TXN508	DRSC37525	CrebA	-1.33285
TXN505	DRSC23558	CrebB-17A	-1.66103
TXN503	DRSC16595	CREG	1.61802
TXN504	DRSC22882	Crg-1, CR42205	-1.48057
TXN507	DRSC29136	Crg-1, CR42205	-0.170393
TXN507	DRSC29346	croc	-1.45842
TXN501	DRSC03514	crol	0.42825
TXN504	DRSC21348	crol	-0.257682
TXN506	DRSC26800	crol	0.30933
TXN502	DRSC03515	crp	1.90235
TXN508	DRSC37526	crp	-0.49643
KP403	DRSC23272	Csk	-2.59869
KP404	DRSC26697	Csk	1.18061
KP407	DRSC36711	Csk	-1.24525
KP407	DRSC36712	Csk	-1.00828
TXN505	DRSC22381	CSN5	-1.10151
TXN506	DRSC27904	CSN5	0.26065
KP401	DRSC02257	CSN8	-0.948495
KP403	DRSC18756	csw	4.00769
KP404	DRSC23326	csw	4.5972
KP406	DRSC36599	csw	-1.13244
KP406	DRSC36600	csw	-0.976123
TXN504	DRSC18757	ct	-0.941813
TXN505	DRSC25100	ct	-0.99482
TXN501	DRSC11004	CTCF	-0.542495
TXN506	DRSC28022	CTCF	1.43234
TXN508	DRSC37438	cwo	1.5327
TXN508	DRSC37439	cwo	0.41193
TXN503	DRSC11337	cyc	0.106454
TXN508	DRSC37527	cyc	0.135225
KP401	DRSC11123	CycA	-1.94021
KP403	DRSC09132	CycA	-1.70539
KP407	DRSC36782	CycA	-0.375066
KP401	DRSC04605	CycB	-1.0699
KP407	DRSC36783	CycB	-1.68243
KP401	DRSC16619	CycC	-0.428482
KP406	DRSC36640	CycC	-0.885931
TXN501	DRSC16619	CycC	-0.159517
KP403	DRSC20233	CycD	1.17991
KP404	DRSC25031	CycD	-0.0387418
KP401	DRSC03295	CycE	-0.648204
KP402	DRSC03296	CycE	0.0350075
KP401	DRSC14324	CycG	2.87954
KP403	DRSC14324	CycG	-0.225819
KP404	DRSC23345	CycG	5.80299
KP407	DRSC36752	CycG	-0.379221
KP402	DRSC11861	CycH	0.593425
KP403	DRSC21308	CycH	-1.56709
TXN503	DRSC11861	CycH	-1.67226
TXN504	DRSC21308	CycH	-2.79731
TXN508	DRSC37528	CycH	-0.992704
KP401	DRSC08653	CycJ	0.207286
KP405	DRSC29329	CycJ	-0.670513
KP408	DRSC29329	CycJ	0.119386
TXN501	DRSC08653	CycJ	-0.618032
TXN507	DRSC29329	CycJ	-0.787115
KP401	DRSC03714	CycK	0.763536
KP406	DRSC36762	CycK	-1.32552
TXN501	DRSC03714	CycK	-1.50176
KP401	DRSC11124	CycT	-0.178973
KP403	DRSC23304	CycT	-0.228157
KP405	DRSC29416	CycT	-0.689981
KP406	DRSC36756	CycT	-0.201026
KP406	DRSC36757	CycT	-0.457243
KP408	DRSC29416	CycT	-0.935423
TXN505	DRSC23304	CycT	-1.65812
TXN507	DRSC29416	CycT	-1.09976
TXN502	DRSC20234	Cyp1	-1.1442
TXN506	DRSC27284	Cyp1	-0.588397
TXN503	DRSC11132	D	2.32955
TXN505	DRSC25367	D	0.147661
TXN501	DRSC11133	D19A	-0.112592
TXN506	DRSC26967	D19A	-0.0808019
TXN503	DRSC11134	D19B	1.21179
TXN505	DRSC25382	D19B	-0.0193051
TXN501	DRSC04881	d4	-1.91178
TXN504	DRSC22674	d4	0.100174
TXN506	DRSC26581	d4	-0.693058
TXN502	DRSC03517	da	0.489414
TXN508	DRSC37529	da	-1.7086
TXN502	DRSC03518	dac	-0.399098
TXN508	DRSC37530	dac	0.411328
TXN501	DRSC16642	Dad	-0.370641
TXN506	DRSC28345	Dad	-1.64407
KP401	DRSC16643	Dak1	-0.251292
KP407	DRSC36589	Dak1	-0.185085
TXN502	DRSC18419	dalao	0.37404
TXN507	DRSC18419	dalao	-0.401289
TXN507	DRSC28822	dalao	-0.564448
KP401	DRSC07601	dap	0.190208
KP406	DRSC36662	dap	0.169077
KP406	DRSC36663	dap	-1.62098
KP401	DRSC16929	dco	1.4096
KP405	DRSC29211	dco	1.17363
KP407	DRSC36788	dco	0.281822
KP408	DRSC29211	dco	-0.30457
KP402	DRSC02150	Ddr	0.962454
KP402	DRSC03229	Ddr	-0.713062
KP402	DRSC03230	Ddr	-1.46881
KP403	DRSC22818	Ddr	-0.511641
KP405	DRSC03229	Ddr	-0.848265
KP408	DRSC03229	Ddr	-0.104738
TXN506	DRSC25984	Deaf1	2.55125
TXN507	DRSC04965	debcl	-0.710018
TXN509	DRSC30010	debcl	-0.180565
TXN502	DRSC16931	dei	-1.32862
TXN506	DRSC27383	dei	0.0434593
TXN509	DRSC23928	Dek	-0.444271
TXN509	DRSC38002	Dek	0.903481
TXN508	DRSC37531	Df31	-1.24687
ER/R	DRSC03207	dFAST	-0.68469
TXN503	DRSC12593	Dfd	-1.61995
TXN506	DRSC27981	Dfd	0.733455
KP402	DRSC06782	Dgk	-2.03793
KP403	DRSC05064	Dgk	-1.2963
KP403	DRSC05065	Dgk	0.791345
KP404	DRSC25166	Dgk	0.340979
KP405	DRSC06782	Dgk	0.198294
KP408	DRSC06782	Dgk	4.67184
KP401	DRSC07399	Dgkepsilon	-0.472323
KP406	DRSC36733	Dgkepsilon	0.252796
TXN502	DRSC03316	Dif	-0.263008
TXN502	DRSC02442	Dif, CG15141	1.89524
TXN504	DRSC20321	dik	-1.10016
TXN504	DRSC20322	dik	0.320152
TXN502	DRSC03100	dimm	-1.00366
TXN508	DRSC37532	dimm	1.7488
TXN506	DRSC27354	DIP1	-0.170887
TXN509	DRSC12346	Dip2	-0.154645
TXN503	DRSC07401	Dip3	-0.675551
TXN507	DRSC29615	Dip3	-0.19676
TXN505	DRSC25113	disco	-1.20072
TXN504	DRSC20173	disco-r	0.442631
TXN504	DRSC20174	disco-r	-0.0739655
TXN502	DRSC03521	dl	-0.605276
TXN507	DRSC29023	dl	0.303226
KP401	DRSC20324	dlg1	-1.60358
KP403	DRSC18896	dlg1	-0.380886
KP403	DRSC19767	dlg1	-0.73178
KP405	DRSC29546	dlg1	0.165828
KP407	DRSC36787	dlg1	1.11244
KP408	DRSC29546	dlg1	0.0364274
TXN502	DRSC04610	Dll	1.07601
TXN506	DRSC27225	Dll	1.80477
TXN503	DRSC08705	dlt	0.435352
TXN506	DRSC26168	dlt	1.77843
TXN505	DRSC23360	dm	0.377598
TXN508	DRSC37533	dm	-0.625443
TXN505	DRSC23784	dmrt11E	0.0357321
TXN503	DRSC15865	dmrt93B	0.172007
TXN507	DRSC29931	dmrt93B	0.428957
TXN505	DRSC25777	dmrt99B	1.53774
KP403	DRSC16933	dnk	-2.36756
KP405	DRSC29240	dnk	-0.883541
KP408	DRSC29240	dnk	-0.916196
KP401	DRSC03522	dnt	0.0975815
KP404	DRSC25886	dnt	3.79917
KP406	DRSC36749	dnt	-1.96498
ER/R	DRSC13892	doa	1.29589
ER/R	DRSC13895	doa	0.780094
KP401	DRSC16650	Doa	0.192904
KP403	DRSC13892	Doa	0.804336
KP403	DRSC13893	Doa	0.574329
KP403	DRSC13896	Doa	1.68346
KP406	DRSC36602	Doa	-1.11836
KP406	DRSC36603	Doa	-1.00511
TXN503	DRSC11146	Doc1	3.05553
TXN505	DRSC25859	Doc1	-1.81241
TXN504	DRSC22716	Doc2	0.11617
TXN505	DRSC25293	Doc2	0.0174607
TXN503	DRSC10480	Doc3	2.26485
TXN506	DRSC28205	Doc3	-0.815269
KP402	DRSC19583	dome	1.71822
KP407	DRSC36769	dome	-1.51574
KP407	DRSC36770	dome	-0.282284
ER/R	DRSC07402	Dp	-0.785156
ER/R	DRSC37534	Dp	-0.8457
TXN501	DRSC07402	Dp	-2.01761
TXN502	DRSC00472	dp	0.0512933
TXN504	DRSC00233	dp	0.440708
TXN504	DRSC00234	dp	1.63573
TXN508	DRSC37534	Dp	-1.80364
TXN502	DRSC07605	dpn	-0.162421
TXN506	DRSC28443	dpn	-1.22217
KP402	DRSC00813	dpp	-2.58446
KP403	DRSC00118	dpp	2.32956
KP403	DRSC00121	dpp	0.122978
KP404	DRSC26853	dpp	0.831429
KP407	DRSC36785	dpp	0.608692
ER/R	DRSC22708	Dr	0.181825
TXN504	DRSC22708	Dr	0.12065
TXN501	DRSC03319	Dref	1.5107
TXN508	DRSC37535	Dref	-1.15491
KP401	DRSC03523	drl	-0.323493
KP404	DRSC28564	drl	-0.132183
KP402	DRSC06155	Drl-2	0.531197
KP402	DRSC06858	Drl-2	-0.428989
KP403	DRSC05393	Drl-2	-0.587813
KP407	DRSC36652	Drl-2	2.93177
KP407	DRSC36653	Drl-2	1.17963
TXN502	DRSC00277	drm	0.0253197
TXN508	DRSC37536	drm	1.43321
TXN505	DRSC23510	dsf	-0.403067
TXN508	DRSC37537	dsf	0.395649
KP401	DRSC18462	Dsor1	2.18232
KP404	DRSC27547	Dsor1	1.65378
TXN504	DRSC23078	Dsp1	-1.42995
TXN506	DRSC28760	Dsp1	-0.265591
ER/R	DRSC07698	dStau	-0.166071
ER/R	DRSC34478	dStau	1.65881
TXN504	DRSC12649	dsx	-0.474766
TXN506	DRSC26707	dsx	0.142005
TXN502	DRSC04680	dve	0.18099
TXN506	DRSC28692	dve	-0.664555
TXN502	DRSC18766	dwg	-0.518063
TXN507	DRSC29174	dwg	-0.224167
TXN503	DRSC14529	dys	1.31807
TXN503	DRSC14896	dys	-0.169633
TXN501	DRSC08583	E(bx)	-1.29075
TXN503	DRSC08172	E(bx)	-0.693062
TXN503	DRSC08509	E(bx)	-1.5353
TXN502	DRSC07408	E(Pc)	1.64159
TXN504	DRSC05281	E(Pc)	3.97532
TXN502	DRSC18768	e(r)	-1.09134
ER/R	DRSC16654	E(spl)	-1.28174
ER/R	DRSC28065	E(spl)	0.0729826
TXN503	DRSC16654	E(spl)	-1.68114
TXN506	DRSC28065	E(spl)	-1.11249
TXN505	DRSC23242	E(var)3-9	3.02796
TXN507	DRSC29480	E(var)3-9	1.96456
TXN502	DRSC20326	e(y)1	-1.61415
TXN505	DRSC25903	e(y)1	1.22242
TXN504	DRSC19640	e(y)2	1.28378
TXN509	DRSC11147	E(z)	0.0834703
TXN509	DRSC29388	E(z)	0.876318
TXN503	DRSC16655	E2f	0.747732
TXN507	DRSC29572	E2f	0.071568
TXN501	DRSC03320	E2f2	1.40414
TXN508	DRSC37538	E2f2	0.788049
TXN505	DRSC23157	E5	-0.185745
TXN506	DRSC28326	E5	-1.432
TXN503	DRSC16939	ea	-0.188978
TXN505	DRSC25595	ea	0.510377
TXN501	DRSC15675	ear	1.18107
TXN505	DRSC24291	ear	-1.55049
KP403	DRSC20329	eas	1.85175
KP405	DRSC29435	eas	-0.8376
KP407	DRSC36786	eas	-1.06509
KP408	DRSC29435	eas	-0.774331
TXN501	DRSC08574	ecd	-0.00531464
TXN508	DRSC37539	ecd	-0.271169
ER/R	DRSC04906	EcR	0.800188
ER/R	DRSC04910	EcR	-1.66298
TXN501	DRSC04910	EcR	0.0421794
TXN502	DRSC04906	EcR	0.154197
KP402	DRSC07409	EDTP	-0.965583
KP406	DRSC36785	EDTP	-1.922
KP406	DRSC36786	EDTP	-1.8272
ER/R	DRSC03737	Ef2b	-0.832427
TXN503	DRSC11885	eg	0.0538091
TXN506	DRSC26147	eg	-0.179873
KP401	DRSC04613	Egfr	-0.727098
KP403	DRSC03871	Egfr	-1.39581
KP406	DRSC36621	Egfr	-0.346934
KP406	DRSC36622	Egfr	0.309327
TXN506	DRSC28455	egg	-1.09022
ER/R	DRSC16938	eIF-3p66	-0.122187
ER/R	DRSC16332	eIF2B-alpha	-1.43278
ER/R	DRSC06905	eIF3-S8	-1.04383
ER/R	DRSC06900	eIF3-S9	-0.00329438
KP401	DRSC08658	Eip63E	-0.77499
KP406	DRSC36655	Eip63E	-0.35767
TXN503	DRSC11160	Eip74EF	-0.904665
TXN505	DRSC23794	Eip74EF	1.02429
TXN504	DRSC23047	Eip75B	-1.99181
TXN508	DRSC37540	Eip75B	-0.887515
TXN504	DRSC23097	Eip78C	2.17362
TXN504	DRSC23072	Eip93F	-1.17895
TXN506	DRSC27506	Eip93F	-0.523197
TXN504	DRSC01379	elB	-0.0392163
TXN505	DRSC25039	elB	0.0577905
TXN502	DRSC16109	EloA	0.113544
TXN505	DRSC23920	EloA	-1.3387
TXN503	DRSC16663	Elongin-B	2.1898
TXN508	DRSC37541	Elongin-B	1.62504
TXN503	DRSC07423	Elongin-C	0.892239
TXN507	DRSC29393	Elongin-C	-1.05512
TXN505	DRSC23238	emc	-0.128359
TXN506	DRSC28439	emc	0.288509
TXN505	DRSC25044	ems	0.362907
TXN508	DRSC37542	ems	0.186502
TXN502	DRSC07609	en	0.67269
TXN505	DRSC25628	en	-0.239923
TXN501	DRSC04096	enok	-1.29563
TXN508	DRSC37543	enok	-0.3906
KP403	DRSC17164	Eph	-2.31835
KP406	DRSC36767	Eph	-1.97534
KP406	DRSC36768	Eph	-1.89284
ER/R	DRSC19804	ERj3P	1.60785
ER/R	DRSC22494	ERj3P	2.09957
ER/R	DRSC01984	ERj5	0.686014
ER/R	DRSC08660	ero1	-0.290731
ER/R	DRSC07718	ERp31	1.08733
ER/R	DRSC26561	ERp32	-0.671228
ER/R	DRSC20215	ERp44	1.85027
ER/R	DRSC29891	ERp60	2.94362
ER/R	DRSC32447	ERp60	2.24044
ER/R	DRSC07309	ERp70	0.0619818
ER/R	DRSC24471	ERp70	1.02897
TXN501	DRSC10840	ERR	0.210683
TXN508	DRSC37544	ERR	0.544406
TXN502	DRSC03530	esg	-1.7851
TXN508	DRSC37545	esg	-1.09775
TXN502	DRSC00751	Ets21C	0.905086
TXN508	DRSC37546	Ets21C	0.272476
TXN501	DRSC10738	Ets65A	-1.11715
TXN501	DRSC11164	Ets65A	-0.182282
TXN503	DRSC09968	Ets65A	-1.18664
TXN503	DRSC16127	Ets96B	-0.69574
TXN506	DRSC27110	Ets96B	-0.493889
TXN504	DRSC16665	Ets97D	1.63485
TXN506	DRSC27682	Ets97D	-0.772929
TXN505	DRSC24625	Ets98B	-0.0365987
ER/R	DRSC40684	eve	0.14546
TXN505	DRSC24980	eve	-0.443018
TXN504	DRSC20330	exd	-0.837875
TXN507	DRSC30099	exd	-0.27662
TXN503	DRSC10972	exex	0.285751
TXN505	DRSC24644	exex	0.0158763
TXN504	DRSC17173	ey	-1.68235
TXN506	DRSC26309	ey	0.394044
TXN501	DRSC03510	eya	-0.792717
TXN508	DRSC37547	eya	-0.146506
TXN505	DRSC23136	eyg	-0.142607
TXN506	DRSC26636	eyg	0.112752
KP402	DRSC07426	Fak56D	-0.669169
KP404	DRSC26626	Fak56D	1.36852
KP406	DRSC36729	Fak56D	-0.407168
KP406	DRSC36730	Fak56D	-0.539753
KP404	DRSC29115	fbl	-1.07922
KP402	DRSC11886	fbl, CG33969	1.13753
KP404	DRSC27922	fbl, CG33969	0.334211
TXN501	DRSC04121	Fcp1	0.152164
TXN506	DRSC26715	Fcp1	0.250656
TXN507	DRSC37420	Fcp1	-0.755705
TXN504	DRSC23032	fd3F	-1.62825
TXN501	DRSC04685	fd59A	-1.05122
TXN505	DRSC25524	fd59A	-0.0633354
TXN503	DRSC08717	fd64A	-0.00270563
TXN505	DRSC25265	fd64A	0.202046
TXN503	DRSC16946	fd96Ca	-0.838382
TXN505	DRSC23974	fd96Ca	1.34486
TXN503	DRSC16947	fd96Cb	-0.410849
TXN505	DRSC25322	fd96Cb	0.584738
TXN503	DRSC12507	Fer1	-0.623573
TXN503	DRSC12555	Fer1	-0.77387
TXN507	DRSC29849	Fer1	-0.725354
TXN503	DRSC15925	Fer2	0.134503
TXN508	DRSC37548	Fer2	0.728131
TXN501	DRSC16133	Fer3	2.00767
TXN504	DRSC16949	fkh	0.556149
TXN506	DRSC28213	fkh	-1.02481
KP403	DRSC17992	flw	-1.94573
KP403	DRSC18774	flw	-0.897791
KP404	DRSC25161	flw	1.54939
ER/R	DRSC16674	Fmr1	0.667553
ER/R	DRSC26781	Fmr1	-0.49368
KP401	DRSC00818	for	-2.74604
KP403	DRSC00195	for	-1.48936
KP404	DRSC25103	for	0.892498
KP406	DRSC36604	for	-1.09662
KP406	DRSC36605	for	-1.10727
TXN501	DRSC15463	foxo	1.89813
TXN508	DRSC37549	foxo	2.5032
KP402	DRSC16673	Fps85D	-0.10356
KP403	DRSC12735	Fps85D	3.49086
KP405	DRSC29894	Fps85D	-0.407367
KP406	DRSC36606	Fps85D	-0.723526
KP408	DRSC29894	Fps85D	-0.847316
ER/R	DRSC16950	fray	-1.10823
ER/R	DRSC36742	fray	-1.64801
KP403	DRSC16950	fray	-2.41873
KP406	DRSC36742	fray	0.11032
KP406	DRSC36743	fray	0.874668
TXN505	DRSC24960	fru	-0.646827
TXN507	DRSC16953	fru	-0.612067
KP401	DRSC18778	fs(1)h	-0.531806
KP404	DRSC29017	fs(1)h	-0.66495
KP405	DRSC18778	fs(1)h	-0.765957
KP408	DRSC18778	fs(1)h	0.283927
ER/R	DRSC03328	Fs(2)Ket	-1.54367
TXN501	DRSC00819	ft	-0.725297
TXN508	DRSC37550	ft	-0.258363
ER/R	DRSC12626	ftz	-0.0211614
ER/R	DRSC28088	ftz	0.0250188
TXN503	DRSC12626	ftz	-1.10251
TXN506	DRSC28088	ftz	0.293484
TXN508	DRSC37551	ftz	0.449687
TXN505	DRSC25015	ftz-f1	-0.180909
TXN508	DRSC37552	ftz-f1	0.188845
KP403	DRSC20333	fu	-1.45137
KP404	DRSC27965	fu	-1.00843
KP406	DRSC36607	fu	0.308562
TXN502	DRSC03324	fu2	-0.219844
TXN508	DRSC37553	fu2	1.18011
ER/R	DRSC17952	Futsch	1.21838
KP401	DRSC08580	fwd	0.559668
KP404	DRSC26680	fwd	-0.729505
KP406	DRSC36636	fwd	0.346871
KP406	DRSC36637	fwd	-1.13078
ER/R	DRSC10087	fz2	-0.624824
TXN509	DRSC18619	G9a	-1.92667
TXN509	DRSC37998	G9a	1.87703
TXN502	DRSC00561	GABA-B-R3	-0.0483925
TXN507	DRSC29404	GABA-B-R3	-0.207504
ER/R	DRSC06033	gadd45	-0.00367832
TXN501	DRSC03156	Gas41	-0.0776494
TXN501	DRSC02803	GATAd	-2.35506
TXN508	DRSC37554	GATAd	-0.764871
TXN505	DRSC23209	GATAe	0.0493737
TXN508	DRSC37555	GATAe	-0.12395
TXN504	DRSC19974	gce	-1.12222
TXN505	DRSC25266	gce	0.291902
ER/R	DRSC03536	gcm	1.00233
TXN502	DRSC03536	gcm	0.0488629
TXN502	DRSC03538	gcm2	0.0121781
TXN507	DRSC29823	gcm2	0.0854268
KP401	DRSC16678	Gcn2	-0.433058
KP403	DRSC16678	Gcn2	2.1189
KP406	DRSC36723	Gcn2	1.98723
KP406	DRSC36724	Gcn2	-0.362764
GEFGAP	DRSC08318	GEF64c	1.23236
KP401	DRSC04688	gek	-1.40012
KP406	DRSC36740	gek	-1.25138
KP406	DRSC36741	gek	-0.230225
TXN501	DRSC06093	gem	-0.975595
TXN502	DRSC06847	gem	3.36504
KP401	DRSC16154	gish	4.49971
KP406	DRSC36673	gish	-1.09105
TXN506	DRSC27242	gl	-0.656049
TXN508	DRSC37556	gl	0.130724
TXN501	DRSC03539	glu	-0.0581964
TXN506	DRSC26151	glu	-0.0940784
TXN501	DRSC04689	gol	-0.109565
KP402	DRSC04618	Gp150	-0.774379
KP404	DRSC29033	Gp150	-0.681802
KP401	DRSC16682	Gprk2	1.64697
KP403	DRSC16682	Gprk2	-1.48895
KP404	DRSC23336	Gprk2	-1.4542
KP406	DRSC36647	Gprk2	-1.8555
KP406	DRSC36648	Gprk2	-2.18397
TXN503	DRSC14593	Gr93a	1.06288
GEFGAP	DRSC20131	Graf	-0.728686
TXN502	DRSC04691	grau	-0.128023
TXN506	DRSC27330	grau	0.527668
TXN501	DRSC07624	grh	1.16992
TXN503	DRSC07625	grh	-1.09713
TXN504	DRSC05680	grh	-0.117897
TXN505	DRSC25829	grn	0.208331
KP401	DRSC03541	grp, CG31782	-0.485695
TXN501	DRSC03541	grp, CG31782	-0.950193
ER/R	DRSC18524	Grp170	1.22464
ER/R	DRSC15827	Grp93	2.49223
ER/R	DRSC27798	Grp93	2.65089
TXN502	DRSC04692	gsb	1.26218
TXN505	DRSC25821	gsb	0.649569
ER/R	DRSC04021	gsb-n	-0.301205
ER/R	DRSC04693	gsb-n	-0.724768
TXN502	DRSC04693	gsb-n	-0.266464
TXN504	DRSC04021	gsb-n	0.433275
TXN502	DRSC00755	Gsc	0.429068
TXN505	DRSC25752	Gsc	0.943134
ER/R	DRSC07436	GstS1	1.28194
TXN504	DRSC23119	gt	0.730757
TXN506	DRSC28482	gt	-1.46675
KP401	DRSC16305	gwl	-1.23542
KP406	DRSC36638	gwl	0.181425
KP406	DRSC36639	gwl	-0.0705945
TXN505	DRSC23249	h	0.540223
TXN507	DRSC30106	h	-0.63191
TXN502	DRSC03339	H15	0.13677
TXN505	DRSC25176	H15	0.57611
TXN504	DRSC22555	H2.0	-0.52807
TXN502	DRSC02070	ham	0.968083
TXN506	DRSC27582	ham	1.3729
TXN502	DRSC02656	Hand	0.449884
TXN505	DRSC23216	hang	-0.012939
TXN507	DRSC29322	hang	-0.0578208
TXN501	DRSC11354	hay	-0.397871
TXN508	DRSC37557	hay	0.36316
TXN501	DRSC16963	hb	1.30761
TXN506	DRSC27856	hb	-1.09777
TXN502	DRSC04239	hbn	-0.0948586
TXN502	DRSC17143	Hcf	0.491944
TXN508	DRSC37558	Hcf	0.870953
KP402	DRSC02317	HDC01074	-1.23677
KP407	DRSC36756	HDC11616	-1.59054
KP403	DRSC17556	HDC17960	1.29285
KP403	DRSC17860	HDC17961	-0.210383
KP403	DRSC19839	hep	-0.30494
KP403	DRSC20337	hep	-1.47079
KP404	DRSC26331	hep	-0.39289
KP406	DRSC36660	hep	-2.26211
ER/R	DRSC14082	heph	1.35079
ER/R	DRSC16783	heph	1.25067
TXN501	DRSC03543	her	-0.46172
TXN504	DRSC19965	Her	-1.69467
TXN508	DRSC37559	Her	-0.105245
TXN508	DRSC37560	her	-0.146686
TXN504	DRSC23030	Hey	0.238014
TXN508	DRSC37561	Hey	0.859605
TXN503	DRSC11181	HGTX	-0.0351014
TXN504	DRSC09319	HGTX	0.35453
TXN505	DRSC23599	hkb	-0.444559
TXN508	DRSC37562	hkb	-0.486137
TXN503	DRSC11182	HLH106	0.322971
TXN508	DRSC37563	HLH106	-0.614048
TXN504	DRSC18669	HLH3B	-0.876728
TXN505	DRSC25447	HLH3B	-0.509627
TXN505	DRSC25228	HLH4C	-0.103563
TXN507	DRSC18670	HLH4C	-0.953594
TXN503	DRSC07438	HLH54F	-1.10529
TXN508	DRSC37564	HLH54F	0.410475
ER/R	DRSC28511	HLHm3	0.00764902
ER/R	DRSC40434	HLHm3	0.0527737
TXN505	DRSC23160	HLHm3	-0.568743
TXN506	DRSC28511	HLHm3	-1.42749
TXN503	DRSC16695	HLHm5	0.477844
TXN506	DRSC28232	HLHm5	-0.890625
TXN503	DRSC16696	HLHm7	-1.386
TXN507	DRSC29451	HLHm7	-0.67559
TXN502	DRSC16697	HLHmbeta	-1.57236
TXN508	DRSC37565	HLHmbeta	-0.611308
TXN503	DRSC16698	HLHmdelta	0.216567
TXN503	DRSC16699	HLHmgamma	0.99001
TXN505	DRSC25532	HLHmgamma	-1.12922
TXN507	DRSC04619	HmgD	0.110948
TXN509	DRSC26171	HmgD	-0.444927
TXN502	DRSC04620	HmgZ	1.18918
TXN504	DRSC03888	HmgZ	-0.434675
TXN504	DRSC17740	Hmr	-0.865373
TXN508	DRSC37566	Hmr	-1.011
TXN505	DRSC25028	Hmx	0.1433
TXN504	DRSC03344	Hnf4	0.290742
TXN506	DRSC26864	Hnf4	-0.222623
KP403	DRSC20340	hop	1.22271
KP404	DRSC23334	hop	1.61286
KP404	DRSC26551	hop	1.85023
TXN504	DRSC18418	HP1b	-1.5011
TXN507	DRSC29826	HP1b	-0.0535219
TXN502	DRSC16166	HP1c	-0.196599
TXN506	DRSC28423	HP1c	-1.06835
TXN507	DRSC16166	HP1c	0.307809
TXN503	DRSC16379	HP1e	0.0962905
TXN502	DRSC00471	HP6	-1.27101
KP401	DRSC06065	hpo	-0.826513
KP407	DRSC36661	hpo	-0.962898
KP407	DRSC36662	hpo	-1.07368
TXN505	DRSC23230	Hr38	-0.503086
TXN506	DRSC28077	Hr38	-0.592301
TXN501	DRSC03346	Hr39	-0.284504
TXN506	DRSC26006	Hr39	0.603572
TXN504	DRSC23080	Hr4	-0.0548239
TXN506	DRSC28298	Hr4	-0.0508638
TXN501	DRSC07441	Hr46	-0.355708
TXN508	DRSC37567	Hr46	-0.220177
TXN502	DRSC06627	Hr51	0.656011
TXN504	DRSC22829	Hr51	-1.13462
ER/R	DRSC11866	Hr78	-0.73708
ER/R	DRSC27893	Hr78	-0.827135
TXN501	DRSC11866	Hr78	3.45629
TXN506	DRSC27893	Hr78	0.0406576
TXN503	DRSC12521	Hr83	-0.494567
TXN505	DRSC25662	Hr83	0.311718
TXN502	DRSC16707	Hr96	-0.0825874
[truncated: 1,442 more rows]

## Sheet: list of hits
Gene ID	FlyBase ID	Human ortholog
AP-2	FBgn0261953	TFAP2BTFAP2B
ash1	FBgn0005386	ASH1L
Asx	FBgn0261823	PHF16 ENSG00000077684 PHF15
atf6	FBgn0033010	ATF6
atg1	FBgn0260945
atg18	FBgn0035850	WIPI1/WIPI2
atg7	FBgn0034366	ATG7
atg8a	FBgn0052672	LC3ap
ball	FBgn0027889	VRK2 VRK3 VRK1
bcd	FBgn0000166	-
Hsc70-3	FBgn0001218	HSPA5
byn	FBgn0011723	KRTAP6-1 ENSG00000249992 ENSG00000257153 ELN PHGR1 KRTAP5-5 DSCAM HMCN1 MYLK3 ENSG00000065534 KRTAP5-8 ENSG00000262483 NKX1-1 ENSG00000262498 ENSG00000258264 HMCN2 KRTAP5-1 ENSG00000257917 ENSG00000263306 CT47B1 DSCAML1 FOXD3 KRTAP5-4 BAG3 ENSG00000262626 MARCKS MYLK2 TTN MYLK4
Caki	FBgn0013759	CASK
Cenp-C	FBgn0086697	-
CG11489	FBgn0025702	ENSG00000135250 SRPK1 SRPK3
CG11902	FBgn0028647	-
CG1227	FBgn0037491	STK16
CG14030	FBgn0031696	-
CG14710	FBgn0037920	-
CG5790	FBgn0032677	CDC7
CG6355	FBgn0028741	PIKFYVE
CG6686	FBgn0032388	SART1
CG7597	FBgn0037093	ENSG00000136807 CDK12 CDK13
CG8485	FBgn0033915	SNRK
chinmo	FBgn0086758	-
Chro	FBgn0044324	-
cnc	FBgn0262975	-
Cp190	FBgn0000283	-
csw	FBgn0000382	ENSG00000179295 PTPN6
CycG	FBgn0039858	-
Dsor1	FBgn0010269	MAP2K5 MAP2K1 MAP2K2
E(pc)	FBgn0000581	EPC1/EPC2
E(var)3-9	FBgn0260243	-
Eip78C	FBgn0004865	-
Elongin-B	FBgn0023212	TCEB2
ERj3P		ERj3P
ERp44	FBgn0014002	PDIA2/PDIA3
ERp60	FBgn0033663	PDIA2 PDILT P4HB PDIA3
foxo	FBgn0038197	FOXO3
Gcn2	FBgn0019990	EIF2AK4
Grp93	FBgn0039562	HSP90A1/B1
hop	FBgn0004864	-
Iswi	FBgn0011604	SMARCA5 ENSG00000102038
JIL-1	FBgn0020412	RPS6KA5 RPS6KA4
Lhr	FBgn0034217	-
lola	FBgn0005630	-
Mbs	FBgn0005536	PPP1R12B PPP1R12A PPP1R12C
MED1	FBgn0037109	ENSG00000125686
MED17	FBgn0038578	MED17
MED23	FBgn0034795	ENSG00000112282
Mkp3	FBgn0036844	DUSP7 DUSP9 DUSP6
mnb	FBgn0259168	DYRK1B ENSG00000157540
Myt1	FBgn0040298	PKMYT1
Nipped-A	FBgn0053554	TRRAP
p53	FBgn0039044	-
Pdk	FBgn0017558	PDK2 PDK4 PDK3 PDK1
polo	FBgn0003124	PLK2 PLK3 PLK1
Pp1alpha-96A	FBgn0003134	PPP1CC PPP1CA
Pp2B-14D	FBgn0011826	PPP3CB PPP3CC
PpY-55A	FBgn0003140	PPP1CC PPP1CA
RACK1	FBgn0020618	RACK1
S1P	FBgn0037105	MBTPS1
SAK	FBgn0026371	PLK4
sdt	FBgn0261873	MPP5 MPP3 MPP7 MPP6 MPP1 ENSG00000108852 MPP4 ENSG00000147044
Sin3A	FBgn0022764	SIN3B SIN3A
sob	FBgn0004892	-
Stam	FBgn0027363	STAM2 STAM
su(Hw)	FBgn0003567	ZNF726
Su(var)3-7	FBgn0003598	-
tefu	FBgn0045035	ATM
Bro	FBgn0013755	CBFB
bs	FBgn0004101	SRF
CaMKI	FBgn0016126	PSKH2 DCX DCLK2 CAMK1 CAMK1G CAMK1D ENSG00000133083 CAMK4 PSKH1 PNCK DCLK3 CAMKV
CaMKII	FBgn0264607	ENSG00000148660 ENSG00000058404 CAMK2A ENSG00000145349
CanA1	FBgn0010015	PPP3CB PPP3CC
CanB	FBgn0010014	ENSG00000221823 ENSG00000188386 WDR92
CanB2	FBgn0015614	ENSG00000221823 ENSG00000188386 WDR92
Cdk8	FBgn0015618	CDK8 CDK19
CG10702	FBgn0032752	-
CG10949	FBgn0032858	-
CG12746	FBgn0037341	ENSG00000147535 ENSG00000203805
CG17090	FBgn0035142	HIPK2 ENSG00000163349 ENSG00000110422
CG16903	FBgn0040394	CCNL1 CCNL2
CG17153	FBgn0036248	-
CG17598	FBgn0031194	PPM1J ENSG00000164088 PPM1H
CG1973	FBgn0260990	SCYL1
CG3105	FBgn0034950	PASK
CG6854	FBgn0262707	CTPS CTPS2
CG7207	FBgn0027569	ENSG00000113163
CG8789	FBgn0036896	MAP3K12 ENSG00000073803
EDTP	FBgn0027506	ENSG00000163719
fray	FBgn0023083	OXSR1
Gprk2	FBgn0261988	GRK4/5/6/7
Jra	FBgn0001291	JUNB JUND JUN
ire1	FBgn0261984	ERN1
kek1	FBgn0015399	-
lkb1	FBgn0038167	STK11
mos	FBgn0033773	-
Pi3K92E	FBgn0015279	PIK3CG PIK3CD ENSG00000051382 PIK3CA
Pink1	FBgn0029891	PINK1
Pkcdelta	FBgn0259680	PRKCQ PRKCD PRKCE PRKCH PRKCA PRKCG PRKCB
wdb	FBgn0027492	PPP2R5D PPP2R5C PPP2R5B PPP2R5A PPP2R5E
xbp1	FBgn0021872	XBP1
			"suppressors" of UPR signaling
			"enhancers" of UPR signaling
