# Supplementary material for: Signaling Networks Converge on TORC1-SREBP Activity to Promote Endoplasmic Reticulum Homeostasis
Source: PLoS One. 2014 Jul 9;9(7):e101164. doi: 10.1371/journal.pone.0101164 (PMC4090155; doi:10.1371/journal.pone.0101164)
Supplement: Table S5 — Raw relative measurements of the content in PC and PE species in wild-type S2R+ cells and SREBP-depleted cells ( figure 5B and C ). (XLSX) [file pone.0101164.s010.xlsx]

## Sheet: PEspecies
	WT1	WT2	WT3	SREBP1	SREBP2	SREBP3
28:1-PE	89.8559	97.5892	93.5906	44.3043	35.2729	36.566
28:0-PE	52.5267	47.2681	53.7363	11.3737	8.29042	9.63211
30:1-PE	10339.2	11240.1	10529	2850.64	2342.95	2485.46
30:0-PE	3399.38	3515.16	3529.86	371.622	297.889	304.952
32:2-PE	941.751	1045.36	1018.05	576.952	481.462	492.695
32:1-PE	8389.52	9389.65	8790.9	4145.75	3486.1	3551.83
32:0-PE	1738.25	1725.46	1907.36	370.637	316.426	319.108
34:4-PE	20.9882	20.4872	20.6885	9.17556	7.10608	7.60708
34:3-PE	41.0514	41.8655	40.753	25.6472	20.6746	21.8554
34:2-PE	1029	1003.72	1030.91	381.311	318.486	317.823
34:1-PE	2048.16	2035.27	2026.7	665.581	535.53	565.915
34:0-PE	522.376	551.797	589.497	198.212	165.036	165.377
36:6-PE	17.6349	22.4711	21.3728	13.4762	11.5088	11.2681
36:5-PE	89.476	91.8601	88.2996	39.5955	32.93	33.0497
36:4-PE	150.012	140.637	151.503	61.8273	50.3862	55.1161
36:3-PE	99.6799	97.6046	99.9252	65.0781	58.1874	57.5623
36:2-PE	1273.69	1262.74	1226.16	526.307	448.507	449.781
36:1-PE	1028.39	1017.58	1000.07	397.57	340.113	348.527
36:0-PE	426.306	420.92	444.992	227.503	196.962	194.177
38:7-PE	21.8005	22.8971	23.8891	16.9651	14.3151	15.6042
38:6-PE	81.7519	74.3287	78.37	51.015	41.8898	40.6332
38:5-PE	125.441	112.852	124.195	81.3016	72.0906	72.1921
38:4-PE	72.996	67.7159	65.4897	46.7906	39.4439	39.3204
38:3-PE	23.0763	23.6271	22.4586	18.8952	16.0144	16.3421
38:2-PE	71.2857	64.2985	71.3108	52.6539	46.447	44.808
38:1-PE	402.289	379.317	396.699	163.803	138.774	138.307
40:9-PE	3.84875	3.27635	3.06319	1.86429	2.11637	2.22459
40:8-PE	6.63248	4.34229	6.19997	6.62718	4.85582	4.77161
40:7-PE	37.4293	36.1684	37.1909	29.6347	23.8414	24.2204
40:6-PE	24.7231	21.7823	24.714	20.1558	17.276	19.1493
40:5-PE	20.0119	21.4133	22.2751	16.8171	13.105	13.7329
40:4-PE	28.0172	26.6412	30.5442	16.1416	13.5427	14.8563
40:3-PE	16.5498	17.1534	17.319	10.2538	8.08445	8.04826
40:2-PE	11.5699	9.62594	11.7224	9.5198	8.39341	8.43994
40:1-PE	95.5163	66.4109	106.038	57.1668	53.0381	48.1737
42:9-PE	1.76286	1.04101	1.47277	1.62992	1.27446	0.903698
42:8-PE	1.36503	0.884051	0.495172	1.3062	0.11586	1.13106
42:7-PE	1.30483	1.04101	1.43318	1.19709	1.68126	1.20527
42:6-PE	3.34107	4.16602	5.04488	2.74438	3.24665	3.43166
42:5-PE	6.70418	3.95643	7.09616	5.24751	5.5896	5.68342
42:4-PE	9.11552	11.3787	12.1257	10.1016	9.83522	9.85342
42:3-PE	6.07554	5.36126	8.00131	7.00187	6.3105	5.92875
42:2-PE	1.19636	2.2165	2.22124	2.86438	1.7688	2.33352
42:1-PE	3.64715	5.67925	2.69046	4.59438	4.58033	4.41814
28:2-aPE	0.471395	0.155904	0.0964837	0.255366	0.196704	0.109735
28:1-aPE	0.524225	0.939121	1.45025	0.730964	0.550463	0.852441
30:2-aPE	3.95028	5.10642	5.77617	3.91246	3.47837	3.65358
30:1-aPE	70.2723	76.8288	70.996	50.614	41.5808	45.0543
30:0-aPE	29.9775	29.9271	29.1172	10.0115	7.85273	8.51513
32:2-aPE	12.5974	10.8426	13.5418	13.4322	11.586	13.0987
32:1-aPE	119.144	129.037	124.222	143.486	120.494	127.817
32:0-aPE	44.6054	43.8973	47.2464	29.1942	26.8795	28.3043
34:4-aPE	1.48398	1.24816	1.09441	1.53271	2.23223	1.56818
34:3-aPE	0.898845	1.72223	1.67674	1.79315	1.53708	1.26559
34:2-aPE	23.995	24.2303	25.8626	23.6788	18.4346	19.3175
34:1-aPE	64.4023	60.0405	64.8082	87.9424	76.9825	76.5896
36:6-aPE	222.556	212.75	246.702	65.3825	52.9094	50.9733
36:5-aPE	39.5908	37.5517	45.1324	7.92066	6.1792	6.43513
36:4-aPE	2.5071	0.676722	2.2297	1.72846	1.94387	1.23487
36:3-aPE	6.64534	6.76636	4.47346	4.42639	3.91607	3.5727
36:2-aPE	39.3841	35.0135	37.5815	24.1267	22.6571	22.4981
36:1-aPE	34.4816	34.6027	35.149	26.2736	21.5757	23.6534
38:7-aPE	390.68	400.056	443.368	226.584	191.04	187.602
38:6-aPE	142.424	139.692	158.793	67.1309	58.7024	60.751
38:5-aPE	19.3842	20.8129	25.7733	8.64804	7.18332	6.24381
38:4-aPE	4.58378	4.00891	4.45309	2.94366	3.07415	2.54571
38:3-aPE	2.73083	2.65684	2.594	2.18569	2.37642	2.49779
38:2-aPE	10.6653	10.4052	9.7562	8.10394	7.77549	7.05002
40:9-aPE	74.003	67.4388	66.0326	52.4839	45.3656	46.1739
40:8-aPE	399.048	386.213	395.358	171.303	140.834	140.986
40:7-aPE	195.319	195.673	218.463	79.291	66.4264	62.4358
40:6-aPE	65.299	84.5438	71.449	30.5598	27.1112	26.6833
40:5-aPE	24.8134	27.8938	20.5606	10.2788	9.44902	4.3932
40:4-aPE	1.27358	6.295	9.74071	3.86025	2.5206	2.15715
40:3-aPE	2.15334	1.14709	1.50801	0.588428	0.464985	0.688226
42:8-aPE	93.65	94.2058	102.872	54.7812	49.2791	45.8831
42:7-aPE	85.8477	91.2238	69.2593	45.4235	42.379	40.8267
42:6-aPE	38.7663	23.9013	45.4408	24.2355	18.4604	19.314
42:5-aPE	11.2878	8.6109	16.684	5.59218	8.03296	6.48796
42:4-aPE	3.33882	2.23357	3.84437	1.61171	2.28888	1.34678
44:8-aPE	4.15438	2.18897	6.18803	3.85745	3.73841	3.85534
44:7-aPE	21.9173	25.3053	28.0023	12.4215	8.16169	10.9725
44:6-aPE	14.2792	15.4465	17.2697	7.73347	6.35942	7.67752
44:5-aPE	2.34776	3.06822	2.00663	1.73066	2.23223	1.09866
46:9-aPE	0.674464	1.24816	0.945329	0.845873	0.754634	0.357115
46:8-aPE	0.566022	0.885846	0.19913	0.650048	0.404995	0.384911
46:7-aPE	2.07668	1.14681	2.89877	0.588232	0.723481	1.34357
46:6-aPE	1.66828	1.77238	0.83967	1.03907	1.70185	2.14261
46:5-aPE	1.24602	0.6246	0.955938	0.716133	0.522142	0.960332

## Sheet: PCspecies
	WT1	WT2	WT3	SREBP1	SREBP2	SREBP3
26:0-PC	7.73861	6.95121	7.72999	1.60069	2.58265	1.57065
28:1-PC	26.8431	25.4787	27.9171	3.80551	3.57616	3.16137
28:0-PC	33.7071	31.248	34.8838	8.07214	8.00597	6.94527
30:2-PC	18.9578	18.7244	20.1937	8.72989	8.03927	7.95082
30:1-PC	172.425	170.702	182.801	56.3883	52.5959	50.2365
30:0-PC	109.096	107.433	118.435	64.4195	62.5636	60.5498
32:3-PC	9.88748	10.3165	11.3402	6.30465	5.24508	5.28877
32:2-PC	253.322	258.158	261.589	116.872	93.6233	97.2677
32:1-PC	845.781	839.408	861.78	296.453	267.818	263.35
32:0-PC	186.717	182.143	195.878	116.394	111.13	104.078
34:4-PC	21.2059	21.6558	22.1742	20.6167	17.622	17.7593
34:3-PC	51.073	51.5947	53.5668	48.5513	43.1077	42.744
34:2-PC	919.276	951.206	960.506	600.907	519.535	521.402
34:1-PC	1307.37	1294.98	1400.54	721.625	665.725	647.786
34:0-PC	140.538	139.711	152.343	82.2903	79.1876	77.3705
36:6-PC	27.4164	28.6649	29.1571	36.0094	29.2278	30.8495
36:5-PC	100.097	101.482	100.585	137.298	116.149	118.263
36:4-PC	166.685	166.461	175.895	211.408	190.746	193.655
36:3-PC	129.51	130.78	136.396	152.027	139.709	136.584
36:2-PC	636.934	674.294	666.422	501.224	428.151	430.214
36:1-PC	225.933	228.854	242.015	178.626	168.715	159.787
36:0-PC	24.3906	24.2021	26.466	21.5209	19.1241	19.397
38:7-PC	39.1406	38.6054	40.2342	58.249	45.8969	48.9179
38:6-PC	145.858	149.486	151.317	179.108	151.669	157.113
38:5-PC	153.623	156.702	158.164	240.876	200.253	207.342
38:4-PC	95.5986	95.9645	101.054	144.43	129.639	130.621
38:3-PC	35.2572	34.5267	37.256	45.7495	43.3091	42.3421
38:2-PC	29.7029	29.1745	32.7092	32.3511	31.6402	29.951
38:1-PC	28.5571	27.3456	30.5533	19.4315	18.1204	17.6713
40:9-PC	3.26427	3.41437	3.59254	5.64779	5.08374	5.00688
40:8-PC	7.86101	7.81278	8.27039	14.9181	13.1181	13.0637
40:7-PC	50.4593	50.9126	51.9521	78.0592	65.2302	65.7005
40:6-PC	48.0892	47.9828	49.9359	72.0324	62.8235	61.9018
40:5-PC	28.1913	26.75	28.9646	37.3946	35.7852	33.4723
40:4-PC	10.8271	10.4468	11.6592	14.8704	13.864	12.974
40:3-PC	3.14202	3.06491	3.47433	3.90008	3.87432	3.60202
40:2-PC	1.97732	1.86909	2.16969	2.21855	2.45338	2.29465
42:9-PC	3.90521	3.91929	4.06996	8.21403	7.05454	7.0335
42:8-PC	4.31787	4.57043	4.68113	5.83395	5.32396	5.27696
42:7-PC	5.21378	5.18901	5.50946	4.613	4.04918	4.16229
42:6-PC	3.46032	3.41361	3.63802	4.0951	3.75899	3.3889
42:5-PC	1.85909	1.89852	1.97164	2.36657	2.24781	2.17591
42:4-PC	1.05802	0.904198	1.04243	1.24901	1.28188	1.2612
44:9-PC	0.771501	0.669793	0.748519	1.00215	0.772042	0.700035
44:8-PC	1.81799	1.95781	1.87209	1.51599	1.17161	1.21752
44:7-PC	0.764979	0.682879	0.795233	0.777097	0.656612	0.520269
44:6-PC	0.287945	0.340241	0.332496	0.44408	0.419421	0.38953
44:5-PC	0.24552	0.216764	0.262483	0.337313	0.233465	0.299944
46:9-PC	0.129259	0.185405	0.19111	0.210224	0.18495	0.246255
46:8-PC	0.123862	0.126236	0.145577	0.109866	0.0791959	0.101775
46:7-PC	0.134061	0.0745386	0.186026	0.0691702	0.118955	0.0826943
Total	6120.54	6172.66	6425.37	4371.22	3882.29	3855.04
